1 **Sex- and age- dependent effect of pre-gestational chronic stress and mirtazapine treatment on neurobehavioral**  
2 **development of offspring**

3 **Viñas-Noguera Mireia<sup>a,b\*</sup>, Csatlósová Kristína<sup>a,c</sup>, Šimončíčová Eva<sup>d</sup>, Bögi Ezster<sup>a</sup>, Ujházy Eduard<sup>a</sup>, Dubovický**  
4 **Michal<sup>a</sup>, Belovičová Kristína<sup>a</sup>**

5 <sup>a</sup>Centre of Experimental Medicine, Institute of Experimental Pharmacology and Toxicology, Slovak Academy of  
6 Sciences, Bratislava, Slovakia

7 <sup>b</sup>Faculty of Natural Sciences, Comenius University, Bratislava, Slovakia

8 <sup>c</sup>Jessenius Faculty of Medicine, Comenius University, Martin, Slovakia

9 <sup>d</sup>Division of Medical Sciences, University of Victoria, Victoria, BC, Canada

10

11 **\*Corresponding Author**

12 Centre of Experimental Medicine, Institute of Experimental Pharmacology and Toxicology

13 Slovak Academy of Sciences

14 Dúbravská cesta 9, 84104, Bratislava, Slovak Republic

15 e-mail: [exfamivi@savba.sk](mailto:exfamivi@savba.sk)

16

17 **ABSTRACT**

18 Hormonal fluctuations, such as the perinatal period, may increase susceptibility of women to depression, which in  
19 turn exert a negative impact on child's neurodevelopment, becoming a risk factor in development of  
20 neuropsychiatric disorders. Moreover, the use of antidepressants during this critical period presents a serious  
21 health concern for both the mother and the child, due to the consequences of treatment in terms of the reliability  
22 and safety for the proper neurodevelopment of the organism being not well known. Atypical antidepressants, such  
23 as mirtazapine, that targets both serotonergic and noradrenergic systems in the central nervous system (CNS),

24 represent a novel focus of research due to its unique pharmacological profile. The aim of this work was to study  
25 the effects of maternal depression and/or perinatal antidepressant mirtazapine treatment on the neurobehavioral  
26 development of the offspring. Pre-gestationally chronically stressed or non-stressed Wistar rat dams were treated  
27 with either mirtazapine (10 mg/kg/day) or vehicle during pregnancy and lactation followed by analysis of  
28 offspring's behavior at juvenile and adolescent age. We found mirtazapine induced alterations of nursing behavior.  
29 In offspring, pregestational stress (PS) had an anxiogenic effect on adolescent males and increased their active  
30 behavior in forced swim test. Interaction between pregestational stress and mirtazapine treatment variously  
31 induced anxiolytic changes of juvenile and adolescent females and impairment of spatial memory in adolescent  
32 females as well. Hippocampal density of synaptophysin, pre-synaptic protein marker, was decreased mainly by  
33 mirtazapine treatment. In conclusion, our results show mirtazapine induced alterations in maternal behavior and  
34 several sex- and age-dependent changes in neurobehavioral development of offspring caused by both prenatal  
35 mirtazapine treatment and/or chronic pregestational stress.

36 **Key words:** pre-gestational chronic stress, depression, mirtazapine, neurodevelopment, anxiety, spatial learning,  
37 synaptophysin

38

## 39 INTRODUCTION

40 An estimation of 17% men and 25% women experience an episode of major depressive disorder (MDD) at least once  
41 in their life (1). Higher susceptibility of women to depression may arise from the increased vulnerability caused by  
42 periods of hormonal fluctuation, such as the perinatal period (2,3). Perinatal depression has been reported to exert  
43 a negative impact in children neurodevelopment, becoming a risk factor in developing neuropsychiatric disorders  
44 (4–6).

45 Second generation antidepressants (SGA), such as selective serotonin reuptake inhibitors (SSRIs) (fluoxetine,  
46 sertraline) or serotonin-norepinephrine reuptake inhibitors (SNRIs) (venlafaxine) introduced in Europe in the 1980s,  
47 are recorded as the first line antidepressant treatment during pregnancy by most medication guides (7,8). The World  
48 Health Organization (WHO) estimates that depression is a leading cause of disability worldwide (9). However, the

49 main concern for specialists is the impact of the treatment on the developing fetus/child, namely risk of potential  
50 congenital malformations, neonatal withdrawal symptoms or poor neonatal adaptation syndrome as well as long-  
51 term neurodevelopmental consequences (10–13). In addition, the delay in treatment efficacy and the presence of  
52 many side effects lead researchers to investigate alternative antidepressants with better efficacy, faster onset of  
53 action and lesser counterproductive reactions.

54 Mirtazapine (MIR) (Fig 1) has a tetra-cyclic chemical structure with molecular weight of 265.36 and belongs to the  
55 piperazino-azepine group of compounds. It is a new generation antidepressant that has a different mechanism of  
56 action than SGAs, targeting both the serotonergic and noradrenergic systems in the CNS. It is a noradrenaline (NE)  
57 and specific serotonin (5-HT) antidepressant (NaSSA) that acts as an antagonist at central  $\alpha$ 2-adrenergic inhibitory  
58 autoreceptors and heteroreceptors, as well as at the 5-HT<sub>2</sub> and 5-HT<sub>3</sub> receptors. MIR enhances the release and  
59 availability of NE by blocking presynaptic inhibitory  $\alpha$ 2-autoreceptors and enhances the 5-HT release by antagonism  
60 of the  $\alpha$ 2-heteroreceptors in the serotonergic nerve terminals and simultaneously blockade of postsynaptic 5-HT<sub>2</sub>  
61 and 5-HT<sub>3</sub> receptors. Thanks to this double activity, MIR is suggested to induce earlier onset of antidepressant effects  
62 avoiding the serotonergic related side effects such as high body temperature, agitation, increased reflexes, tremor,  
63 sweating, dilated pupils, and diarrhea (14). However, it may induce an enhanced body weight gain and sleepiness  
64 (15,16). Mirtazapine has low *in vitro* affinity for central and peripheral dopaminergic, cholinergic, and muscarinic  
65 receptors, but high affinity for central and peripheral histamine H1 receptors. However, it appears that the  
66 antihistaminergic effects of the drug are counteracted by noradrenergic transmission when the drug is commenced  
67 at dosages  $\geq$ 15 mg/day, i.e. within the recommended dosage range (17). Initial dose of MIR is 15 mg/day orally once  
68 a day at bedtime and maintenance dose represents 15 to 45 mg orally once a day (18). Even though MIR seems to  
69 represent a plausible alternative of antidepressant medication during gestation and there is no evidence that use of  
70 mirtazapine in pregnancy causes birth defects, preterm birth, or low infant birth weight. While the evidence for  
71 other pregnancy outcomes is also reassuring, only small numbers of women have been studied and number of  
72 animal studies is not sufficient (19).

73 Despite lacking efficient translatability, several animal models, including chronic unpredictable stress, have been  
74 investigated for decades to evaluate depression-like behavioral changes and their potential mechanisms of action.

75 Studies in rodents show that chronic pre-gestational and prenatal maternal stress, which disrupt the maternal  
76 endocrine, nervous and immune systems, can induce long-term alterations in the synaptic structure and so impact  
77 the behavioral outcomes in the offspring (6,20). Prior to regulatory roles of serotonin, norepinephrine and dopamine  
78 neurotransmitters in adult brain, monoamines play an important role in the fetal maturation of the brain, such as -  
79 during neuronal proliferation, migration and differentiation, myelination and synaptogenesis (21). The exposure  
80 to stressful situations early in life may disable the optimal structural and functional development of hippocampus,  
81 due to the damaging action of excessive corticosterone concentration and dysregulation of monoamines (11,22).  
82 Persisting high levels of stress are thought to result in loss of synapses in circuits underlying affective and cognitive  
83 processes. These reductions are presumed to contribute to the symptoms of depression associated with major  
84 depressive disorder (23). Synaptophysin is a synaptic vesicle glycoprotein, which immunoreactivity is present in a  
85 punctate pattern in the hippocampus and has been used as a presynaptic marker for quantification of synapses (24).  
86 The hippocampal formation consists of several histologically distinguishable modules, such as Cornu Ammonis (CA)  
87 regions (CA1, CA2, CA3, CA4), dentate gyrus (DG), presubiculum, and subiculum. These regions of the hippocampus  
88 are associated with different functions (e.g. memory encoding and retrieval) and may be specifically disrupted in  
89 various diseases (25). Granule cells, the main output cells of the DG, send axons (mossy fibers) through CA4 to CA3  
90 and innervate a small number of pyramidal cells and a disproportionately large number of interneurons CA3 pyramidal  
91 cells then form recurrent excitatory network and send axons to CA1. Theoretical work, as well as anatomical,  
92 physiological, and behavioral experiments support the idea that the DG-CA3 system performs the pattern separation  
93 and the pattern completion of the inputs to the hippocampus, operations needed for memory encoding and retrieval  
94 (26). Purpose of the hippocampus happens to be severely affected by early life stress, predisposing the individual to  
95 an impaired reactivity when exposed to adverse environmental stimuli (27). In our previous study, we have shown  
96 that pre-gestational maternal stress may affect hippocampus at the time of birth by increasing the resting membrane  
97 potential, suppressing depolarization-activated action potential firing, and increasing the spontaneous activity of  
98 hippocampal cells from newborn rat offspring (28), but pre-gestational stress induced changes in different  
99 subregions of hippocampus are not thoroughly known. However, antidepressant treatment may facilitate the  
100 challenged neurogenesis by, upregulating the hippocampal concentration of glucocorticoid receptors, which help to  
101 attenuate the hyperactivity of the HPA axis and inducing morphological changes in the neuronal network (11,27,29).

102 Some studies suggest that developmental fluoxetine (SSRI) exposure of prenatally stressed male and female  
103 offspring reversed the effect of stress on the number of immature neurons in the dentate gyrus (DG), with effects  
104 being more prevalent in adult male offspring (30,31). However, knowledge of mirtazapine treatment's impact on  
105 pregnancy and lactation hippocampal neurogenesis of juvenile, adolescent and adult offspring during last days of  
106 pregnancy and for following 2 weeks postpartum (PP), is very limited.

107 The aim of the present study was to determine the possible implications that pre-gestational chronic stress have on  
108 the behavioral and neurodevelopmental outputs in the offspring of both sexes during juvenile and adolescent age  
109 and to investigate the consequences of administration of the new generation antidepressant mirtazapine on these  
110 variables aiming our focus on functional brain developments that starts day 10 PP (32–35).

111

## 112 **MATERIALS AND METHODS**

### 113 **Animal breeding**

114 Female nulliparous Wistar rats (initial weight 200–220 g, age 2–3 months, n=44) used in this study were obtained  
115 from the Department of Toxicology and Laboratory Animal Breeding Station of the Institute of Experimental  
116 Pharmacology and Toxicology, Centre of Experimental Medicine of the Slovak Academy of Sciences, Dobra Voda,  
117 Slovak Republic. After 7 days of acclimatization, females were randomly assigned to stress or non-stress groups.  
118 Animals in the stress group were exposed to unpredictable stressors of mild intensity for a total of 3 weeks. One  
119 week after the end of the stress procedure, females were mated with males in the ratio 3:1. The presence of  
120 spermatozoa in vaginal smears was considered day 0 of gestation. On day 15 of gestation, the females were  
121 separated and housed individually. The animals had *ad libitum* access to food pellets and water and were kept in a  
122 temperature and humidity-controlled room (20–24°C and relative humidity 50–60%) with 12/12 hours of light/dark  
123 cycle. The experiments were conducted in compliance with the Principles of Laboratory Animal Care issued by the  
124 Ethical Committee of the Institute of Experimental Pharmacology and Toxicology, Slovak Academy of Sciences,  
125 Bratislava, and the experimental design was approved by the State Veterinary and Food Administration of the Slovak  
126 Republic.

127 One day after birth, litters were culled to four males and four females (with eight offspring per cage). Reproductive  
128 variables were recorded right after the birth. The offspring were weaned on post-partum day 21 and housed in litter  
129 groups of same-sex four animals per cage. No more than two pups from the same mother per group (n= 6-8  
130 animals/group) were used for behavioral testing.

### 131 **Chronic unpredictable stress schedule**

132 In order to not expose females to stressors during pregnancy but rather study ongoing effects of chronic stress,  
133 females were assigned to stress or non-stress groups prior to breeding (Fig 2). The animals were exposed to 1-2  
134 stressors per day. The list of stressors included: 1) Overcrowding - 6 rats housed together (24h); 2) Exposure to damp  
135 bedding (12h); 3) Food deprivation (24h); 4) Predator stress – cloth with cat odor (10h); 5) Water deprivation (12h);  
136 6) Cage decline at 45-degree angle (6h); 7) Strobe light- flicker lights (12h).

### 137 **Mirtazapine treatment**

138 Mirtazapine (Mikrochem Trade spol. s r.o.) with a molecular weight of 265.36 was diluted in citric acid and  
139 administered orally via the wafer biscuit (size of 1 cm<sup>3</sup>) to pregnant rats from day 10 of gestation until sacrifice at  
140 the clinically relevant dose of 10 mg/kg once per day. Pups were receiving mirtazapine via mother until weaning on  
141 day 21 *post-partum* (PP). This dose was chosen based on a body surface area normalization (BSA) conversion used  
142 to determine the starting human dose extrapolated from animal studies. The Km factor, which is the ratio of body  
143 weight (kg) to body surface area (m<sup>2</sup>), is used to convert doses expressed in mg/kg to units of mg/m<sup>2</sup> (36). Dose 10  
144 mg/kg a day was used to simulate low dose end in humans. The dams from control groups received 1 cm<sup>3</sup> of wafer  
145 biscuit once a day filled with vehicle (water). Feeding was completed under investigator's supervision to ensure the  
146 dam consumed the entire biscuit. Pregnant dams were randomly divided into 4 groups: non-stress + VEHIC (vehicle),  
147 non-stress + MIR, stress + VEHIC, stress + MIR.

### 148 **Rat Grimace Scale**

149 Mothers were placed in individual cages for 10 min and each minute 4 pictures were taken from each rat from front  
150 with a Nikon professional camera. Animals were tested 5 weeks after CUS. Each picture was evaluated by a score  
151 from 0 to 2 according to the following four action units (37):

152 1. Orbital tightening: rats in pain display narrowing of the orbital area which manifests as partial or complete eye  
153 closure or squeezing.

154 2. Nose/cheek flattening: less bulging of nose and cheek and absence of crease between cheek and whisker pads.

155 3. Ear changes: ears in pain tend to fold, curl and angle forwards or outwards, and the space between ears is wider.

156 4. Whisker change: whiskers move forward (away from face) and tend to bunch.

#### 157 **Behavioral tests**

#### 158 **Maternal behavior**

159 Mothers were observed for 5 consecutive days from PD2 until PD6 two times per day for 5 min based on previous  
160 literature (20). Observations took place in the morning (between 8:30 a.m. and 10.00 a.m.) and the afternoon  
161 (between 2:30 p.m. and 3:30 p.m.). Time and number of bouts in the following maternal behaviors were recorded:  
162 licking; licking/nursing; nursing (arched-back nursing, blanket nursing, and/or passive nursing); nest building and  
163 time off the pups. Differences between groups in maternal behaviors were assessed using total time spent in these  
164 maternal behaviors.

#### 165 **Forced swim test (FST)**

166 The FST consists of a container filled with water where the animal is placed and cannot escape. The apparatus  
167 consists of a vertical cylindrical glass container (height 45 cm, diameter 25cm) filled with tap water at  $23\pm 1^\circ\text{C}$ . The  
168 water volume is enough to ensure that the animals can not touch the bottom of the container with their hind paws.  
169 The forced swim test was conducted over two days. On the first day, rats were introduced to the cylindrical glass  
170 tank filled with water for 15 min (not videotaped), towel-dried and returned to their home cage. Twenty-four hours  
171 later, the animals were exposed to the same experimental conditions for 5 min, dried and returned to their home  
172 cage. Sessions were videotaped and scored using the software ANYMAZE™ (Stoelting Europa, Co., Ireland). All tests  
173 were carried out between 8:00 a.m. to 12:00 p.m. The behavior scored in the forced swim test concerns: (1)  
174 immobility- floating with the absence of any movement, (2) latency to be immobile- time duration, (3) swimming,  
175 (4) climbing. Offspring was tested at the age of 48 days.

#### 176 **Elevated plus maze (EPM)**

177 All parts of the apparatus are made of dark polyvinyl plastic. The open and the closed arms of the maze are 50cm  
178 above the floor, 50cm long and 10cm wide. Two tests were running simultaneously. The movements of the rats were

179 tracked with digital camera and the individual sessions were analyzed by computer software ANYMAZETM (Stoelting  
180 Europe, Ireland). Mild light was provided by a lamp attached above the open arms of the maze. Each session lasted  
181 5 minutes and was started by placement of the rat in the central area facing the open arms of the maze. After each  
182 individual trial, the maze was wiped with a mild detergent. The testing was invariably carried out between 8:00 a.m.  
183 and 12:00 p.m. The behaviors scored were: (1) distance traveled in the open arms of the elevated plus maze, and (2)  
184 time spent in the open arms of the elevated plus maze. The animals were tested at the age of 27 and 47 days.

### 185 **Y-Maze**

186 The Y-Maze Test is widely used to assess exploratory behaviors, learning, and memory function in rodents and short-  
187 term memory (38). The apparatus was made from black Plexiglas (50x16x32 cm) in which the arms were  
188 symmetrically separated at 120°. No visual cues were placed inside the maze, but different extra-maze cues were  
189 visible from all three arms to enable spatial orientation. During the first trial, each animal could freely explore two  
190 arms of the maze for 15 min. and its behavior was recorded with a camera. Subsequently, animals were returned to  
191 the home cage for one minute and the maze was cleaned with 70% ethanol. The second trial lasted 5 minutes with  
192 animal having the access to all three arms. Sessions were videotaped and scored using the software ANYMAZE™  
193 (Stoelting Europa, Co., Ireland). All tests were carried out between 8:00 a.m. to 12:00 p.m. under dim light condition.  
194 The animals were tested at the age of 43 days. Spontaneous alternation behavior (the alternation percentage is  
195 calculated by dividing the number of alternations by number of possible triads x 100) is considered to reflect spatial  
196 working memory, while the total number of arm entries was considered to reflect spontaneous locomotor activity  
197 (39,40).

### 198 **Immunohistochemistry assay**

199 Collection of tissue from offspring was executed at different ages of the animals: in juvenile age (PP31) and in  
200 adolescent age (PP50). The animals were killed by cervical dislocation. Brains were extracted (not perfused) and  
201 post-fixed with 4% paraformaldehyde for 24 h, cryoprotected in 30% sucrose/phosphate-buffered saline solution for  
202 up to 1 week, rapid frozen with liquid nitrogen and kept at -80 °C. Before immunohistochemistry assay, brain tissue  
203 was sliced in 40 µm sections on a cryostat (Leica). Tissue sections were stored in antifreeze solution at -15°C. The  
204 Ca3, Ca4 and DG of the dorsal hippocampus were assessed for the presynaptic marker synaptophysin (Monoclonal  
205 Anti-Synaptophysin, Sigma) as described before (20). Tissue was first treated with 0.6 % H<sub>2</sub>O<sub>2</sub> for 30 minutes at room



206 temperature and then incubated with 5% Normal Goat Serum (NGS) (Lampire Biological Laboratories) in Tris-  
207 Buffered Saline Tween at room temperature for 30 min to decrease probability of non-specific antibody binding,  
208 followed by overnight incubation at 4°C in mouse anti-synaptophysin (1:200, Sigma Aldrich). Sections were then  
209 incubated at room temperature for 2 h in biotinylated goat anti-mouse (1:200, Vector Laboratories). Brain sections  
210 were further processed using the Avidin-Biotin Complex (ABC Elite kit; 1:1000; Vector laboratories) and DAB kit  
211 (Vector laboratories). Sections were mounted on Starfrost Advanced Adhesive for IHC (Bamed) dried, dehydrated  
212 and coverslipped with Permount (Fisher Scientific).

### 213 **Quantification**

214 Sections of the dorsal hippocampus were analyzed for optical densities of synaptophysin. Immunoreactivity for all  
215 sections was examined under 40x objective using Leica DM4000M. Photomicrographs were taken for three areas  
216 within each analyzed hippocampal region, i.e., CA3, CA4 and DG. The software ImageJ64 (Wayne Rasband, NIH,  
217 Bethesda MD, USA) was used for assessment of optical densities for all immunoreactive cells. The relative optical  
218 density was defined as the difference in optical density (grey level) after calibration between the area of interest  
219 and the background, which was an equivalent area adjacent to the area of interest with minimal staining.

### 220 **Data analysis**

221 Normality of data was analyzed by Shapiro-Wilks test. Data without normal distribution were analyzed using Kruskal-  
222 Wallis test (STATISTICA 10). Analysis of variance (factorial ANOVA) was used to evaluate differences in the individual  
223 variables of tests with normally distributed data (STATISTICA 10). Post-hoc comparisons utilized the Tukey HSD test  
224 ( $p \leq 0.05$ ). The data were expressed as mean  $\pm$  standard error mean (S.E.M). The changes with values of  $p \leq 0.05$  were  
225 considered statistically significant. All analysis was done in a blind manner.

226

## 227 **RESULTS**

### 228 **MOTHERS**

#### 229 **Grimace test**

230 Rat grimace test scores has been used to evaluate spontaneous pain (41). We observed significant main effect of  
231 stress on grimace test scores ( $F(1, 22) = 5.00$ ;  $p \leq 0.05$ ). Post-hoc analysis did not reveal any significant differences  
232 (Fig 3).

### 233 **Maternal behavior**

234 There was no significant main effect of stress or mirtazapine on total time dams spent nursing (Fig 4A), however, we  
235 observed significant main effect of mirtazapine on the percentage of passive nursing and blanket nursing ( $F(1, 30) =$   
236  $10.74$ ;  $p \leq 0.01$ ). Subsequent post-hoc analysis showed decrease of passive nursing ( $p \leq 0.05$ ) and increase of blanket  
237 nursing ( $p \leq 0.05$ ) in stress  $\times$  vehicle group as compared to both mirtazapine groups (Fig 4B).

### 238 **OFFSPRING**

#### 239 **Elevated plus maze- juvenile offspring**

240 We did not observe an effect of sex but there was a stress  $\times$  mirtazapine interaction in females on percentage of  
241 distance travelled in the open ( $F(1, 24) = 4.89$ ;  $p \leq 0.05$ ) (Fig 5A) and closed arms ( $F(1, 24) = 7.82$ ;  $p \leq 0.01$ ) (Fig 5B) of  
242 EPM, an effect was not present in male offspring. Further analysis showed a decrease in total distance travelled in  
243 stress  $\times$  vehicle females compared to control group.

#### 244 **Elevated plus maze- adolescent**

245 Main effect of sex was present in all parameters of elevated plus maze with females being more active (higher total  
246 distance travelled) than males ( $F(1, 62) = 9.04$ ;  $p \leq 0.01$ ).

247 In males, we observed marginally significant main effect of stress  $\times$  mirtazapine interaction in total distance travelled  
248 ( $F(1, 30) = 3.69$ ;  $p = 0.06$ ). Post-hoc analysis showed significantly decreased total distance travelled in stress  $\times$  vehicle  
249 group ( $p \leq 0.05$ ) compared to non-stress  $\times$  vehicle group. Also, trend for decrease in non-stress  $\times$  mirtazapine ( $p = 0.07$ )  
250 and stress  $\times$  mirtazapine ( $p = 0.07$ ) groups compared to non-stress  $\times$  vehicle group (Fig 6A) was present. In females,  
251 we did not observe any differences in total distance travelled (Fig 6A).

252 In males, there were no changes in the percentage of time spent in the open arm (Fig 6B) but we observed a main  
253 effect of stress ( $F(1, 30) = 4.53$ ;  $p \leq 0.05$ ) in the percentage of time spent in the closed arm and trend for stress  $\times$

254 mirtazapine interaction (1, 30)= 3.37;  $p=0.07$ ). Post-hoc analysis revealed that animals from stress  $\times$  vehicle group  
255 had significantly increased percentage of time spent in the closed arm compared to non-stress  $\times$  vehicle group  
256 ( $p\leq 0.05$ ) (Fig 6C).

257 In females, we observed marginally significant effect of mirtazapine ( $F(1, 32) = 3.70$ ;  $p=0.06$ ) and a trend in effect of  
258 stress ( $F(1, 32) = 3.06$ ;  $p=0.08$ ) on the percentage of time spent in the open arm. Post-hoc analysis revealed only  
259 marginally significant increase in stress  $\times$  mirtazapine group compared to non-stress  $\times$  vehicle group ( $p=0.06$ ) (Fig  
260 6B). There was marginally significant main effect of stress  $\times$  mirtazapine interaction ( $F(1, 32) = 3.53$ ;  $p=0.06$ ) in the  
261 percentage of time spent in the closed arm. Post-hoc analysis showed decrease in stress  $\times$  mirtazapine group  
262 significant compared to non-stress  $\times$  vehicle ( $p\leq 0.05$ ) and non-stress  $\times$  mirtazapine group ( $p\leq 0.05$ ) a trend in  
263 decrease compared to stress  $\times$  vehicle group ( $p=0.08$ ) (Fig 6C).

#### 264 **Forced swim test**

265 There were no sex differences in either of the selected forced swim test parameters.

266 Kruskal-Wallis test showed significant main effect of stress in time spent floating (males:  $H=7.41$ ;  $p\leq 0.01$ ; females:  
267  $H=6.90$ ;  $p\leq 0.01$ ), time spent climbing (males:  $H=4.47$ ;  $p\leq 0.05$ ; females: not significant) and time spent swimming  
268 (males:  $H=6.49$ ;  $p\leq 0.01$ ; females:  $H=10.24$ ;  $p\leq 0.001$ ). Further analysis revealed that floating time of stress  $\times$   
269 mirtazapine males was significantly decreased compared to non-stress  $\times$  vehicle males ( $p\leq 0.01$ ), however floating  
270 time of females was not significantly changed between individual groups (Fig 7A). Total swimming time of stress  $\times$   
271 mirtazapine males was significantly decreased compared to non-stress  $\times$  vehicle males ( $p\leq 0.01$ ) and floating time of  
272 stress  $\times$  mirtazapine females was significantly decreased compared to non-stress  $\times$  mirtazapine females ( $p\leq 0.01$ ) (Fig  
273 7B). Climbing time was not significantly changed between individual groups in either sex (Fig 7C).

#### 274 **Y-maze- adolescent**

275 We observed main effect of sex in both motor activity ( $F(1, 45) = 11.53$ ;  $p\leq 0.01$ ) as well as in percentage of  
276 spontaneous alterations ( $F(1, 45) = 4.27$ ;  $p\leq 0.05$ ) with females being more active but having decreased percentage  
277 of spontaneous alterations compared to males.

278 In males, a significant main effect of treatment ( $F(1, 20) = 9.79$ ;  $p \leq 0.01$ ) was observed in total distance travelled.  
279 Post-hoc analysis revealed marginally significant decrease in non-stress  $\times$  mirtazapine group compared to non-stress  
280  $\times$  vehicle group ( $p = 0.07$ ) and significant decrease compared to stress  $\times$  vehicle group ( $p \leq 0.05$ ) (Fig 8A). We did not  
281 observe any significant changes percentage of spontaneous alterations (Fig 8B).

282 In females, a significant main effect of stress was in total distance travelled ( $F(1, 25) = 4.95$ ;  $p \leq 0.05$ ). Post-hoc  
283 analysis showed marginally significant increase of horizontal motor activity in stress  $\times$  mirtazapine group compared  
284 to non-stress  $\times$  vehicle group ( $p = 0.07$ ) (Fig 8A). Further, we observed significant main effect of mirtazapine ( $F(1, 25)$   
285  $= 11.25$ ;  $p \leq 0.01$ ) and mirtazapine  $\times$  stress interaction ( $F(1, 25) = 7.81$ ;  $p \leq 0.01$ ) in percentage of spontaneous  
286 alterations. Post-hoc analysis revealed significant or marginally significant decrease in all groups (non-stress  $\times$   
287 mirtazapine  $p \leq 0.01$ ; stress  $\times$  vehicle  $p \leq 0.06$ ; stress  $\times$  mirtazapine  $p \leq 0.05$ ) compared to non-stress  $\times$  vehicle group  
288 (Fig 8B).

#### 289 **Synaptophysin-juvenile**

290 We did not observe any statistically significant changes in the synaptophysin optical density in the hippocampal areas  
291 Ca3, Ca4 and dentate gyrus (data not shown).

#### 292 **Synaptophysin-adolescent**

293 We found significant main effect of sex present only in area Ca4 of hippocampus ( $F(1, 47) = 7.23$ ;  $p \leq 0.01$ ) (Fig 9A).  
294 Further, we observed significant main effect of mirtazapine in hippocampal areas Ca3 ( $F(1, 19) = 9.01$ ;  $p \leq 0.01$ ) (Fig  
295 9B) and Ca4 ( $F(1, 23) = 5.87$ ;  $p \leq 0.05$ ) (Fig 9C) of females. Post-hoc analysis did not reveal significant differences  
296 between groups.

297

#### 298 **DISCUSSION**

299 In the present study, focused on possible implications of pre-gestational chronic stress on the neurodevelopmental  
300 and behavioral outputs in the offspring of both sexes during juvenile age and adolescence, we wanted to investigate  
301 the consequences of administration of the atypical antidepressant mirtazapine.

302 We evaluated the spontaneous pain of the mothers by the Rat Grimace Scale (RGS) and we found increased facial  
303 expression indicating pain in those mothers, which were exposed to stress schedule. RGS was developed to identify  
304 acute and inflammatory pain but it can be applied to a wider range of pain types and chronicity (42,43) and this is  
305 supported by our data that suggest ongoing influence of CUS even 5 weeks after the CUS procedure.  
306 Maternal behavior usually emerges close to parturition and after birth, with the female showing a very rapid interest  
307 in the new-born (44). Detrimental changes in maternal behavior can generate permanent neurological and social  
308 inclusion disturbances in offspring (45). We observed an effect of mirtazapine treatment on the proportion of passive  
309 to blanket nursing favoring the latter one, indicating a slight influence of mirtazapine on some aspects of maternal  
310 behavior. Mirtazapine acts by antagonizing the adrenergic alpha2-autoreceptors and alpha2-heteroreceptors as well  
311 as by blocking 5-HT2 and 5-HT3 receptors. It enhances, therefore, the release of norepinephrine and 5-HT1A-  
312 mediated serotonergic transmission (15). Since maternal behavior is strongly regulated by serotonin (46–48), we  
313 thus suppose that serotonin activity of MIR can underlie these changes. Shift in maternal behavior in favor of more  
314 active blanket nursing caused by antidepressant treatment is in line with our previous results from venlafaxine  
315 (serotonin-norepinephrine reuptake inhibitor) (49) as well as results from fluoxetine (selective serotonin reuptake  
316 inhibitor) (50).

### 317 ***Anxiety-like behavior***

318 Offspring of mothers that have experienced stress during gestation may have impaired emotional development due  
319 to a dysregulation of the HPA axis, leading to a higher risk of developing a cognitive and/or mood disorders in  
320 adulthood (28,51–53). We evaluated the effect of pregestational stress (PS) exposure on intensity of anxiety-like  
321 behavior by the elevated plus-maze test, a validated behavioral paradigm based on rodent's preference of closed to  
322 open spaces, with latter presenting a significant anxiety-like behavior inducing condition (54).

323 In this study, we didn't find significant sex-dependent differences in anxiety-like behavior of juvenile rats, what was  
324 expected due to unmaturing reproductive system (55). However, female offspring of stressed untreated mothers  
325 exhibited decreased anxiety-like behavior that was not present if mothers were treated with MIR. This was changed  
326 in adolescence, when females showed decreased anxiety-like behavior if mothers were stressed and treated with  
327 MIR. Different results were observed in adolescent male rats, who displayed decreased anxiety-like behavior due to  
328 pregestational stress, but mirtazapine treatment of mothers ameliorated this effect. Changes in anxiety-like

329 behavior, due to maternal stress, were previously described by several research groups (28,56). Although there are  
330 controversial results regarding effect of chronic pregestational stress on anxiety-like behavior of offspring, possibly  
331 due to the different stress paradigm strategies, a great proportion of studies postulate that male offspring whose  
332 mothers were submitted to stress before or during pregnancy are more reluctant to enter and spent time in the  
333 open arm of the elevated plus maze (57–59). This effect of perinatal mirtazapine treatment on anxiety-like behavior  
334 of offspring may be due to the antagonism that mirtazapine exerts on noradrenergic autoreceptors that in turn  
335 enhances the noradrenergic transmission opposing the stress-related response (60). However, the research group  
336 of Sahoo et al. studied the effects of prenatal exposure to mirtazapine on the postnatal development of rats, with  
337 animals spent less time in the open arm, albeit sex was not distinguished (61). Nevertheless, the sex-dependent  
338 differences in adaptive behavioral performance to a challenge due to maternal stress may be explained by the  
339 influence of individual fetal brain programming, differentially modulating e.g. the responsiveness to a new stimuli,  
340 or a hormone arousal during adolescence (62). Recent studies postulate that the sexual hormones, testosterone and  
341 estradiol, have a neuroprotective and anti-inflammatory role on cognitive functions (1,63), which is a possible  
342 ground for further investigation.

#### 343 ***Depressive-like behavior***

344 Modified forced swim test, based on the protocol established by Porsolt (64), has been used as a tool to determine  
345 the learned helplessness (rodent despair) and therapeutic efficacy of mirtazapine . However, several recent studies  
346 postulate that the immobility in this test may not be a sign of a depressive-like state but rather reflection of the  
347 individual ability to cope with an acute stressor, explaining the passive phenotype as a result of animal's difficulties  
348 to adapt to external stimuli (65,66).

349 Our results show an increased active behavior of animals from stressed mothers of both sexes regardless of  
350 mirtazapine treatment manifested as less time floating and more time trying to actively escape. Even though several  
351 studies declared increased immobility time in animals that have experienced stress during their lives, particularly  
352 prenatally, (52,67,68) there are studies showing possibility of prenatal stress inducing adaptive changes contributing  
353 to stress resilience later in life (69–71). Active behaviors , such as swimming and climbing, in the rat forced swimming  
354 test are differentially regulated by serotonergic and noradrenergic systems (72). Swimming behavior, in this test, is

355 modulated by serotonergic neurotransmission, as Brummelte and colleagues demonstrated a decreased swimming  
356 of offspring whose mothers were exposed to high levels of corticosterone while pregnant (73). Also, Vázquez et al.  
357 suggested that increased levels of serotonin in control animals after FST may be responsible for shorter time spent  
358 immobile and increased time spent swimming, corroborating an effect of the serotonergic system, which in turn  
359 modulates dopaminergic projections associated with the reward system and the coping with stress. In this terms,  
360 lower levels of serotonin were linked to a stress-induced anhedonic state, while higher levels promote a non-  
361 anhedonic state (52). Accordingly, higher levels of serotonin may be a plausible explanation to our results.

### 362 ***Spatial memory***

363 We encountered sex-dependent differences in the Y-maze, a behavioral paradigm set to assess the spatial memory  
364 performance building on the natural inclination of rodents to explore new environments. Male offspring from  
365 mirtazapine treated mothers showed reduced locomotive activity, indicating an influence of treatment on executive  
366 capacity. On the other hand, females seemed to be rather affected by the pregestational stress experience of the  
367 mothers, which induced a hyperactivity-like response. Such a result may be reflective of hyperactivity or even ADHD  
368 described in children of stressed mothers while pregnant (74,75). However, sex differences in reactivity to either  
369 pre-gestational stress or perinatal mirtazapine treatment related to potentially hyperactive behavior require further  
370 investigation. In children, PS is connected to cognitive, behavioral, and emotional problems such autism and ADHD  
371 (76,77). The maternal stress, manifesting as increased cortisol and corticotropin-releasing factor (CRF) levels, affects  
372 the fetal development by reprogramming the HPA axis, leading to impaired memory and learning due to the long-  
373 lasting effects in the hippocampus (78). Moreover, Deminière et al. had previously described an increased locomotor  
374 reactivity to novelty in litters of pre-gestationally stressed mothers, which authors associated with a modified  
375 dopaminergic activity in the prefrontal cortex and nucleus accumbens (79). Experience-dependent plasticity of  
376 hippocampal neurons and adult neurogenesis, processes of importance for optimal learning or memory formation  
377 and processing, are modulated through epigenetic mechanisms, which induce long-lasting changes determining the  
378 ability of individuals to cope with adverse situations (80,81).

379 In our study, adolescent females had impaired spatial memory, represented by decreased percentage of  
380 spontaneous alternations, as a result of maternal stress as well as mirtazapine treatment. However, this effect was

381 not present in males. Conrad et al. studied the effects of chronic stress on spatial memory performance of adult rats  
382 concluding that stress impaired the spatial learning and memory, hippocampi-dependent spatial tasks. Authors also  
383 resolved that females seem to be less vulnerable to these hippocampi-dependent memory deficits (38,82).  
384 Nevertheless, they didn't study the effects in the offspring. Otherwise, female rats have been linked to more active  
385 response in novel environments (30,83,84) and, in line with our results, pregestational stress as well antidepressant  
386 treatment highlighted this response with effect of mirtazapine being more pronounced in animals without  
387 pregestational stress exposure. Similar results have been postulated in association with other antidepressant such  
388 as fluoxetine, bupropion or citalopram (74,85). Nevertheless, our results show a clear influence of pre-gestational  
389 stress and antidepressant treatment in the onset of behavioral tasks, which may be driven by the differential  
390 strategies used by each sex to cope with adversity. Moreover, we could take into account that we evaluated animals  
391 during adolescence, which is known as a time of increased physiological and psychological changes, which make  
392 them more vulnerable and unpredictable to external influences (86–88).

### 393 ***Synaptophysin analysis***

394 Synaptophysin is used as a marker of synaptic plasticity and synaptic nerve terminal density (89). We analyzed optical  
395 density (OD) of synaptophysin, a calcium-binding glycoprotein widely distributed in the presynaptic vesicle  
396 membrane, that is required for vesicle fusion and neurotransmitter release, in the CA3, CA4 and DG areas of the  
397 hippocampus. Results of synaptophysin density in our study were age-dependent with no changes in juvenile  
398 offspring. However, with onset of adolescence we observed prominent effect of sex with synaptophysin OD males  
399 remaining intact under all conditions while females being influenced by maternal mirtazapine treatment. This effect  
400 was regionally specific as changes were observed only in CA3 and CA4 areas but not in DG. Sex differences can be  
401 seen in the neural plasticity at DG-CA3 synapses. In short, mossy fibers evoke larger population spikes in CA3  
402 pyramidal neurons in females during proestrus and estrus relative to males, while mossy fibers in males have  
403 stronger synaptic connections to CA3 neurons than females (90). Limitation of our study is that we didn't evaluate  
404 estrus cycle phase before extraction of the brains. There is very limited research available on maternal  
405 antidepressant treatment in association with synaptophysin OD. Fluoxetine, a SSRI, has been proven to impact  
406 synaptophysin OD of CA3 in the same sex- and age-dependent manner as seen in our study (31). Previous studies



407 have encountered a reduced expression of synaptophysin in the hippocampus as whole or in DG, no research is done  
408 on other specific regions, at different ages (PP7, PP14, adult) of pre-gestationally stressed pups (91–93), suggesting  
409 the involvement of early-life stress in modulation of synaptic plasticity, which could lead to development of neuronal  
410 deficits during adulthood (94,95). Previous studies suggested a regulatory role of ovarian hormones in the  
411 developing brain (94) explaining the differential effect of stress on limbic synaptic plasticity in female rats. However,  
412 there are differences between our study compared to studies previously mentioned. Our model comprises of CUS  
413 prior to gestation and we tested the offspring in adolescent age, when the reproductive system of the offspring is  
414 not fully developed, so we can't rule out other stress related changes in later life that were not seen in this study.

415

#### 416 **CONCLUSIONS**

417 Neurobiology of depression remains mostly unexplained with several theories trying to identify its etiology including  
418 the impairment of monoaminergic systems coupled with an altered neural plasticity, dysregulation of the HPA axis  
419 or the immunological response. Maternal depression as well as antidepressant treatment thus may lead to a broad  
420 spectrum of neurodevelopmental changes in the offspring. Our results suggest mirtazapine induced alterations in  
421 maternal behavior and several sex- and age-dependent changes in neurobehavioral development of offspring caused  
422 by either or combination of prenatal mirtazapine treatment and chronic pre-gestational stress.

423

#### 424 **ACKNOWLEDGMENTS**

425 The study was supported by the VEGA Scientific Agency (VEGA 2/0124/19) and APVV grant of Slovak Republic (APVV-  
426 19-0435). The authors confirm that there is no conflict of interest.

427

#### 428 **REFERENCES**

- 429 1. Slavich GM, Sacher J. Stress, sex hormones, inflammation, and major depressive disorder: Extending Social  
430 Signal Transduction Theory of Depression to account for sex differences in mood disorders.  
431 *Psychopharmacology (Berl)*. 2019;236(10):3063–79.

- 432 2. Pawluski JL, Császár E, Savage E, Martinez-Claros M, Steinbusch HWM, van den Hove D. Effects of stress  
433 early in gestation on hippocampal neurogenesis and glucocorticoid receptor density in pregnant rats.  
434 *Neuroscience*. 2015;290:379–88.
- 435 3. Liu J, Meng F, Dai J, Wu M, Wang W, Liu C, et al. The BDNF-FoxO1 Axis in the medial prefrontal cortex  
436 modulates depressive-like behaviors induced by chronic unpredictable stress in postpartum female mice.  
437 *Mol Brain*. 2020;13(1):1–14.
- 438 4. Kiryanova V, Meunier SJ, Vecchiarelli HA, Hill MN, Dyck RH. Effects of maternal stress and perinatal  
439 fluoxetine exposure on behavioral outcomes of adult male offspring. *Neuroscience*. 2016;320:281–96.
- 440 5. Gustafsson HC, Sullivan EL, Nousen EK, Sullivan CA, Huang E, Rincon M, et al. Maternal prenatal depression  
441 predicts infant negative affect via maternal inflammatory cytokine levels. *Brain Behav Immun*.  
442 2018;73(June):470–81.
- 443 6. Mandolini GM, Lazzaretti M, Delvecchio G, Bressi C, Soares JC, Brambilla P. Association between serum  
444 BDNF levels and maternal perinatal depression: A review: Special Section on “Translational and  
445 Neuroscience Studies in Affective Disorders” Section Editor, Maria Nobile MD, PhD. *J Affect Disord*.  
446 2020;261(August):271–6.
- 447 7. Bénard-Larivière A, Pambrun E, Sutter-Dallay AL, Gautier S, Hurault-Delarue C, Damase-Michel C, et al.  
448 Patterns of antidepressant use during pregnancy: a nationwide population-based cohort study. *Br J Clin*  
449 *Pharmacol* [Internet]. 2018 Aug 1 [cited 2021 Jun 15];84(8):1764–75. Available from:  
450 </pmc/articles/PMC6046485/>
- 451 8. Molenaar NM, Kamperman AM, Boyce P, Bergink V. Guidelines on treatment of perinatal depression with  
452 antidepressants: An international review [Internet]. Vol. 52, *Australian and New Zealand Journal of*  
453 *Psychiatry*. SAGE Publications Inc.; 2018 [cited 2021 Jun 15]. p. 320–7. Available from:  
454 </pmc/articles/PMC5871019/>
- 455 9. Depression [Internet]. [cited 2021 Jun 15]. Available from: [https://www.who.int/news-room/fact-](https://www.who.int/news-room/fact-sheets/detail/depression)  
456 [sheets/detail/depression](https://www.who.int/news-room/fact-sheets/detail/depression)
- 457 10. Czarzasta K, Makowska-Zubrycka M, Kasarello K, Skital VM, Tyszkowska K, Matusik K, et al. A rat model to  
458 study maternal depression during pregnancy and postpartum periods, its comorbidity with cardiovascular  
459 diseases and neurodevelopmental impact in the offspring. *Physiol Behav*. 2019;199:258–64.
- 460 11. Kott JM, Mooney-Leber SM, Brummelte S. Developmental outcomes after gestational antidepressant  
461 treatment with sertraline and its discontinuation in an animal model of maternal depression. *Behav Brain*  
462 *Res*. 2019;366(February):1–12.

- 463 12. Uguz F. Short-Term Safety of Paroxetine Plus Low-Dose Mirtazapine during Lactation. *Breastfeed Med.*  
464 2019;14(2):131–2.
- 465 13. Wikenius E, Myhre AM, Page CM, Moe V, Smith L, Heiervang ER, et al. Prenatal maternal depressive  
466 symptoms and infant DNA methylation: a longitudinal epigenome-wide study. *Nord J Psychiatry.*  
467 2019;73(4–5):257–63.
- 468 14. Volpi-Abadie J, Kaye AM, Kaye AD. Serotonin syndrome. *Ochsner J.* 2013;13(4):533–40.
- 469 15. Anttila SAK, Leinonen EVJ. A review of the pharmacological and clinical profile of mirtazapine. *CNS Drug*  
470 *Reviews* Neva Press Inc.; 2001 p. 249–64.
- 471 16. Fawcett J, Barkin RL. Review of the results from clinical studies on the efficacy, safety and tolerability of  
472 mirtazapine for the treatment of patients with major depression. *J Affect Disord.* 1998;51(3):267–85.
- 473 17. Holm KJ, Markham A. Mirtazapine: A review of its use in major depression. *Drugs.* 1999;57(4):607–31.
- 474 18. Mirtazapine Dosage Guide with Precautions - Drugs.com [Internet]. [cited 2021 Jan 13]. Available from:  
475 <https://www.drugs.com/dosage/mirtazapine.html>
- 476 19. Smit M, Dolman KM, Honig A. Mirtazapine in pregnancy and lactation - A systematic review. *Eur*  
477 *Neuropsychopharmacol.* 2016;26(1):126–35.
- 478 20. Gemmel M, Kokras N, Dalla C, Pawluski JL. Perinatal fluoxetine prevents the effect of pre-gestational  
479 maternal stress on 5-HT in the PFC, but maternal stress has enduring effects on mPFC synaptic structure in  
480 offspring. *Neuropharmacology.* 2018;128:168–80.
- 481 21. Herlenius E, Lagercrantz H. Development of neurotransmitter systems during critical periods. *Exp Neurol.*  
482 2004;190:8–21.
- 483 22. Herlenius E, Lagercrantz H. Neurotransmitters and neuromodulators during early human development.  
484 *Early Hum Dev.* 2001;65(1):21–37.
- 485 23. Holmes SE, Scheinost D, Finnema SJ, Naganawa M, Davis MT, DellaGioia N, et al. Lower synaptic density is  
486 associated with depression severity and network alterations. *Nat Commun.* 2019;10(1):1–10.
- 487 24. Xu L, Long J, Su Z, Xu B, Lin M, Chen Y, et al. Restored presynaptic synaptophysin and cholinergic inputs  
488 contribute to the protective effects of physical running on spatial memory in aged mice. *Neurobiol Dis.*  
489 2019;132.
- 490 25. Bódi N, Polgár A, Kiss E, Mester, Poór G, Kéri S. Reduced volumes of the CA1 and CA4-dentate gyrus  
491 hippocampal subfields in systemic lupus erythematosus. *Lupus.* 2017;26(13):1378–82.

- 492 26. Senzai Y. Function of local circuits in the hippocampal dentate gyrus-CA3 system. Vol. 140, *Neuroscience*  
493 *Research*. 2019. p. 43–52.
- 494 27. Furuse K, Ukai W, Hashimoto E, Hashiguchi H, Kigawa Y, Ishii T, et al. Antidepressant activities of  
495 escitalopram and blonanserin on prenatal and adolescent combined stress-induced depression model:  
496 Possible role of neurotrophic mechanism change in serum and nucleus accumbens. *J Affect Disord*.  
497 2019;247(July 2018):97–104.
- 498 28. Bögi E, Belovičová K, Moravčíková L, Csatlósová K, Dremencov E, Lacinova L, et al. Pre-gestational stress  
499 impacts excitability of hippocampal cells in vitro and is associated with neurobehavioral alterations during  
500 adulthood. *Behav Brain Res*. 2019;375:112131.
- 501 29. Youssef M, Atsak P, Cardenas J, Kosmidis S, Leonardo ED, Dranovsky A. Early life stress delays hippocampal  
502 development and diminishes the adult stem cell pool in mice. *Sci Rep*. 2019 Dec;9(1).
- 503 30. Rayen I, van den Hove DL, Prickaerts J, Steinbusch HW, Pawluski JL. Fluoxetine during development  
504 reverses the effects of prenatal stress on depressive-like behavior and hippocampal neurogenesis in  
505 adolescence. Borlongan C V., editor. *PLoS One* [Internet]. 2011 Jan 1 [cited 2015 Dec 18];6(9):e24003.  
506 Available from: <http://dx.plos.org/10.1371/journal.pone.0024003>
- 507 31. Rayen I, Gemmel M, Pauley G, Steinbusch HWMM, Pawluski JL. Developmental exposure to SSRIs, in  
508 addition to maternal stress, has long-term sex-dependent effects on hippocampal plasticity.  
509 *Psychopharmacology (Berl)* [Internet]. 2015 Apr [cited 2016 Feb 4];232(7):1231–44. Available from:  
510 <http://www.ncbi.nlm.nih.gov/pubmed/25304865>
- 511 32. Thion MS, Garel S. On place and time: microglia in embryonic and perinatal brain development [Internet].  
512 Vol. 47, *Current Opinion in Neurobiology*. Elsevier Ltd; 2017 [cited 2020 Aug 13]. p. 121–30. Available from:  
513 <https://linkinghub.elsevier.com/retrieve/pii/S0959438817301186>
- 514 33. Reemst K, Noctor SC, Lucassen PJ, Hol EM. The indispensable roles of microglia and astrocytes during brain  
515 development. *Front Hum Neurosci* [Internet]. 2016 Nov 8 [cited 2020 Aug 13];10(NOV2016):566. Available  
516 from: [www.frontiersin.org](http://www.frontiersin.org)
- 517 34. Dobbing J, Sands J. Comparative aspects of the brain growth spurt. *Early Hum Dev* [Internet]. 1979 Mar  
518 [cited 2018 Jan 15];3(1):79–83. Available from: <http://www.ncbi.nlm.nih.gov/pubmed/118862>
- 519 35. Semple BD, Blomgren K, Gimlin K, Ferriero DM, Noble-Haeusslein LJ. Brain development in rodents and  
520 humans: Identifying benchmarks of maturation and vulnerability to injury across species. Vols. 106–107,  
521 *Progress in Neurobiology*. 2013. p. 1–16.
- 522 36. Reagan-Shaw S, Nihal M, Ahmad N. Dose translation from animal to human studies revisited. *FASEB J*

- 523 [Internet]. 2008 Mar [cited 2014 Jul 14];22(3):659–61. Available from:  
524 <http://www.ncbi.nlm.nih.gov/pubmed/17942826>
- 525 37. Sotocinal SG, Sorge RE, Zaloum A, Tuttle AH, Martin LJ, Wieskopf JS, et al. The Rat Grimace Scale: A partially  
526 automated method for quantifying pain in the laboratory rat via facial expressions. *Mol Pain* [Internet].  
527 2011 [cited 2021 Jun 16];7. Available from: <https://pubmed.ncbi.nlm.nih.gov/21801409/>
- 528 38. Conrad CD, Galea LAM, Kuroda Y, McEwen BS. Chronic stress impairs rat spatial memory on the Y maze,  
529 and this effect is blocked by tianeptine pretreatment. *Behav Neurosci*. 1996;110(6):1321–34.
- 530 39. Harquin Simplicie F, David Emery T, Hervé Hervé NA. Enhancing spatial memory: Anxiolytic and  
531 antidepressant effects of *Tapinanthus dodoneifolius* (DC) Danser in mice. *Neurol Res Int*. 2014;2014.
- 532 40. Kraeuter A, Guest PC. Chapter 10. 2019;1916:105–11.
- 533 41. Whittaker AL, Howarth GS. Use of spontaneous behaviour measures to assess pain in laboratory rats and  
534 mice: How are we progressing? [Internet]. Vol. 151, *Applied Animal Behaviour Science*. 2014 [cited 2020  
535 Oct 30]. p. 1–12. Available from: <https://linkinghub.elsevier.com/retrieve/pii/S0168159113002591>
- 536 42. Leung VSY, Benoit-Biancamano MO, Pang DSJ. Performance of behavioral assays: The Rat Grimace Scale,  
537 burrowing activity and a composite behavior score to identify visceral pain in an acute and chronic colitis  
538 model. *Pain Reports* [Internet]. 2019 Mar 1 [cited 2021 May 18];4(2). Available from:  
539 <https://pubmed.ncbi.nlm.nih.gov/31041420/>
- 540 43. Schneider LE, Henley KY, Turner OA, Pat B, Niedzielko TL, Floyd CL. Application of the Rat Grimace Scale as  
541 a Marker of Supraspinal Pain Sensation after Cervical Spinal Cord Injury. *J Neurotrauma* [Internet]. 2017  
542 Nov 1 [cited 2021 May 18];34(21):2982–93. Available from: <https://pubmed.ncbi.nlm.nih.gov/27998207/>
- 543 44. Lévy F. Neuroendocrine control of maternal behavior in non-human and human mammals. *Ann Endocrinol*  
544 (Paris) [Internet]. 2016 Jun 1 [cited 2021 May 18];77(2):114–25. Available from:  
545 <https://linkinghub.elsevier.com/retrieve/pii/S0003426616300178>
- 546 45. Weinstock M. Prenatal stressors in rodents: Effects on behavior. Vol. 6, *Neurobiology of Stress*. Elsevier Inc;  
547 2017. p. 3–13.
- 548 46. Pawluski JL, Li M, Lonstein JS. Serotonin and motherhood: From molecules to mood [Internet]. Vol. 53,  
549 *Frontiers in Neuroendocrinology*. Academic Press Inc.; 2019 [cited 2021 May 18]. p. 100742. Available  
550 from: </pmc/articles/PMC6541513/>
- 551 47. Chen W, Zhang Q, Su W, Zhang H, Yang Y, Qiao J, et al. Effects of 5-hydroxytryptamine 2C receptor agonist  
552 MK212 and 2A receptor antagonist MDL100907 on maternal behavior in postpartum female rats.

- 553 Pharmacol Biochem Behav [Internet]. 2014 [cited 2021 May 18];117:25–33. Available from:  
554 /pmc/articles/PMC4034582/
- 555 48. Gemmel M, Bögi E, Ragan C, Hazlett M, Dubovicky M, van den Hove DL, et al. Perinatal selective serotonin  
556 reuptake inhibitor medication (SSRI) effects on social behaviors, neurodevelopment and the epigenome  
557 [Internet]. Vol. 85, Neuroscience and Biobehavioral Reviews. Elsevier Ltd; 2018 [cited 2021 May 18]. p.  
558 102–16. Available from: <https://linkinghub.elsevier.com/retrieve/pii/S0149763417300763>
- 559 49. Belovičová K, Šimončíčová E, Noguera MV, Dubovický M, Bögi E. Long-term effects of pre-gestational stress  
560 and perinatal venlafaxine treatment on neurobehavioral development of female offspring. Behav Brain Res  
561 [Internet]. 2021 Feb 1 [cited 2021 May 18];398. Available from:  
562 <https://pubmed.ncbi.nlm.nih.gov/33017639/>
- 563 50. Gemmel M, Harmeyer D, Bögi E, Fillet M, Hill LA, Hammond GL, et al. Perinatal fluoxetine increases  
564 hippocampal neurogenesis and reverses the lasting effects of pre-gestational stress on serum  
565 corticosterone, but not on maternal behavior, in the rat dam. Behav Brain Res [Internet]. 2018 Feb 26  
566 [cited 2018 Feb 13];339:222–31. Available from: <http://www.ncbi.nlm.nih.gov/pubmed/29203333>
- 567 51. Lian S, Xu B, Wang D, Wang L, Li W, Yao R, et al. Possible mechanisms of prenatal cold stress induced-  
568 anxiety-like behavior depression in offspring rats. Behav Brain Res. 2019;359(August 2018):304–11.
- 569 52. Vásquez F de JJ, Guerrero DM, Osornio MR, Osornio MDCR, Suárez SO, Retana-márquez S. Decreased  
570 serotonin content and release in the ventral hippocampus of prenatally stressed male rats in response to  
571 forced swim test. Acta Neurobiol Exp (Wars). 2020;80(4):331–43.
- 572 53. Miyagawa K, Tsuji M, Fujimori K, Saito Y, Takeda H. Prenatal stress induces anxiety-like behavior together  
573 with the disruption of central serotonin neurons in mice. Neurosci Res. 2011 May;70(1):111–7.
- 574 54. Belovicova K, Bogi E, Csatlósova K, Dubovicky M. Animal tests for anxiety-like and depression-like behavior  
575 in rats. Interdiscip Toxicol [Internet]. 2017 Sep 1 [cited 2021 Jun 16];10(1):40–3. Available from:  
576 /pmc/articles/PMC6096862/
- 577 55. Sengupta P. The laboratory rat: Relating its age with human's [Internet]. Vol. 4, International Journal of  
578 Preventive Medicine. Wolters Kluwer -- Medknow Publications; 2013 [cited 2021 Jun 16]. p. 624–30.  
579 Available from: /pmc/articles/PMC3733029/
- 580 56. Grundwald NJ, Brunton PJ. Psychoneuroendocrinology Prenatal stress programs neuroendocrine stress  
581 responses and affective behaviors in second generation rats in a sex-dependent manner.  
582 Psychoneuroendocrinology. 2015;62:204–16.
- 583 57. Hutchison SM, Masse LC, Pawluski JL, Tim F. Perinatal selective serotonin reuptake inhibitor (SSRI) and

- 584 other antidepressant exposure effects on anxiety and depressive behaviors in offspring: A review of  
585 findings in humans and rodent models Sarah. *Reprod Toxicol*. 2020;
- 586 58. Millard SJ, Lum JS, Fernandez F, Newell KA. Perinatal exposure to fluoxetine increases anxiety- and  
587 depressive-like behaviours and alters glutamatergic markers in the prefrontal cortex and hippocampus of  
588 male adolescent rats : A comparison between Sprague-Dawley rats and the Wistar-Kyoto rat model . 2019;
- 589 59. Brunton PJ, Russell JA. Prenatal Social Stress in the Rat Programmes Neuroendocrine and Behavioural  
590 Responses to Stress in the Adult Offspring : Sex-Specific Effects *Neuroendocrinology*. 2010;(10):258–71.
- 591 60. Rauggi R, Cassanelli A, Raone A, Tagliamonte A, Gambarana C. Study of mirtazapine antidepressant effects  
592 in rats. *Int J Neuropsychopharmacol*. 2005;8(3):369–79.
- 593 61. Sahoo J, Pattnaik AK, Mishra N. Behavioral and developmental changes in rats with prenatal exposure of  
594 mirtazapine. *Sci Pharm*. 2010;78(3):451–63.
- 595 62. Oyola MG, Handa RJ. Hypothalamic–pituitary–adrenal and hypothalamic–pituitary–gonadal axes: sex  
596 differences in regulation of stress responsivity. *Stress*. 2017;20(5):476–94.
- 597 63. Jezova D, Balagova L, Chmelova M, Hlavacova N. Classical Steroids in a New Fashion : Focus on  
598 Testosterone and Aldosterone Classical Steroids in a New Fashion : Focus on Testosterone and  
599 Aldosterone. 2019;
- 600 64. Porsolt. BEHAVIOURAL DESPAIR IN RATS : A NEW MODEL SENSITIVE TO ANTIDEPRESSANT TREATMENTS.  
601 1977;47.
- 602 65. Wisłowska-Stanek A, Płaźnik A, Kołosowska K, Skórzewska A, Turzyńska D, Liguz-Lęcznar M, et al.  
603 Differences in the dopaminergic reward system in rats that passively and actively behave in the Porsolt  
604 test. *Behav Brain Res*. 2019;359(June 2018):181–9.
- 605 66. Molendijk ML, de Kloet ER. Coping with the forced swim stressor: Current state-of-the-art. *Behav Brain*  
606 *Res*. 2019;364(February):1–10.
- 607 67. Yang R, Zhang MQ, Xue Y, Yang R, Tang MM. Dietary of n-3 polyunsaturated fatty acids influence  
608 neurotransmitter systems of rats exposed to unpredictable chronic mild stress. *Behav Brain Res*.  
609 2019;376(April):112172.
- 610 68. Morley-Fletcher S, Darnaudery M, Koehl M, Casolini P, Van Reeth O, Maccari S. Prenatal stress in rats  
611 predicts immobility behavior in the forced swim test: Effects of a chronic treatment with tianeptine. *Brain*  
612 *Res [Internet]*. 2003 Nov 7 [cited 2021 May 20];989(2):246–51. Available from:  
613 <https://pubmed.ncbi.nlm.nih.gov/14556947/>

- 614 69. Cenicerros LC, Capitanio JP, Kinnally EL. Prenatal Relocation Stress Enhances Resilience Under Challenge in  
615 Infant Rhesus Macaques. *Front Behav Neurosci* [Internet]. 2021 Mar 29 [cited 2021 May 20];15. Available  
616 from: <https://pubmed.ncbi.nlm.nih.gov/33854420/>
- 617 70. Serpeloni F, Radtke KM, Hecker T, Sill J, Vukojevic V, De Assis SG, et al. Does prenatal stress shape  
618 postnatal resilience? An epigenome-wide study on violence and mental health in humans. *Front Genet*  
619 [Internet]. 2019 [cited 2021 May 20];10(MAR). Available from:  
620 <https://pubmed.ncbi.nlm.nih.gov/31040859/>
- 621 71. Oosterhof CA, El Mansari M, Merali Z, Blier P. Altered monoamine system activities after prenatal and  
622 adult stress: A role for stress resilience? *Brain Res* [Internet]. 2016 Jul 1 [cited 2021 May 20];1642:409–18.  
623 Available from: <https://pubmed.ncbi.nlm.nih.gov/27086968/>
- 624 72. Detke MJ, Rickels M, Lucki I. Active behaviors in the rat forced swimming test differentially produced by  
625 serotonergic and noradrenergic antidepressants. *Psychopharmacology (Berl)* [Internet]. 1995 Sep [cited  
626 2021 Jun 16];121(1):66–72. Available from: <https://link.springer.com/article/10.1007/BF02245592>
- 627 73. Brummelte S, Lieblich SE, Galea LAM. Gestational and postpartum corticosterone exposure to the dam  
628 affects behavioral and endocrine outcome of the offspring in a sexually-dimorphic manner.  
629 *Neuropharmacology*. 2012;62(1):406–18.
- 630 74. Sprowles JLN, Hufgard JR, Gutierrez A, Bailey RA, Jablonski SA, Williams MT, et al. Differential effects of  
631 perinatal exposure to antidepressants on learning and memory, acoustic startle, anxiety, and open-field  
632 activity in Sprague-Dawley rats. *Int J Dev Neurosci* [Internet]. 2017 Oct 1 [cited 2021 May 25];61(1):92–  
633 111. Available from: <https://onlinelibrary.wiley.com/doi/abs/10.1016/j.ijdevneu.2017.06.004>
- 634 75. Rosenqvist MA, Sjölander A, Ystrom E, Larsson H, Reichborn-Kjennerud T. Adverse family life events during  
635 pregnancy and ADHD symptoms in five-year-old offspring. *J Child Psychol Psychiatry Allied Discip*  
636 [Internet]. 2019 Jun 1 [cited 2021 Jun 21];60(6):665–75. Available from:  
637 <https://pubmed.ncbi.nlm.nih.gov/30367686/>
- 638 76. Simons SSH, Zijlmans MAC, Cillessen AHN, de Weerth C. Maternal prenatal and early postnatal distress and  
639 child stress responses at age 6. *Stress* [Internet]. 2019 Nov 2 [cited 2021 Jun 21];22(6):654–63. Available  
640 from: <https://pubmed.ncbi.nlm.nih.gov/31092104/>
- 641 77. Schepanski S, Buss C, Hanganu-Opatz IL, Arck PC. Prenatal Immune and Endocrine Modulators of  
642 Offspring's Brain Development and Cognitive Functions Later in Life [Internet]. Vol. 9, *Frontiers in*  
643 *immunology*. NLM (Medline); 2018 [cited 2021 Jun 21]. p. 2186. Available from:  
644 </pmc/articles/PMC6168638/>



- 645 78. Richetto J, Riva MA. Prenatal maternal factors in the development of cognitive impairments in the  
646 offspring. *J Reprod Immunol*. 2014;104–105:20–5.
- 647 79. Deminière JM, Piazza PV, Guegan G, Abrous N, Maccari S, Moal M Le, et al. Increased locomotor response  
648 to novelty and propensity to intravenous amphetamine self-administration in adult offspring of stressed  
649 mothers. *Brain Res*. 1992;586(1):135–9.
- 650 80. Zuena AR, Mairesse J, Casolini P, Cinque C, Alemà GS, Morley-Fletcher S, et al. Prenatal restraint stress  
651 generates two distinct behavioral and neurochemical profiles in male and female rats. *PLoS One*.  
652 2008;3(5).
- 653 81. Gemmel M, Hazlett M, Bögi E, De Lacalle S, Hill LA, Kokras N, et al. Perinatal fluoxetine effects on social  
654 play, the HPA system, and hippocampal plasticity in pre-adolescent male and female rats: Interactions with  
655 pre-gestational maternal stress. *Psychoneuroendocrinology* [Internet]. 2017 Oct [cited 2018 Feb  
656 13];84:159–71. Available from: <http://www.ncbi.nlm.nih.gov/pubmed/28735226>
- 657 82. Conrad CD, Grote KA, Hobbs RJ, Ferayorni A. Sex differences in spatial and non-spatial Y-maze performance  
658 after chronic stress. *Neurobiol Learn Mem*. 2003;79(1):32–40.
- 659 83. Burke HM, Robinson CM, Wentz B, McKay J, Dexter KW, Pisansky JM, et al. Sex-specific impairment of  
660 spatial memory in rats following a reminder of predator stress. *Stress*. 2013;16(4):469–76.
- 661 84. Armario A, Nadal R. Individual differences and the characterization of animal models of psychopathology: A  
662 strong challenge and a good opportunity. *Front Pharmacol*. 2013;4 NOV(November):1–13.
- 663 85. Sprowles JLN, Hufgard JR, Gutierrez A, Bailey RA, Jablonski SA, Williams MT, et al. Perinatal exposure to the  
664 selective serotonin reuptake inhibitor citalopram alters spatial learning and memory, anxiety, depression,  
665 and startle in Sprague-Dawley rats. *Int J Dev Neurosci* [Internet]. 2016 Nov [cited 2018 Feb 12];54:39–52.  
666 Available from: <http://linkinghub.elsevier.com/retrieve/pii/S0736574816301575>
- 667 86. Jankord R, Solomon MB, Albertz J, Flak JN, Zhang R, Herman JP. Stress vulnerability during adolescent  
668 development in rats. *Endocrinology*. 2011;152(2):629–38.
- 669 87. Eiland L, Romeo RD. Stress and the developing adolescent brain. *Neuroscience*. 2013;249(212):162–71.
- 670 88. Llorente R, Miguel-Blanco C, Aisa B, Lachize S, Borcel E, Meijer OC, et al. Long Term Sex-Dependent  
671 Psychoneuroendocrine Effects of Maternal Deprivation and Juvenile Unpredictable Stress in Rats. *J*  
672 *Neuroendocrinol*. 2011;23(4):329–44.
- 673 89. Calhoun ME, Jucker M, Martin LJ, Thinakaran G, Price DL, Mouton PR. Comparative evaluation of  
674 synaptophysin-based methods for quantification of synapses. *J Neurocytol* [Internet]. 1996 [cited 2021

- 675 May 25];25(1):821–8. Available from: <https://link.springer.com/article/10.1007/BF02284844>
- 676 90. Yagi S, Galea LAM. Sex differences in hippocampal cognition and neurogenesis [Internet]. Vol. 44,  
677 Neuropsychopharmacology. Nature Publishing Group; 2019 [cited 2021 May 25]. p. 200–13. Available  
678 from: <https://doi.org/10.1038/s41386-018-0208-4>
- 679 91. Afadlal S, Polaboon N, Surakul P, Govitrapong P, Jutapakdeegul N. Prenatal stress alters presynaptic marker  
680 proteins in the hippocampus of rat pups. *Neurosci Lett*. 2010;470(1):24–7.
- 681 92. Biala YN, Bogoch Y, Bejar C, Linial M, Weinstock M. Prenatal stress diminishes gender differences in  
682 behavior and in expression of hippocampal synaptic genes and proteins in rats. *Hippocampus*.  
683 2011;21(10):1114–25.
- 684 93. Gemmel M, Rayen I, van Donkelaar E, Loftus T, Steinbusch HW, Kokras N, et al. Gestational stress and  
685 fluoxetine treatment differentially affect plasticity, methylation and serotonin levels in the PFC and  
686 hippocampus of rat dams. *Neuroscience*. 2016 Jul;327:32–43.
- 687 94. Carvalho-Netto EF, Myers B, Jones K, Solomon MB, Herman JP. Sex differences in synaptic plasticity in  
688 stress-responsive brain regions following chronic variable stress. *Physiol Behav*. 2011;104(2):242–7.
- 689 95. Cui Y, Cao K, Lin H, Cui S, Shen C, Wen W, et al. Early-Life Stress Induces Depression-Like Behavior and  
690 Synaptic-Plasticity Changes in a Maternal Separation Rat Model: Gender Difference and Metabolomics  
691 Study. *Front Pharmacol*. 2020;11(February):1–13.

692

## 693 **FIGURE CAPTIONS**

694 **Figure 1.** Chemical structure of mirtazapine.

695 **Figure 2.** Schedule of the experiment. G- gestation day; PP-post-partum day; EPM- elevated plus maze; FST- forced  
696 swim test.

697 **Figure 3.** Grimace scale test. Data represent mean  $\pm$  SEM. n= 6-7 animals/group.

698 **Figure 4.** Maternal behavior. (A) total time spent nursing, (B) percentage of passive nursing and blanket nursing out  
699 of total time spent nursing. Data represent mean  $\pm$  SEM. n= 6-10 animals/group. \*p<0.05; m-compared to both  
700 mirtazapine groups.

701 **Figure 5.** Percentage of distance travelled in individual arms of elevated plus maze by juvenile animals. (A) open arm  
702 distance, (B) closed arm distance. Data represent mean  $\pm$  SEM. n= 7-8 animals/group. MIR- mirtazapine; \*p<0.05.

703 **Figure 6.** Elevated plus maze of adolescent offspring. (A) total distance travelled, (B) open arm time percentage, (C)  
704 closed arm percentage. Data represent mean  $\pm$  SEM. n= 7-10 animals/group. m- compared to both mirtazapine  
705 groups; s- compared to stress  $\times$  vehicle group; ns- compared to both non-stress groups; + - marginal significance;  
706 \* $p \leq 0.05$ .

707 **Figure 7.** Forced swim test of adolescent offspring. (A) time spent floating, (B) time spent swimming, (C) time spent  
708 climbing. n= 7-11 animals/group. \*\* $p \leq 0.01$ .

709 **Figure 8.** Y-maze of adolescent offspring. (A) total distance travelled, (B) percentage of spontaneous alterations.  
710 Data represent mean  $\pm$  SEM. n= 5-8 animals/group. a- compared to non-stress  $\times$  mirtazapine, b- compared to stress  
711  $\times$  vehicle, c-compared to stress  $\times$  mirtazapine, + - marginal significance, \* $p \leq 0.05$ , \*\* $p \leq 0.01$ .

712 **Figure 9.** Optical density of synaptophysin in hippocampus. (A) Ca3 area, (B) Ca4 area, (C) dentate gyrus area. Data  
713 represent mean  $\pm$  SEM. n= 5-8.

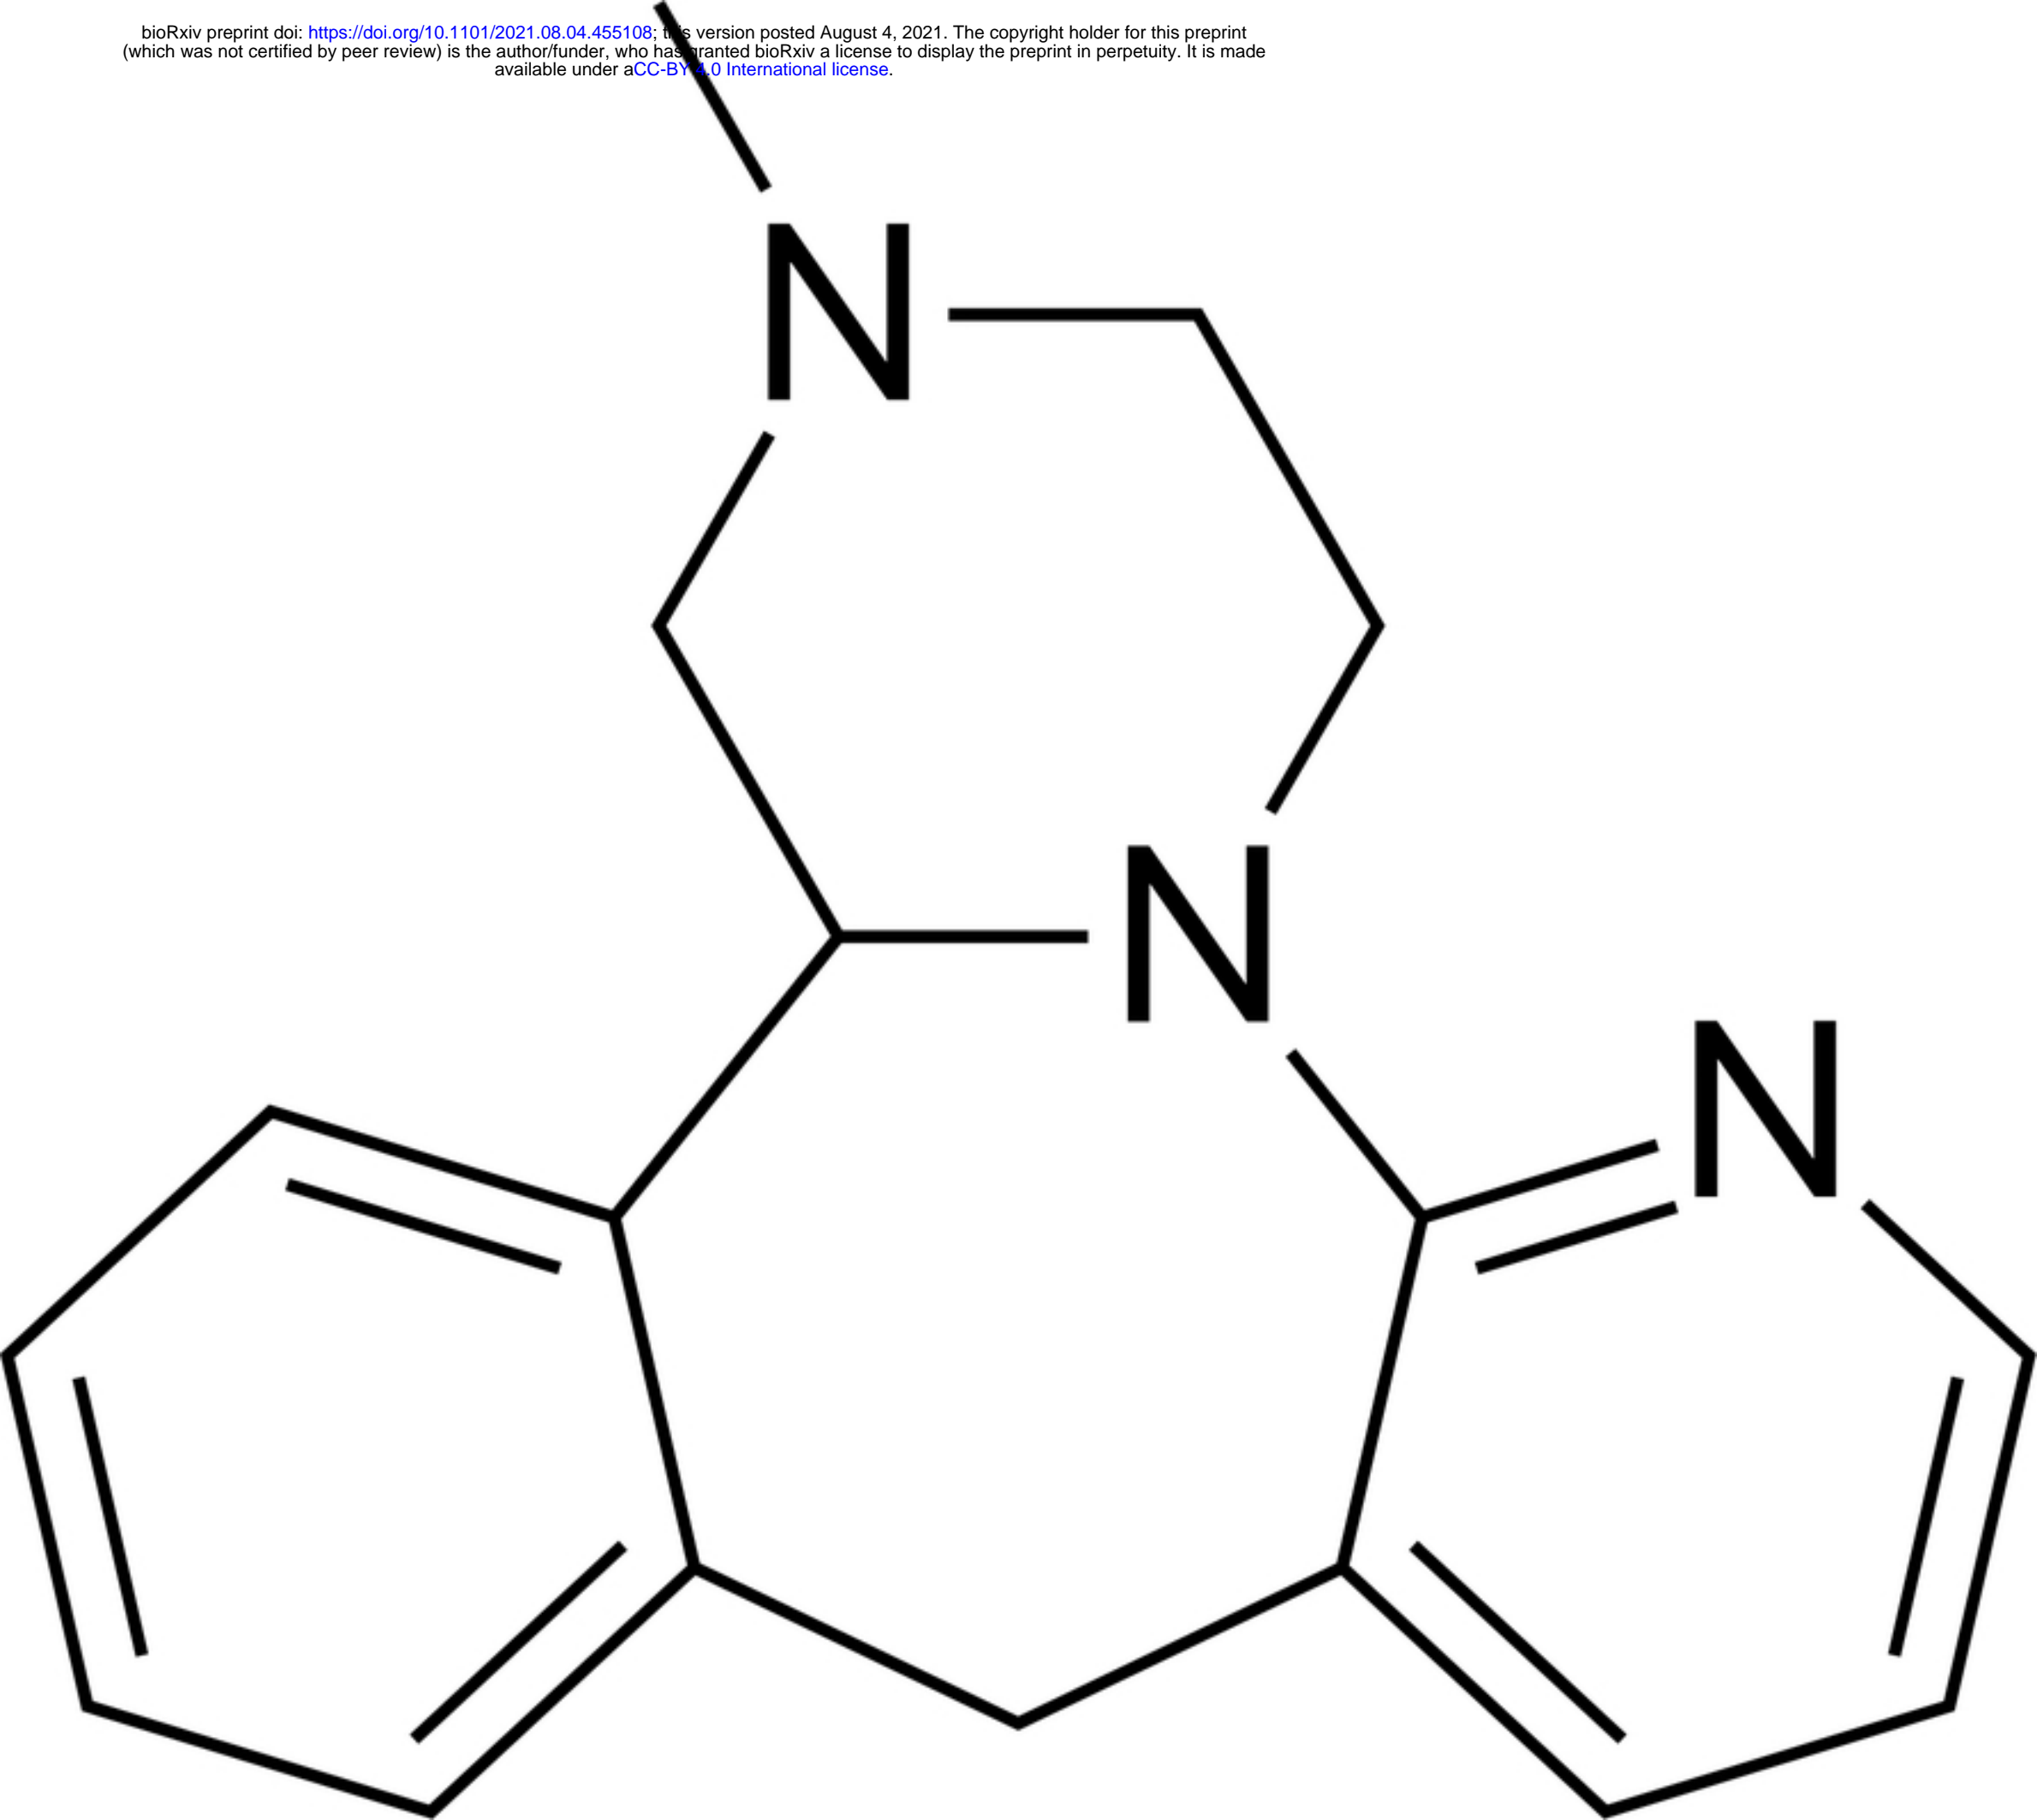

# MIRTAZAPINE ADMINISTRATION

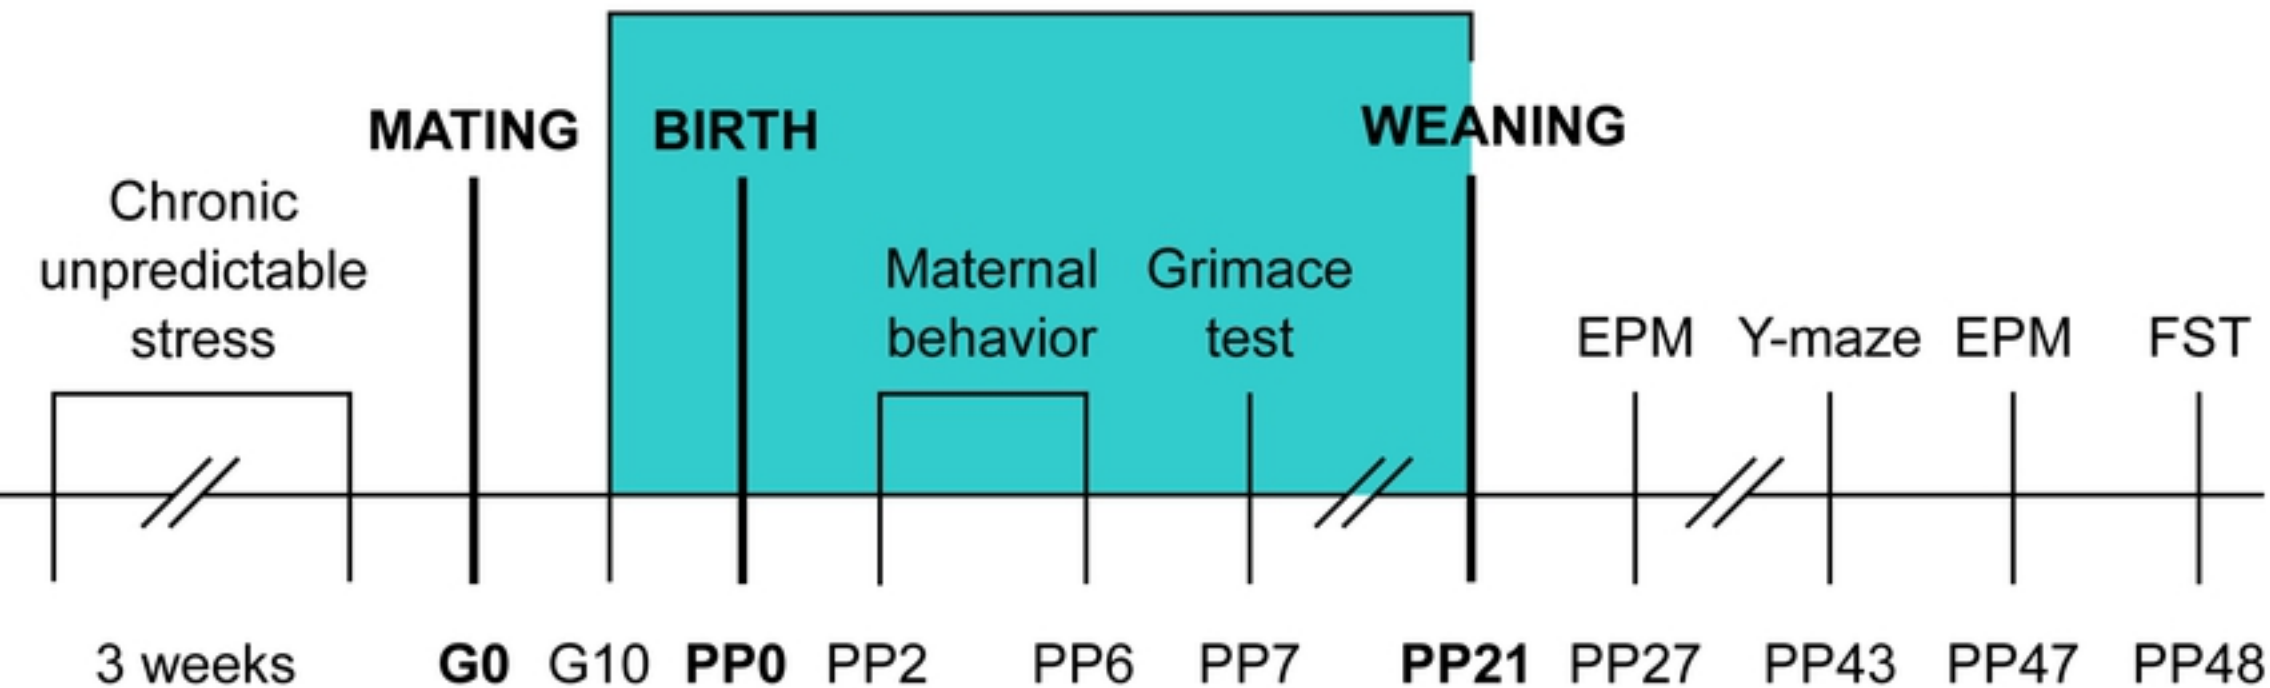

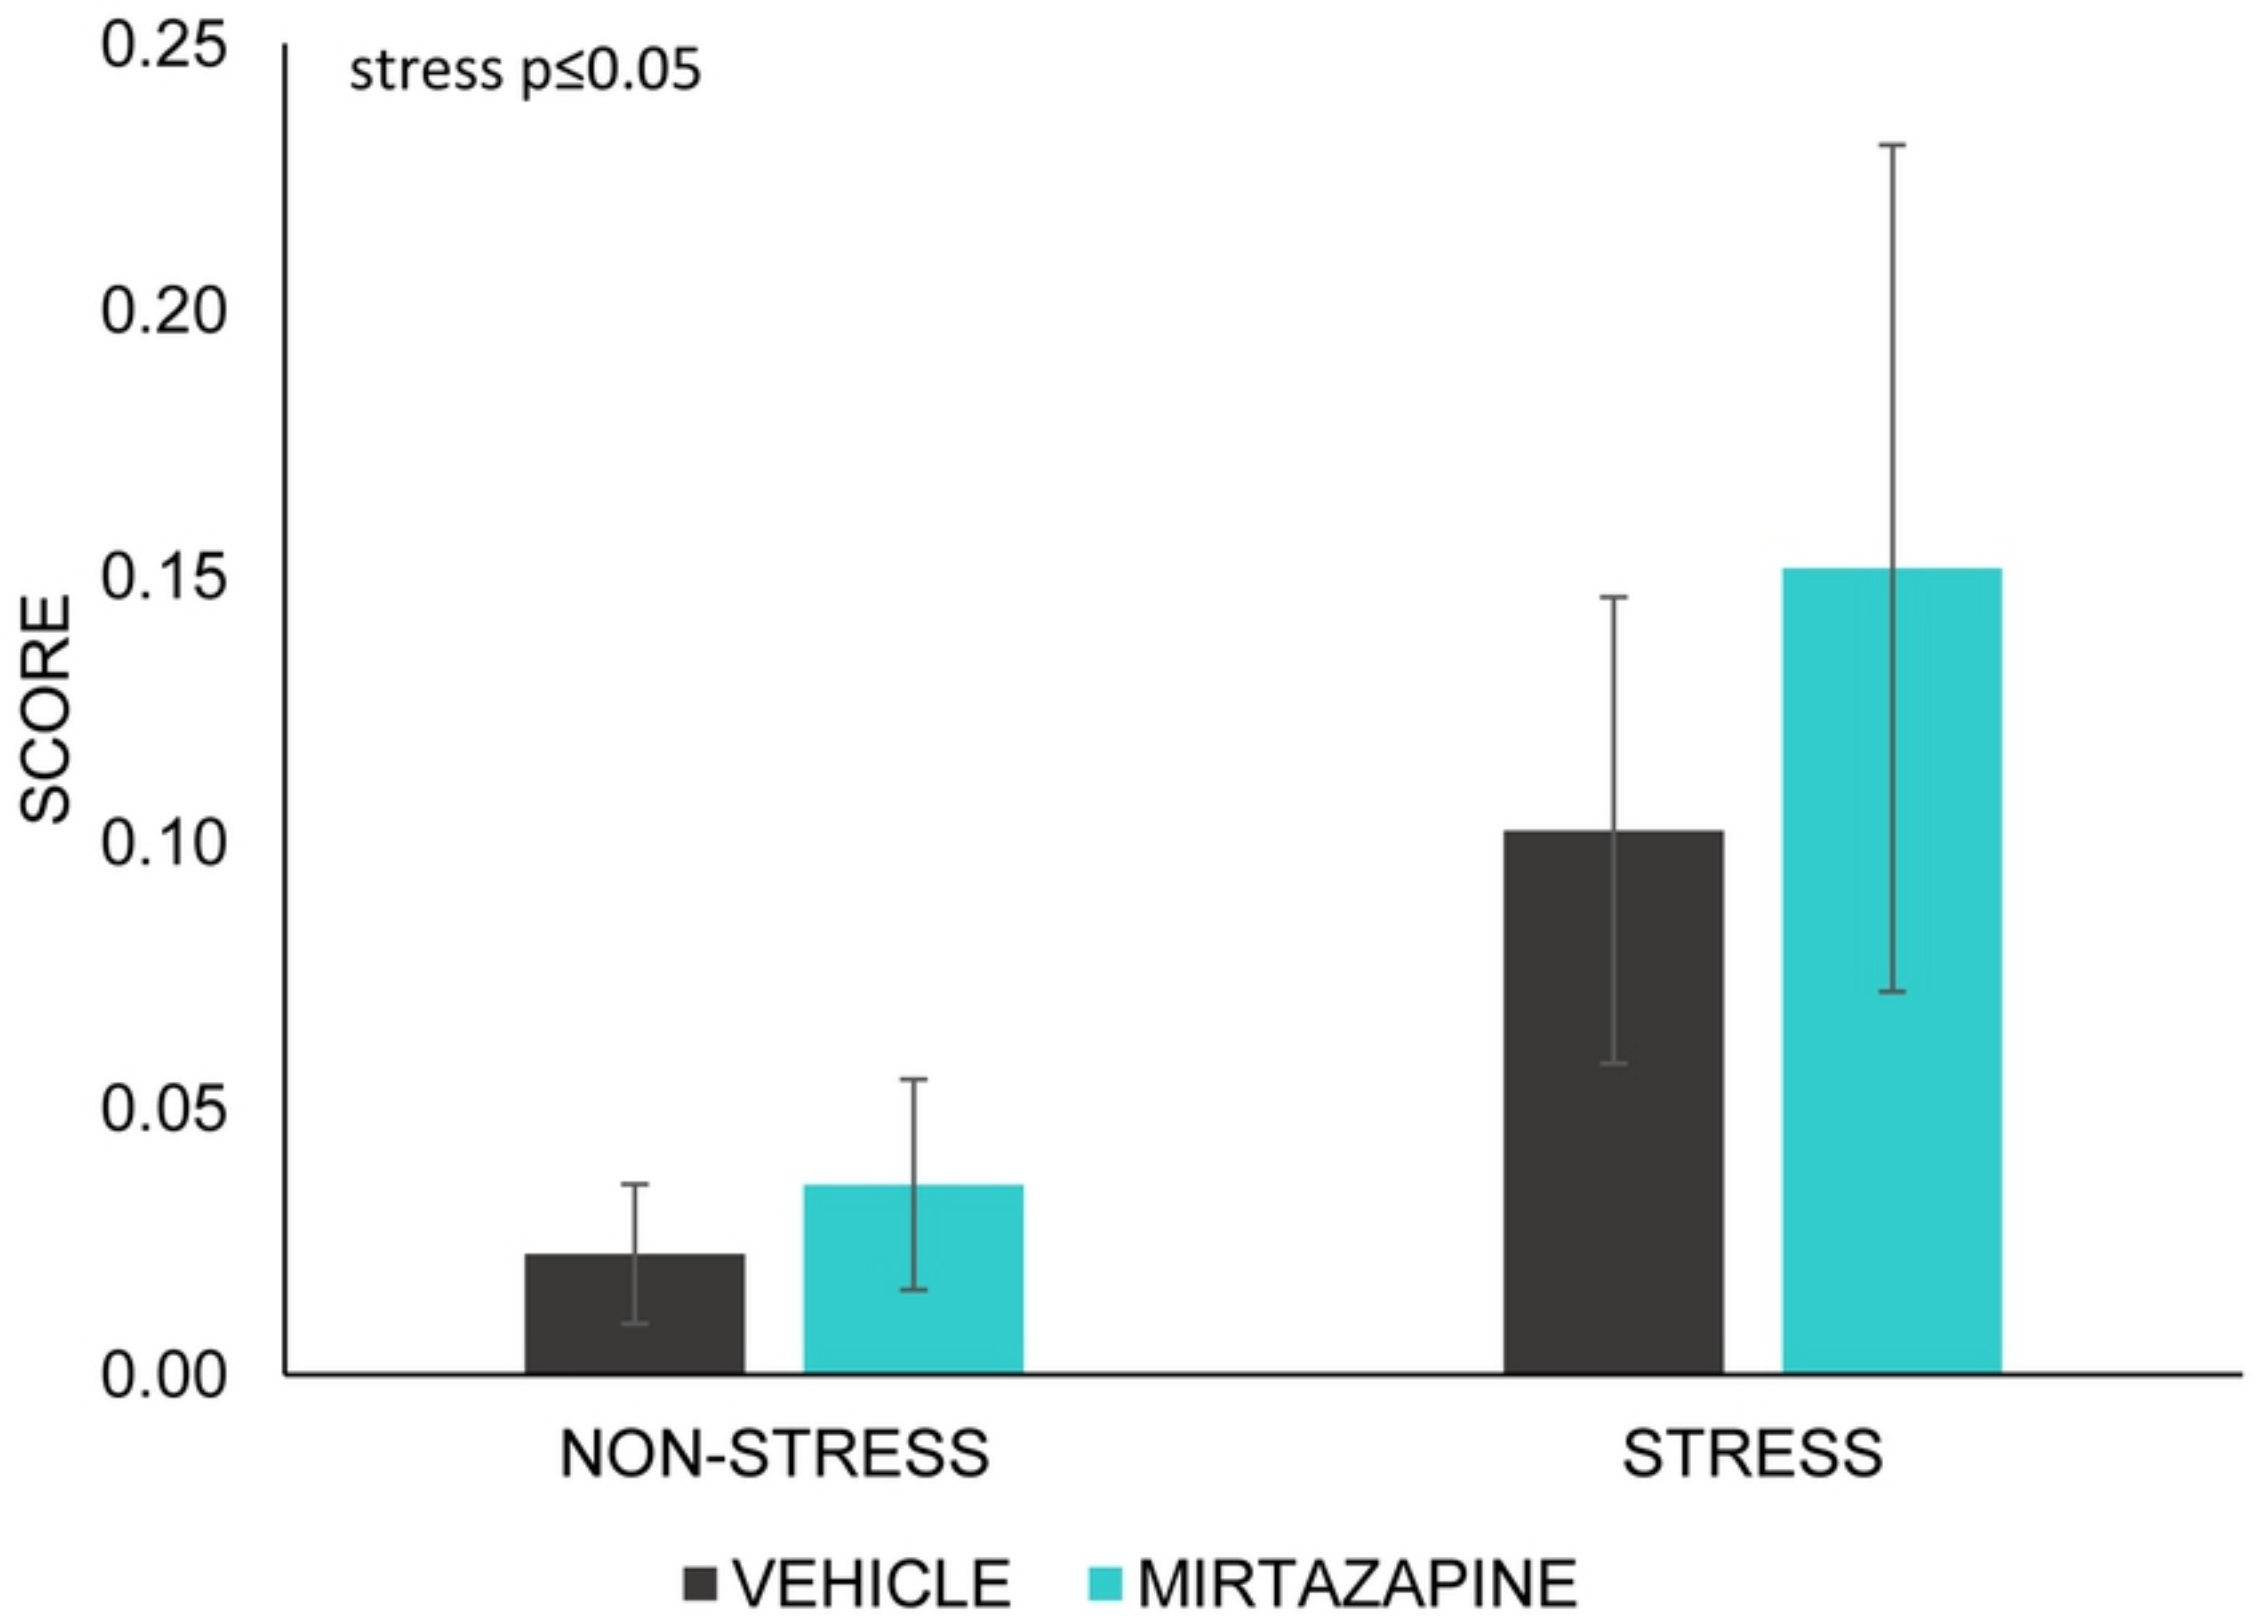

**A** ♀ stress × mirtazapine  $p \leq 0.05$

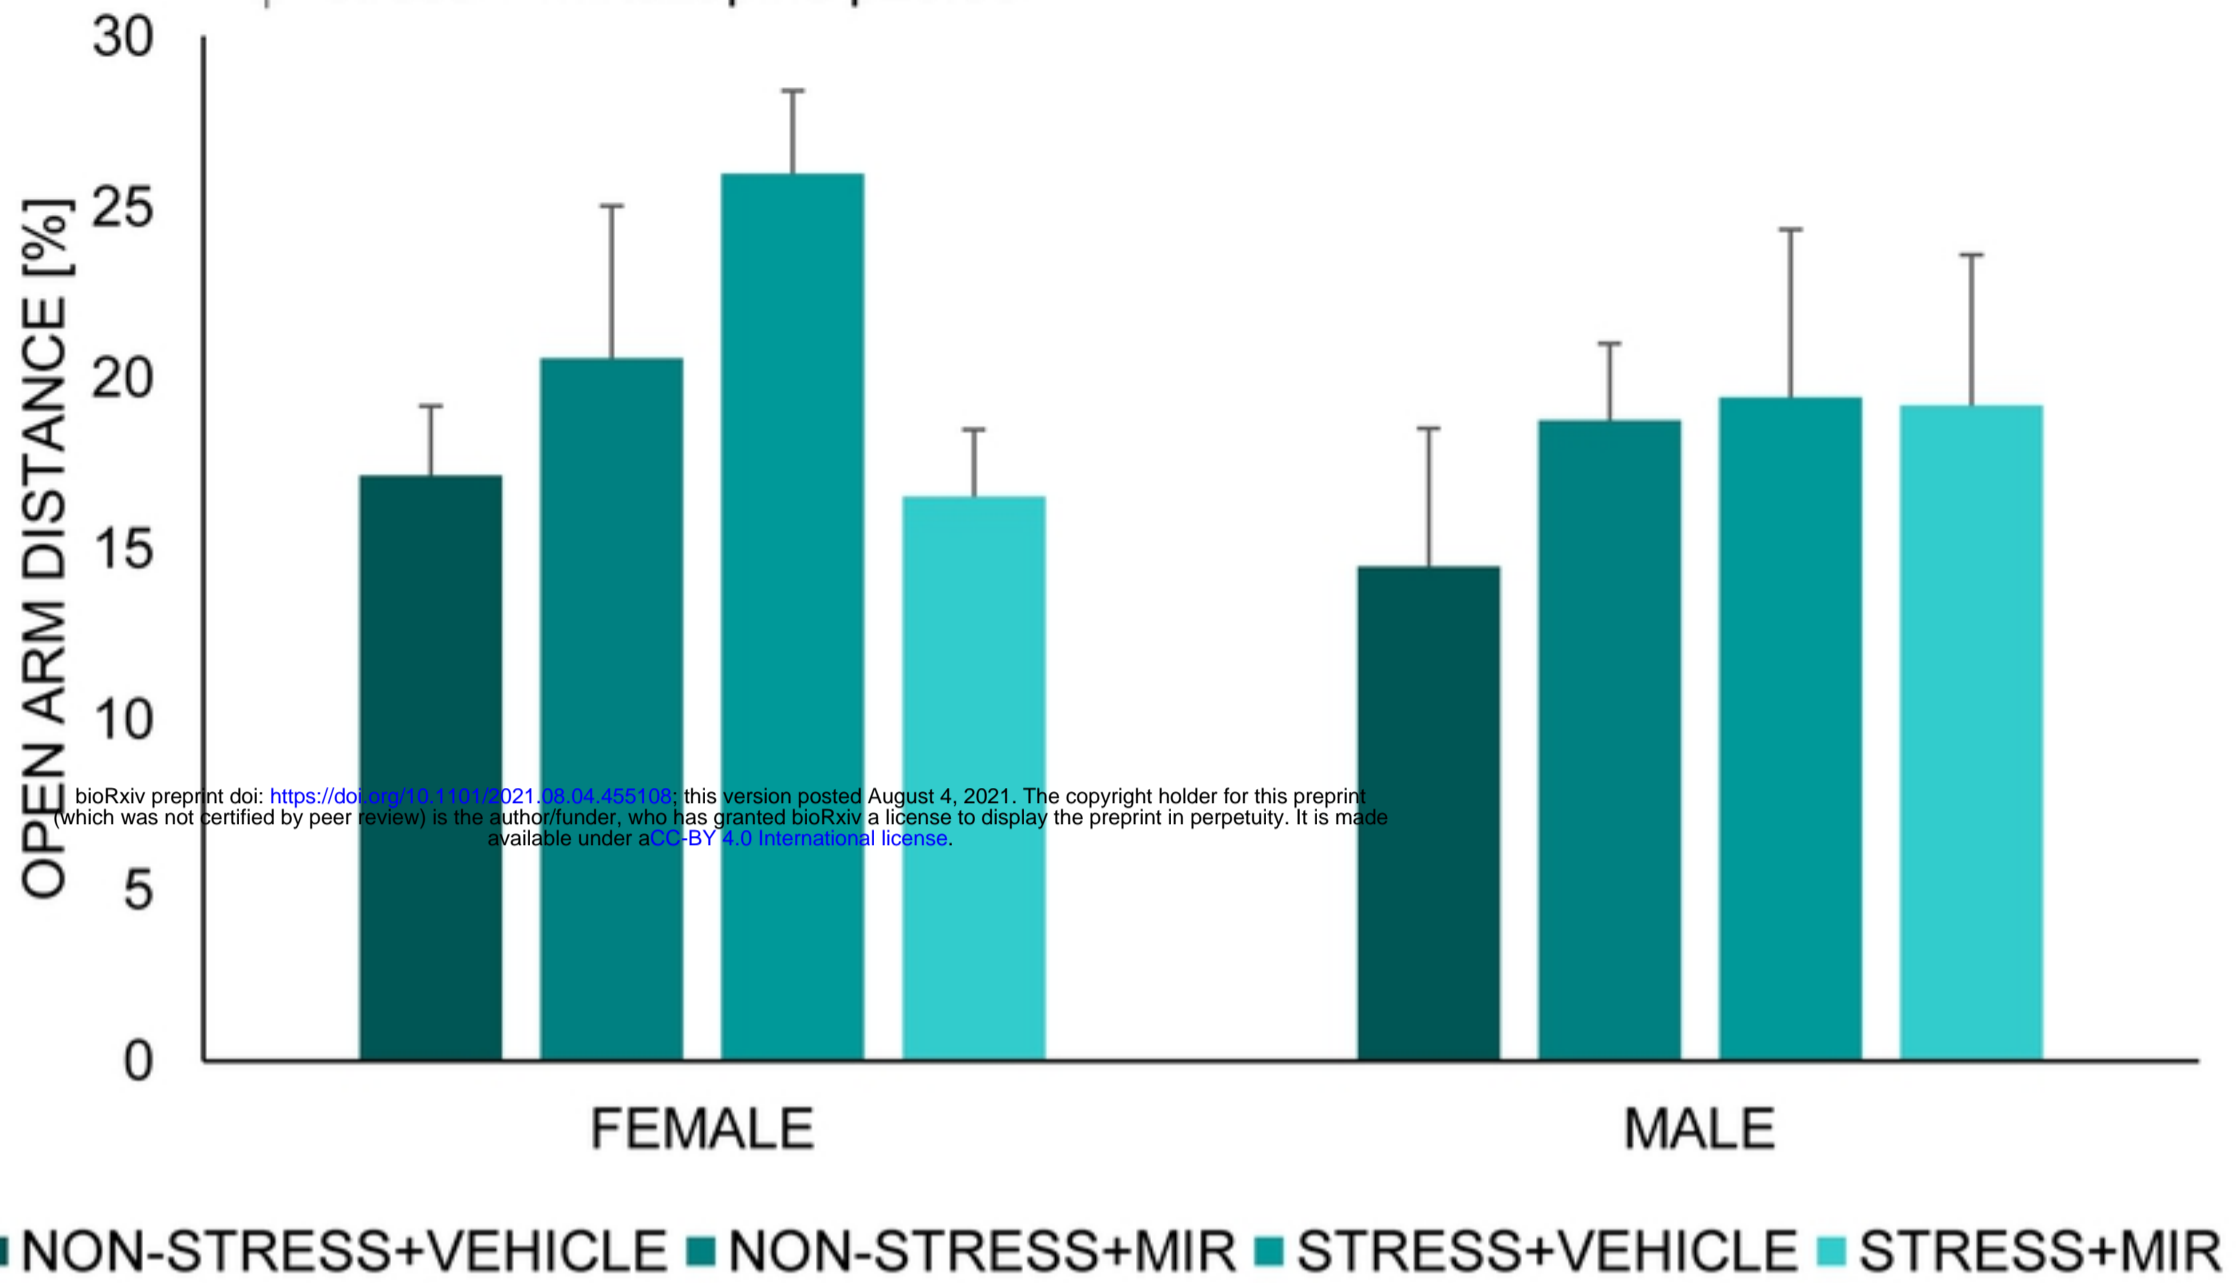

**B** ♀ stress × mirtazapine  $p \leq 0.01$

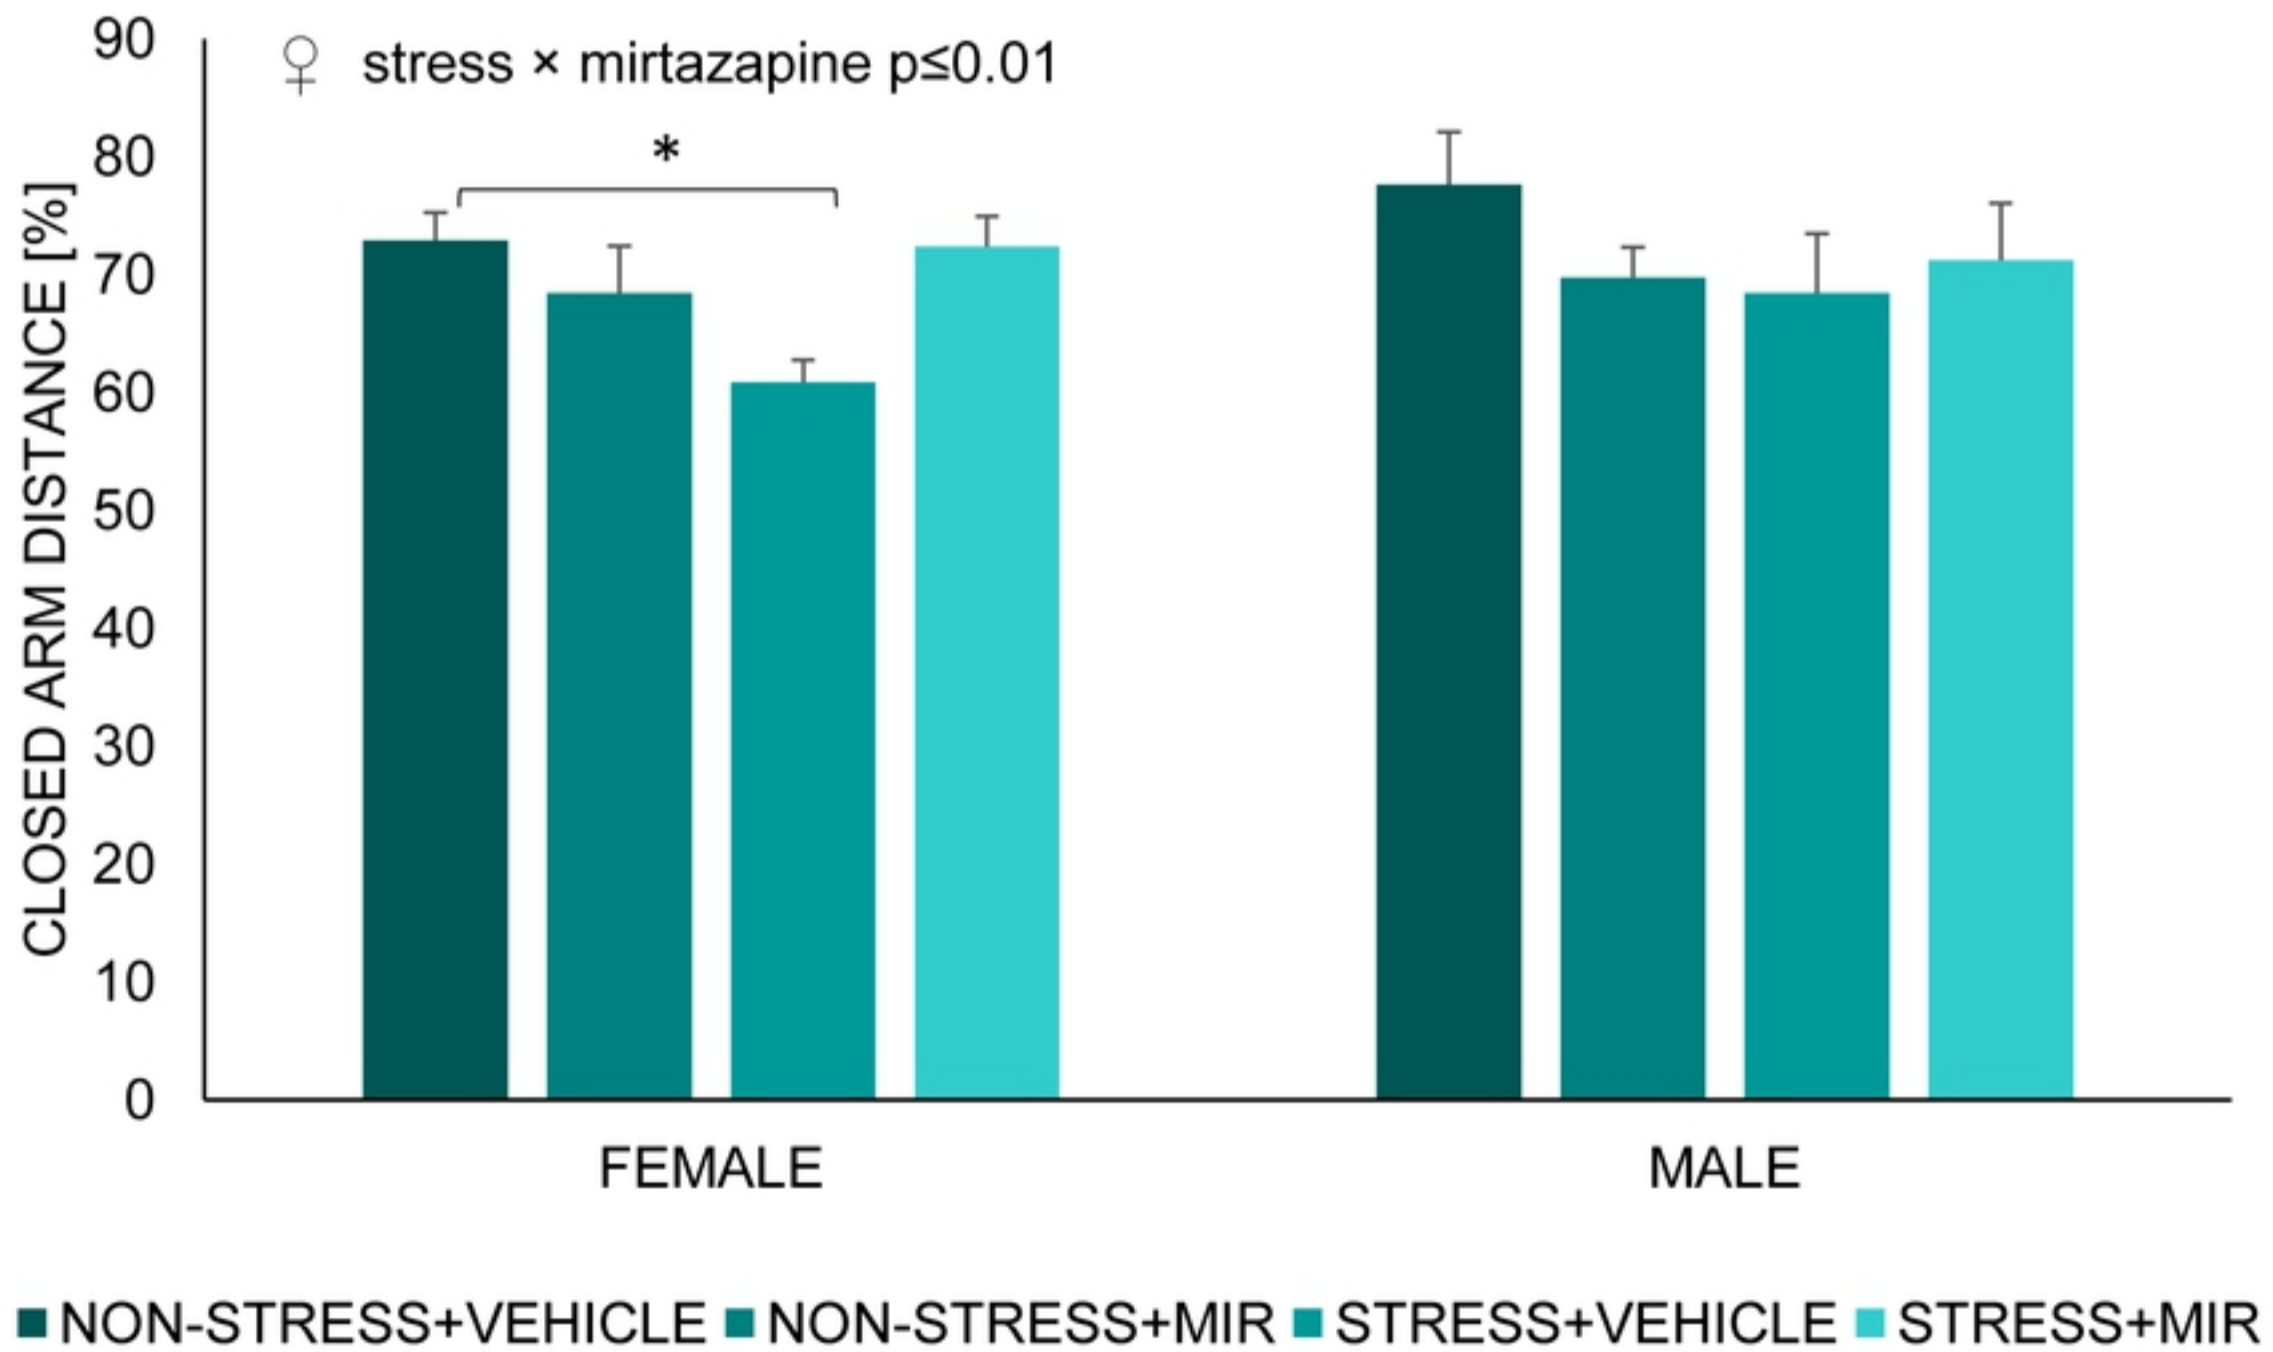

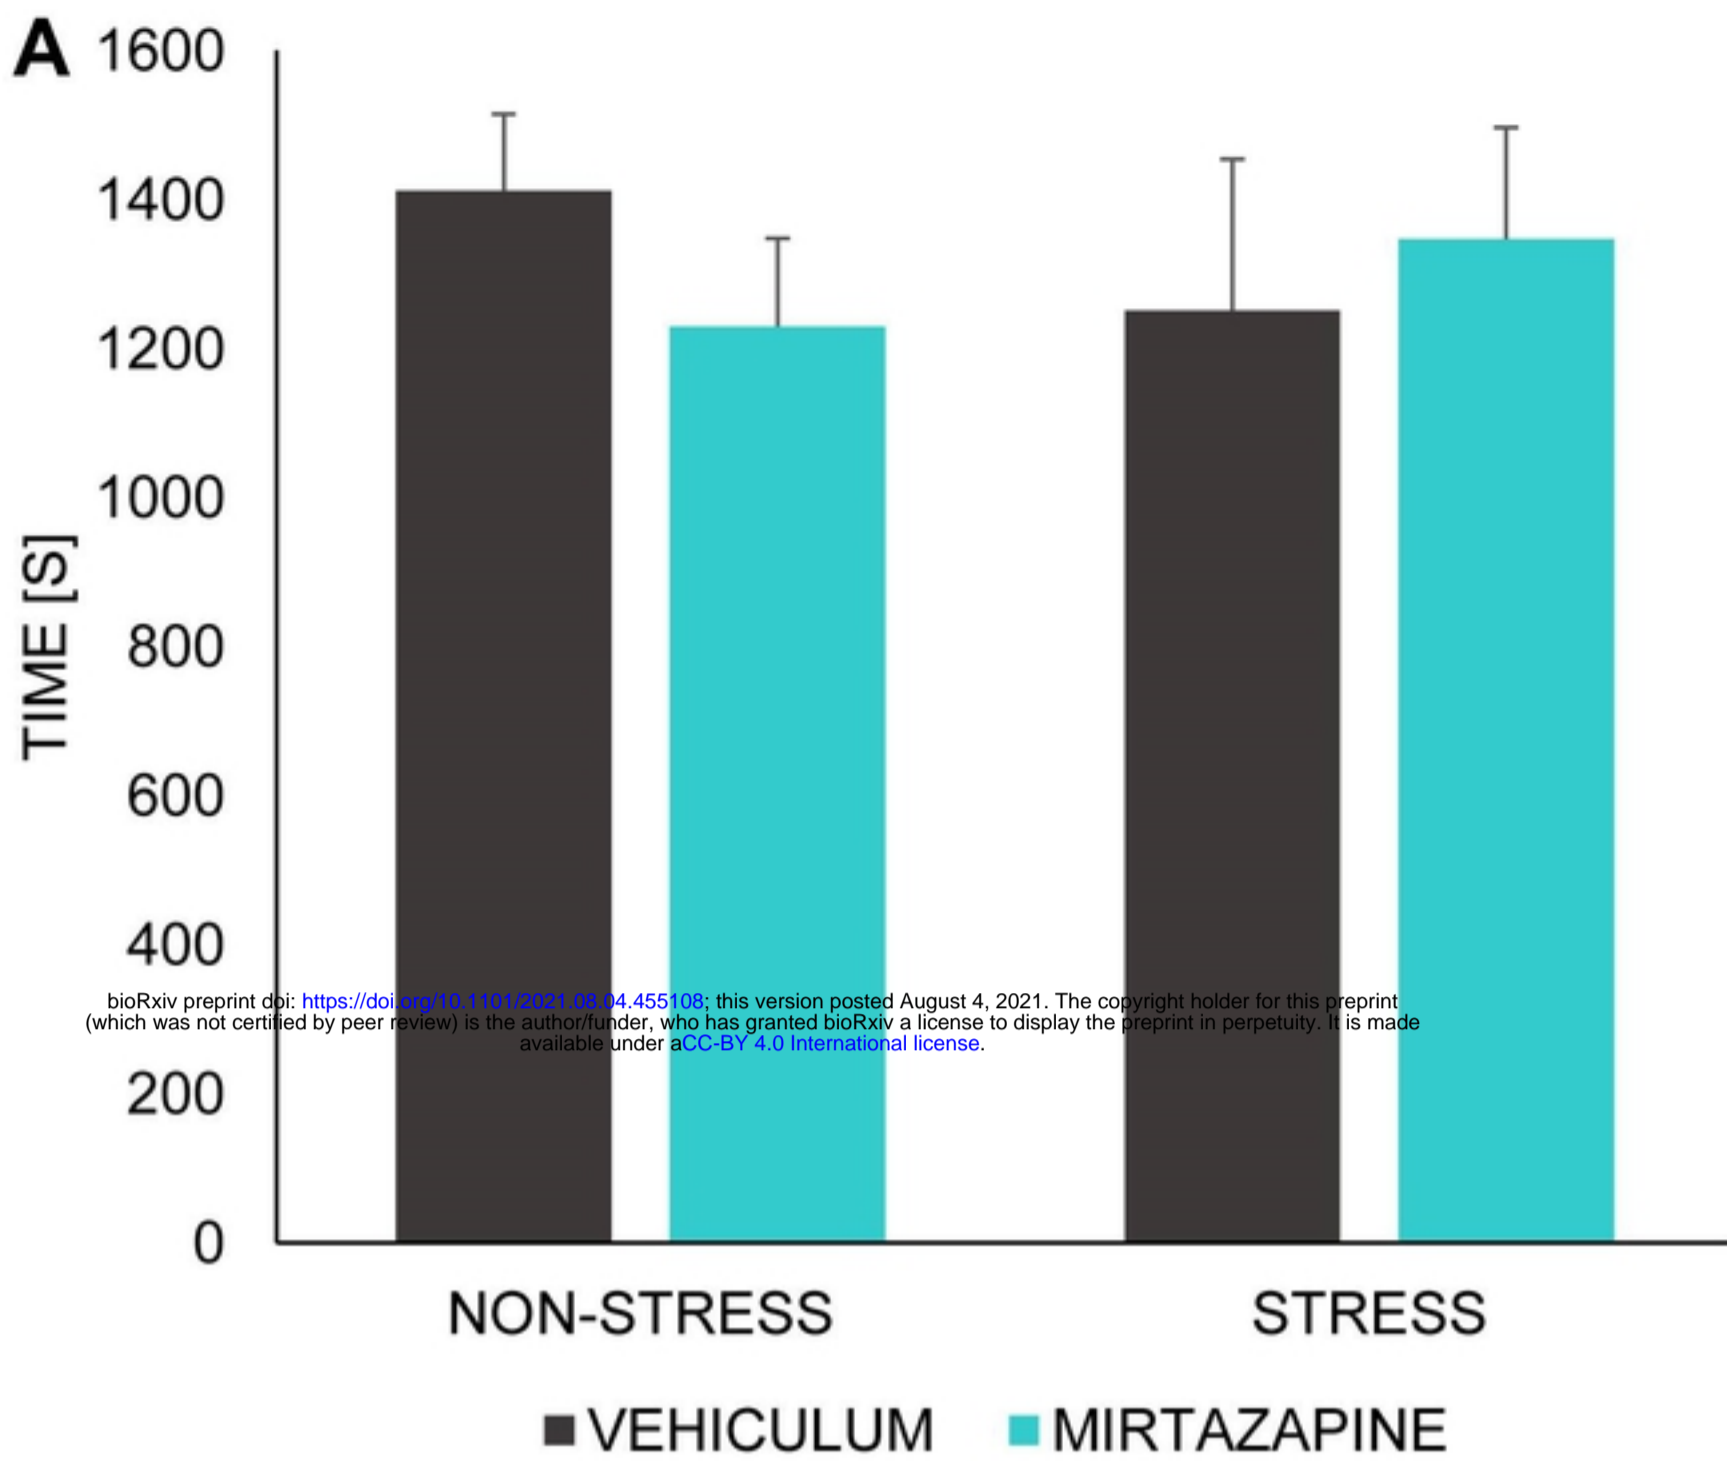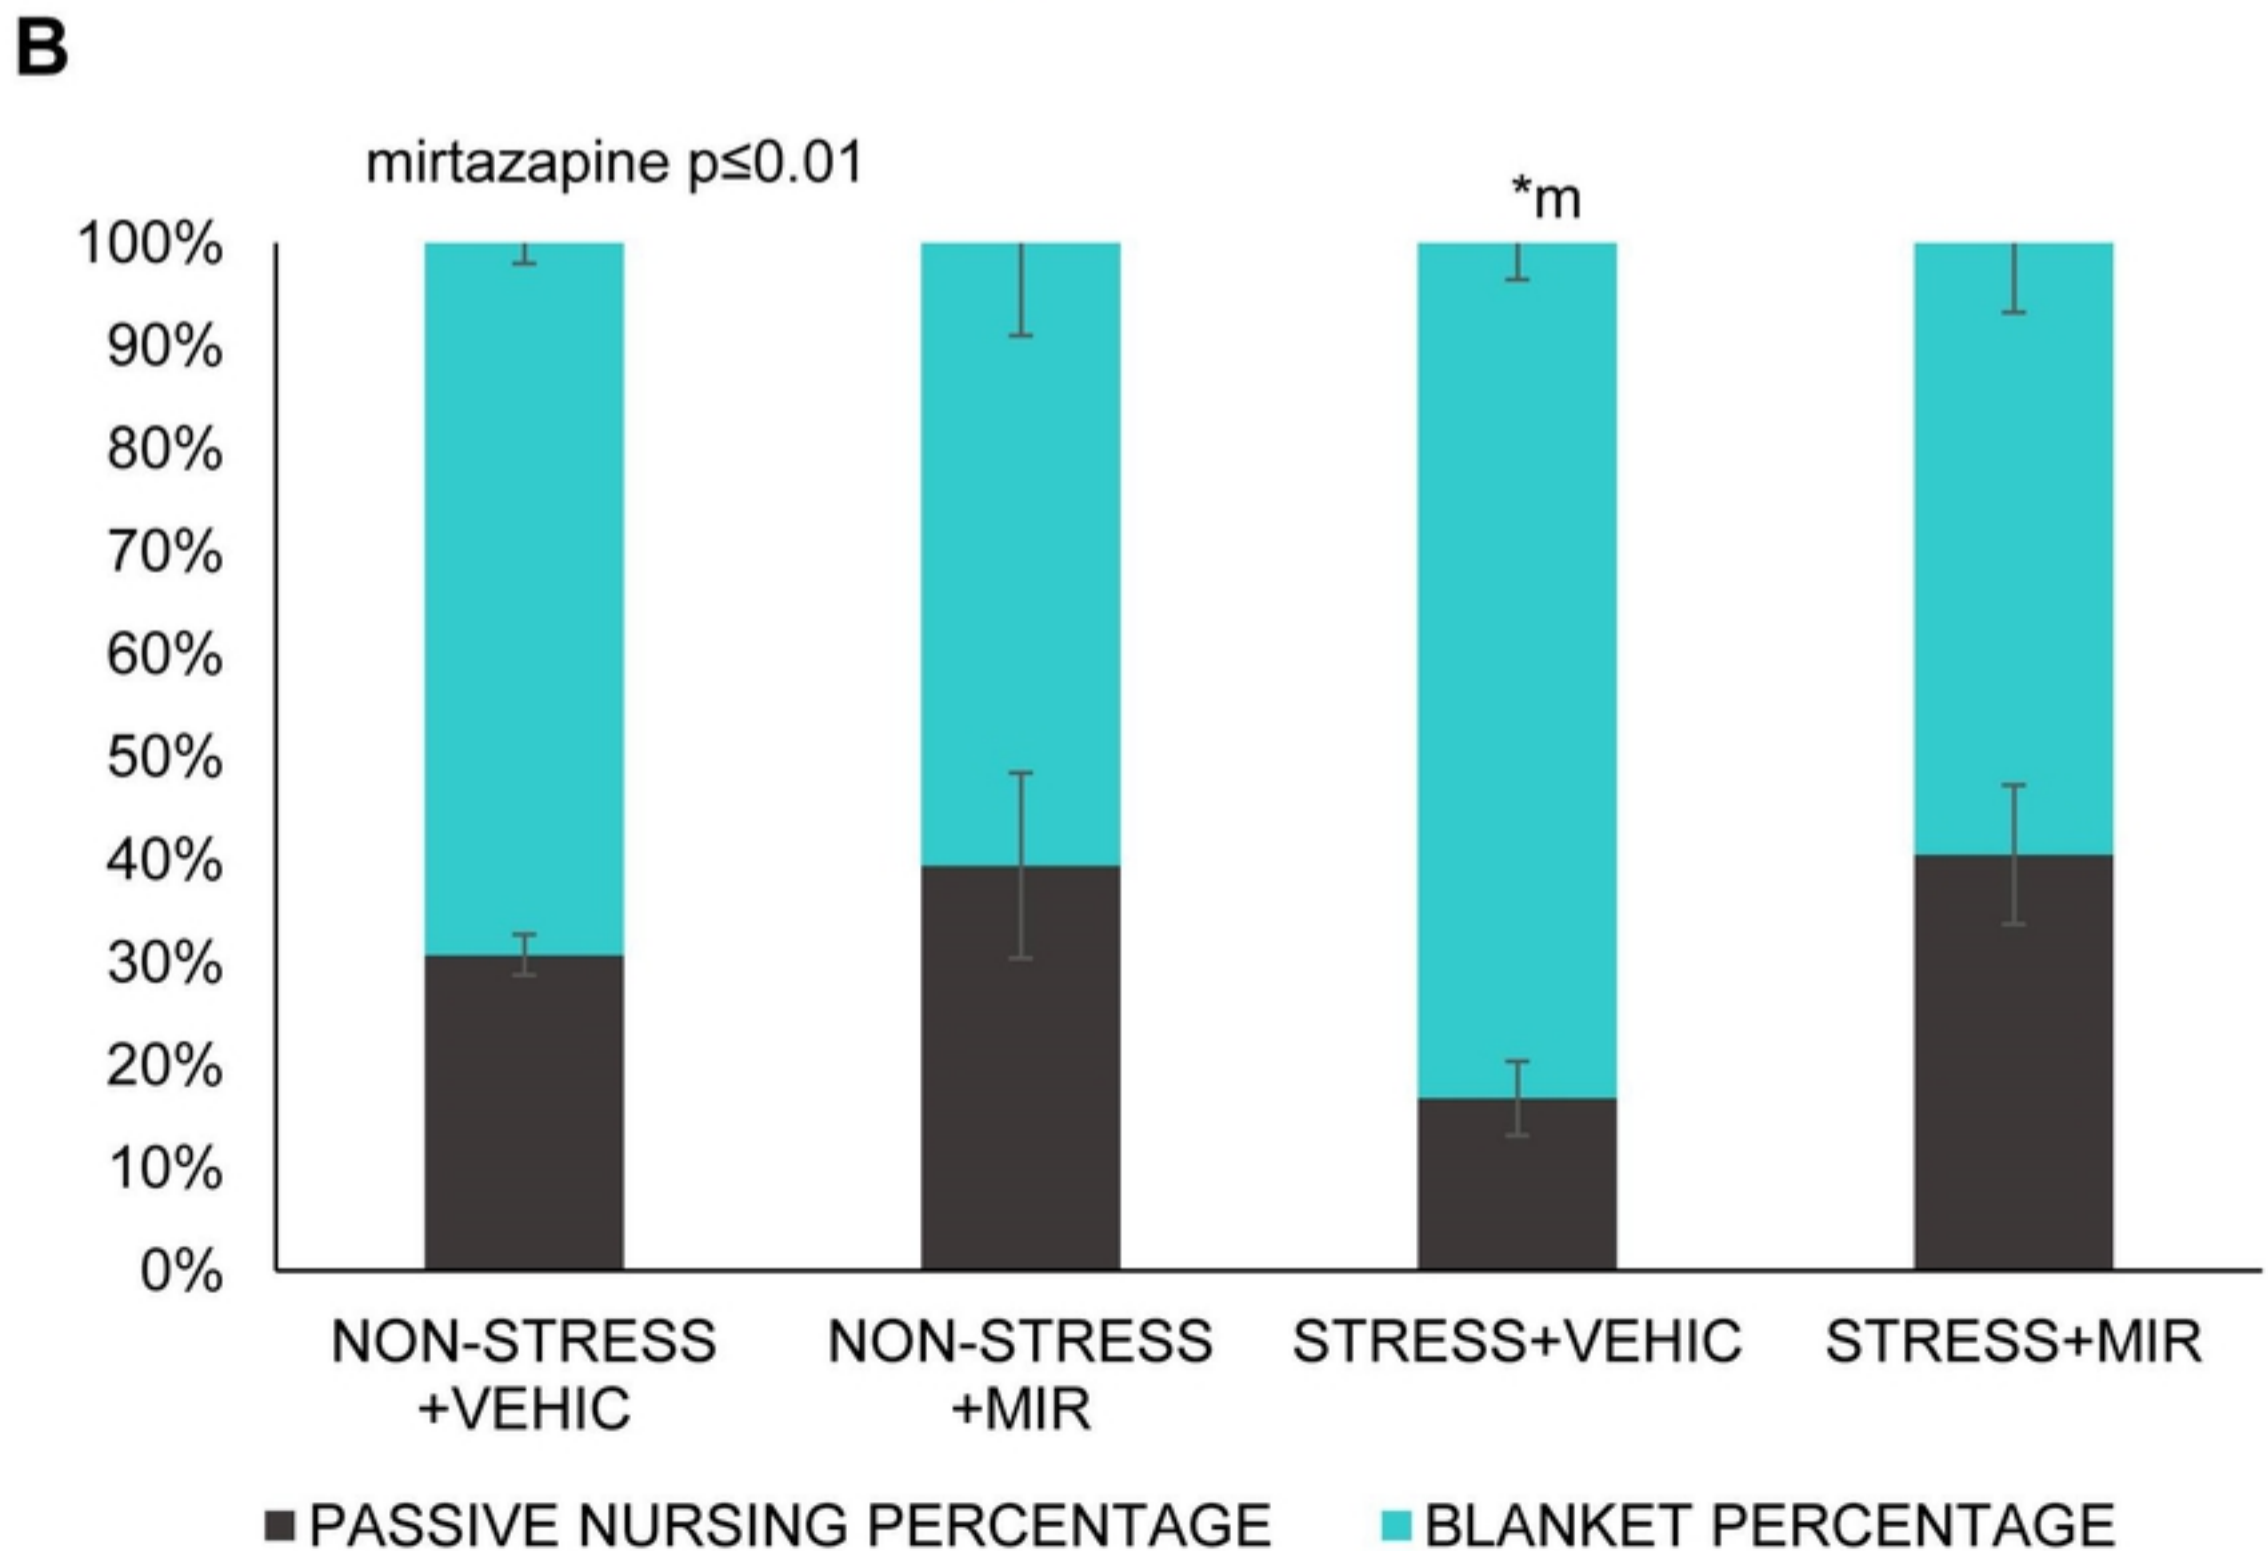



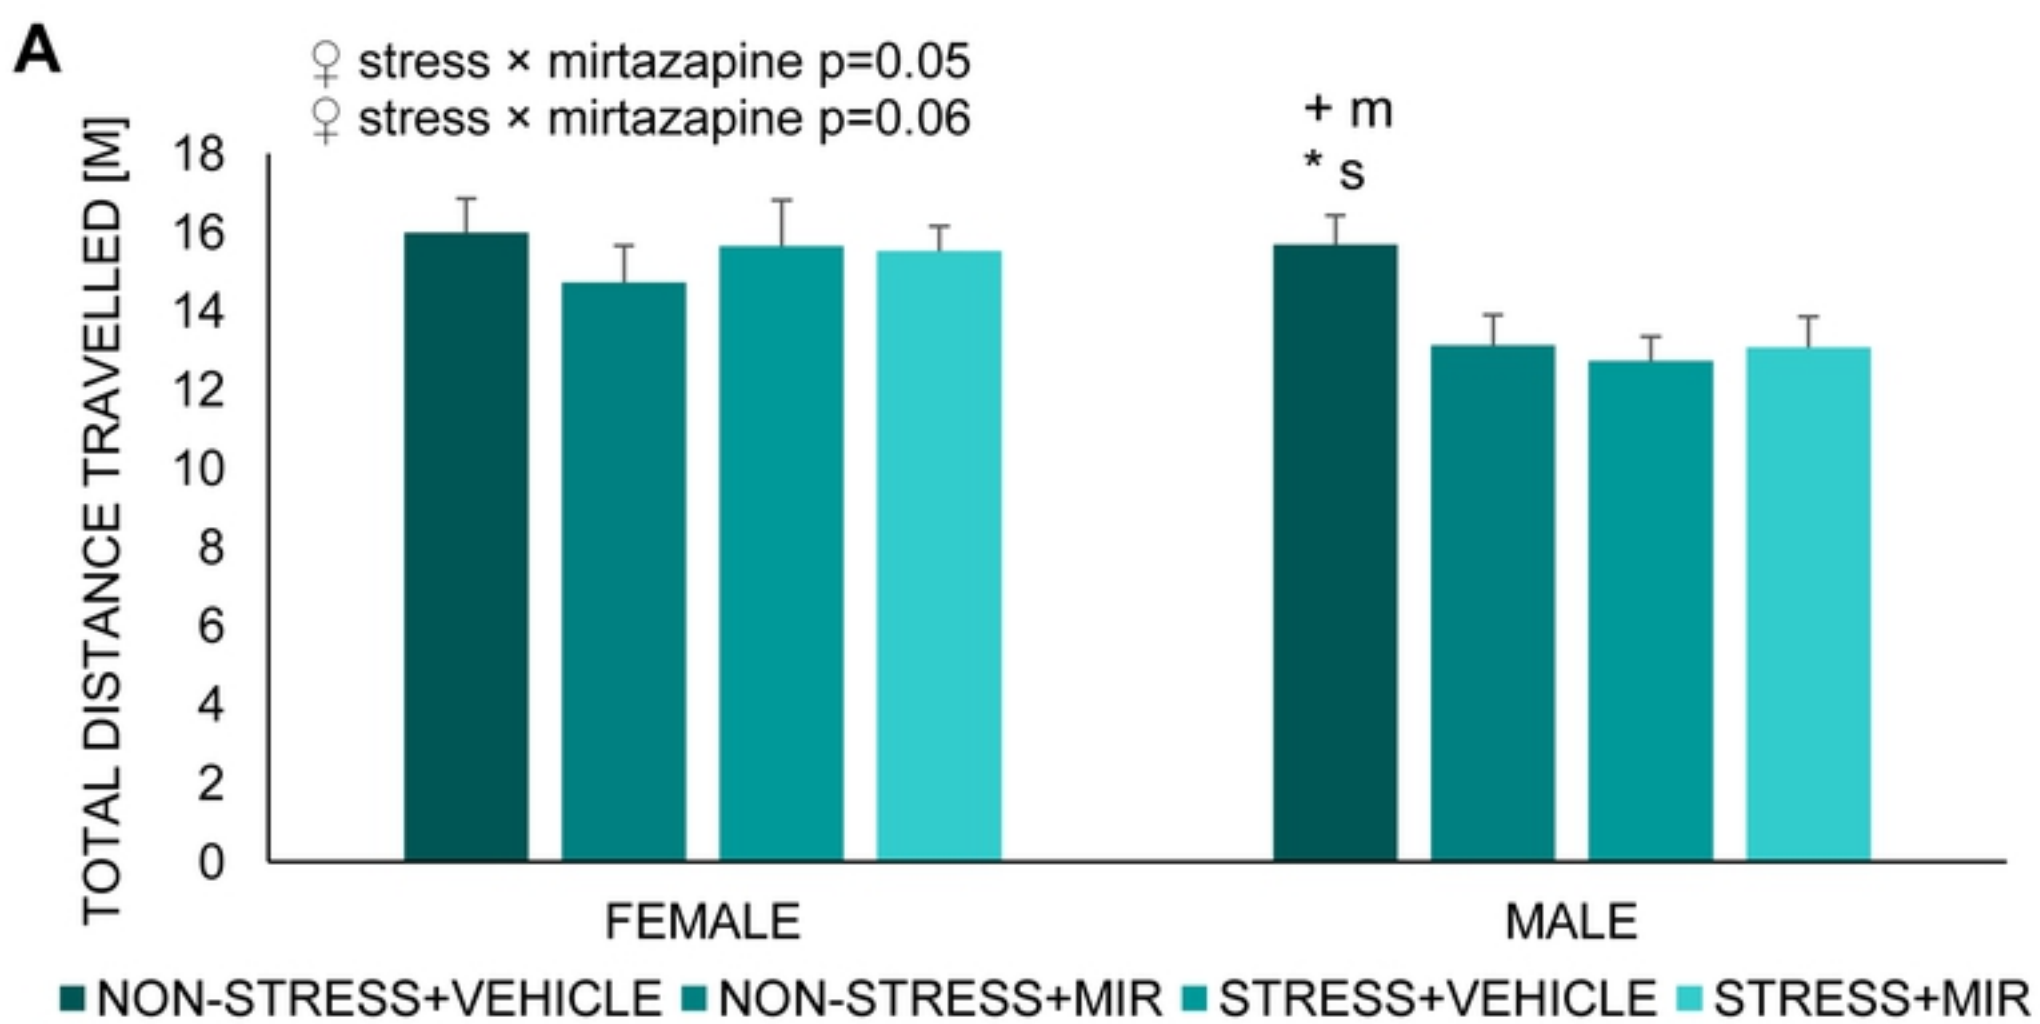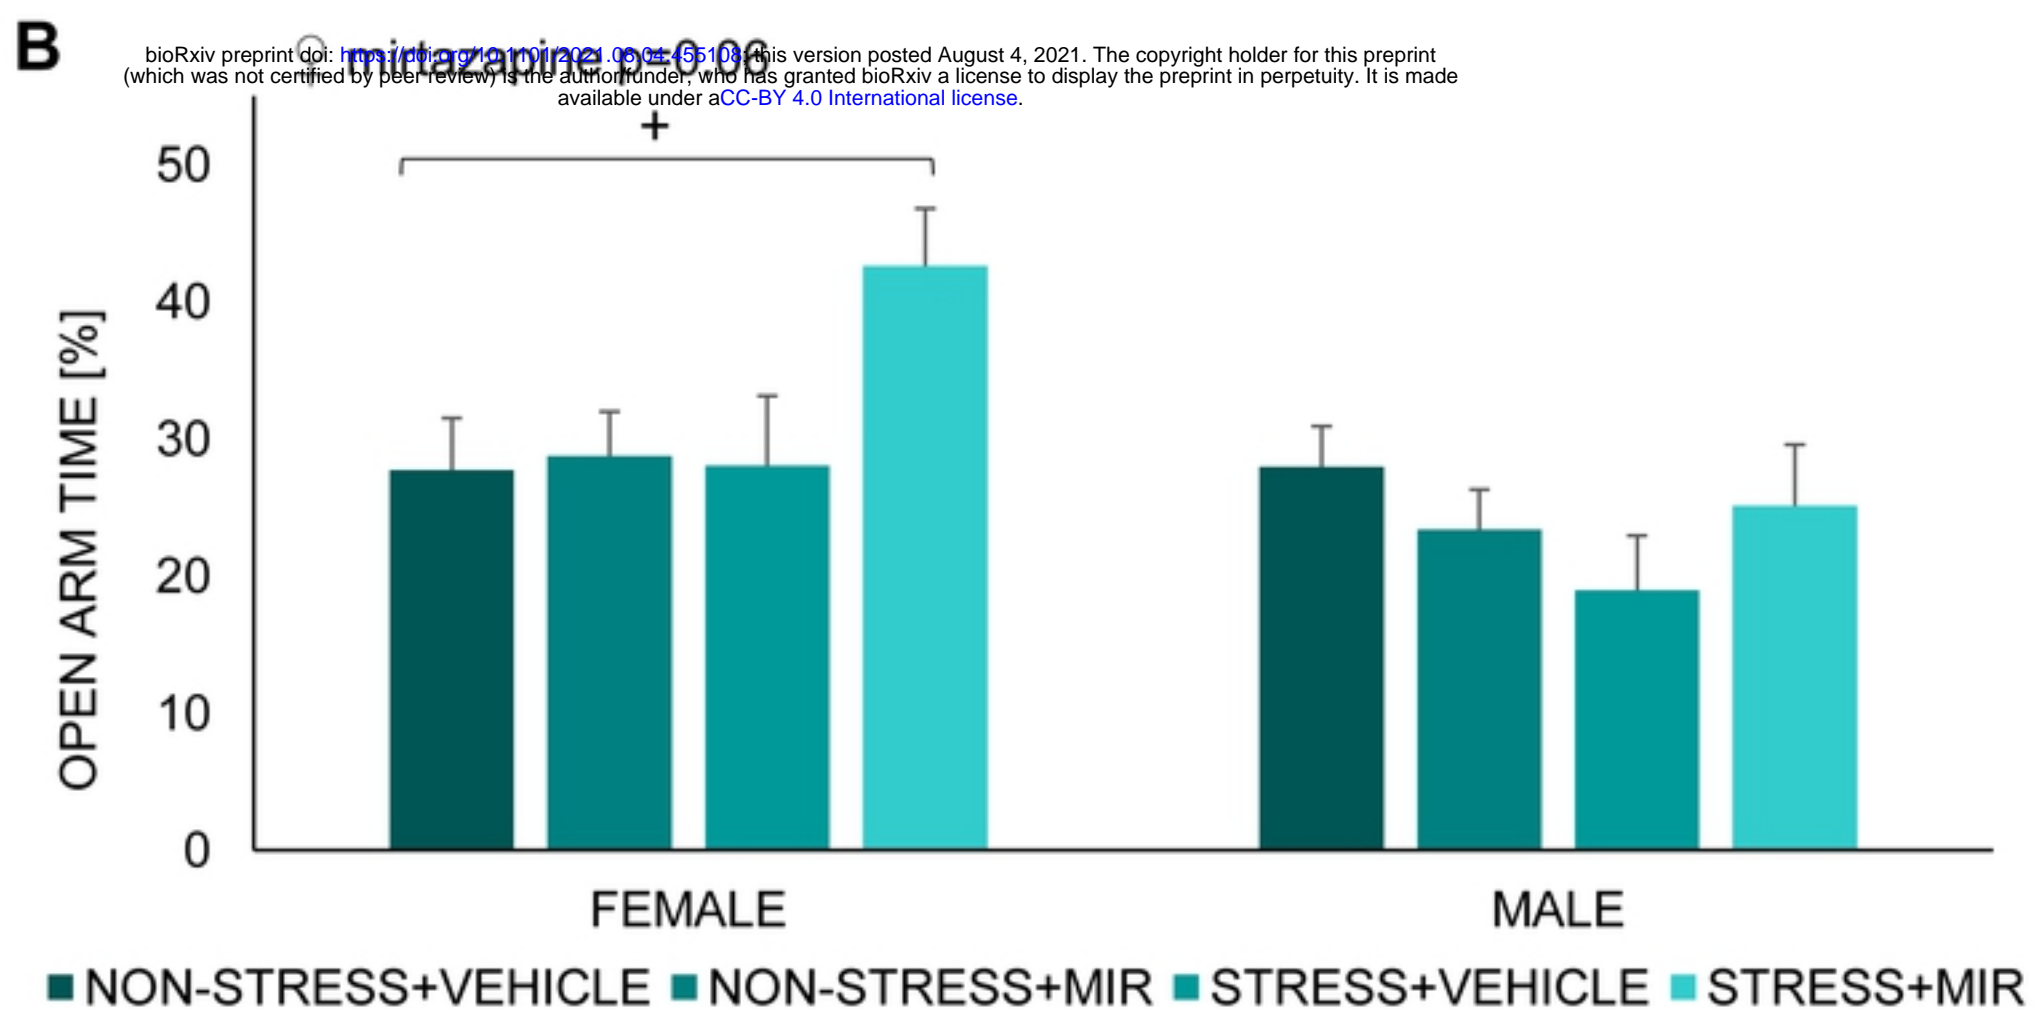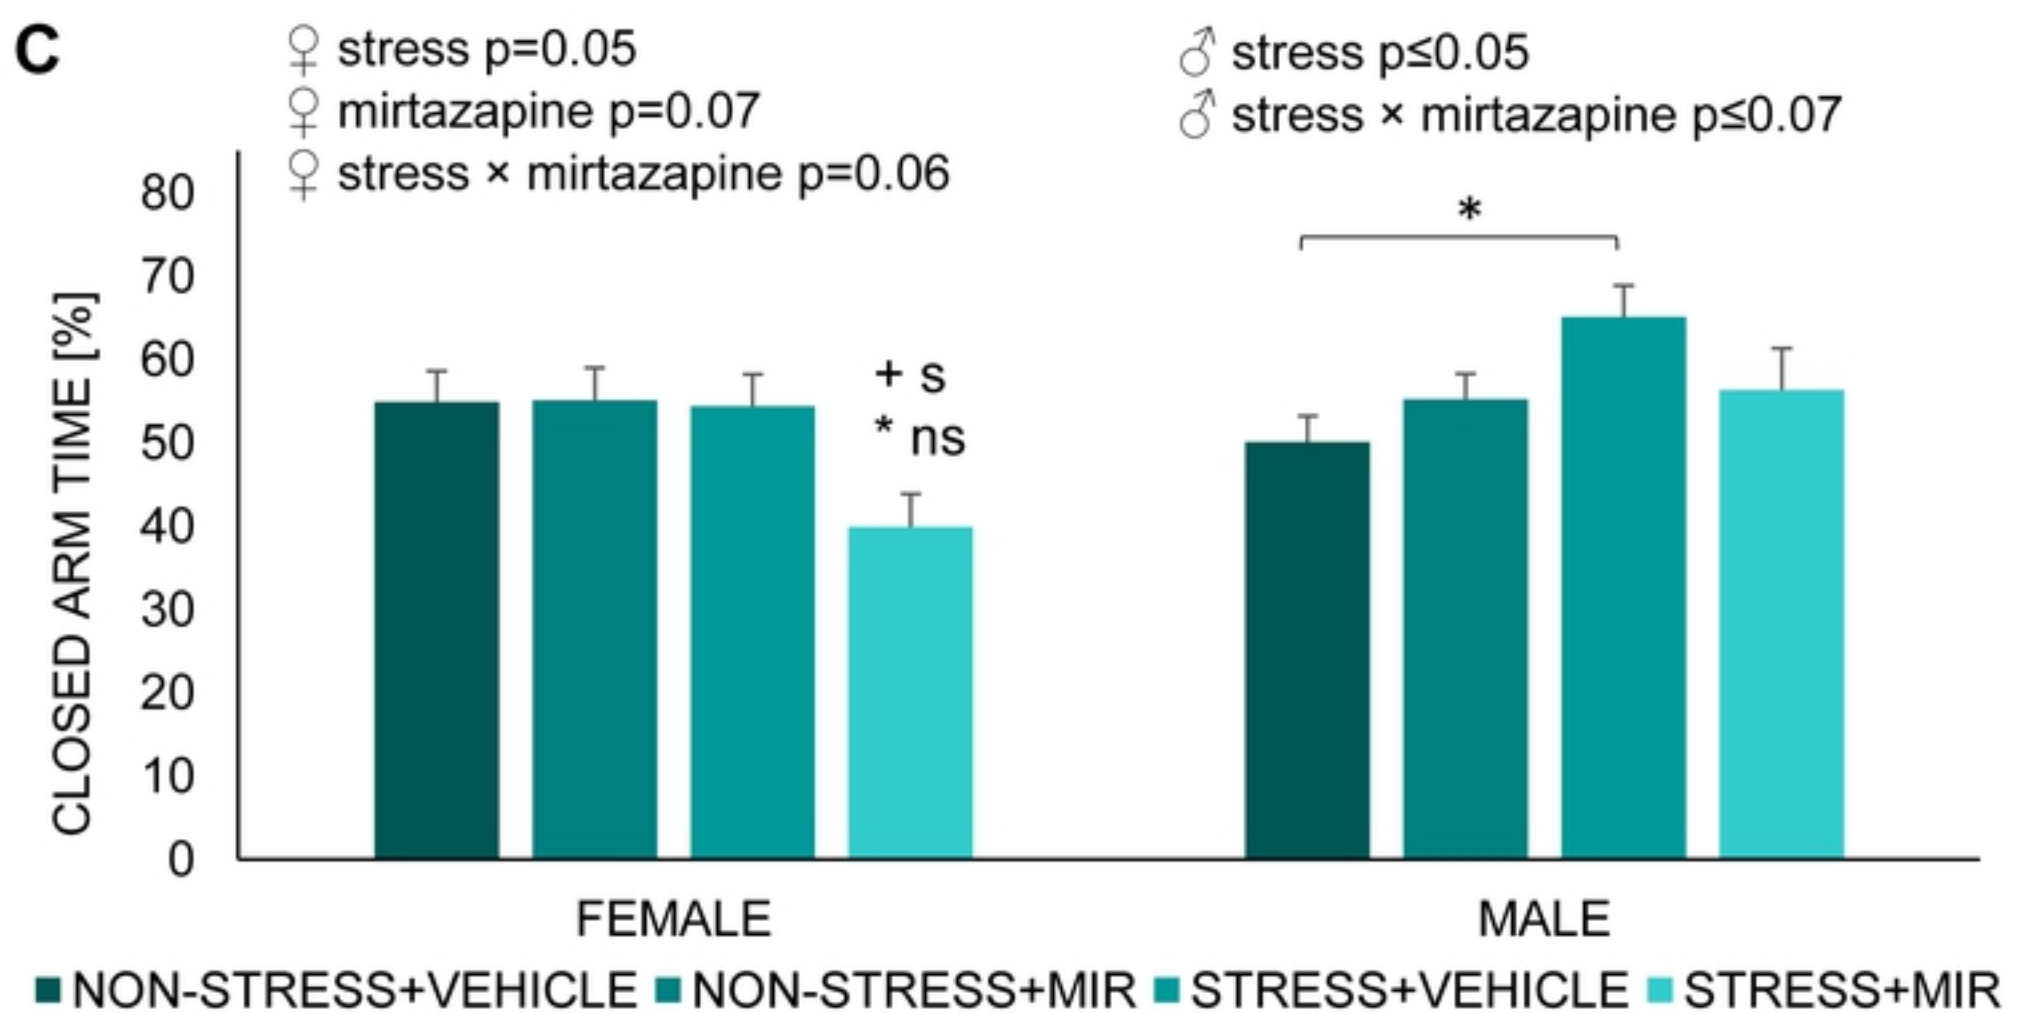

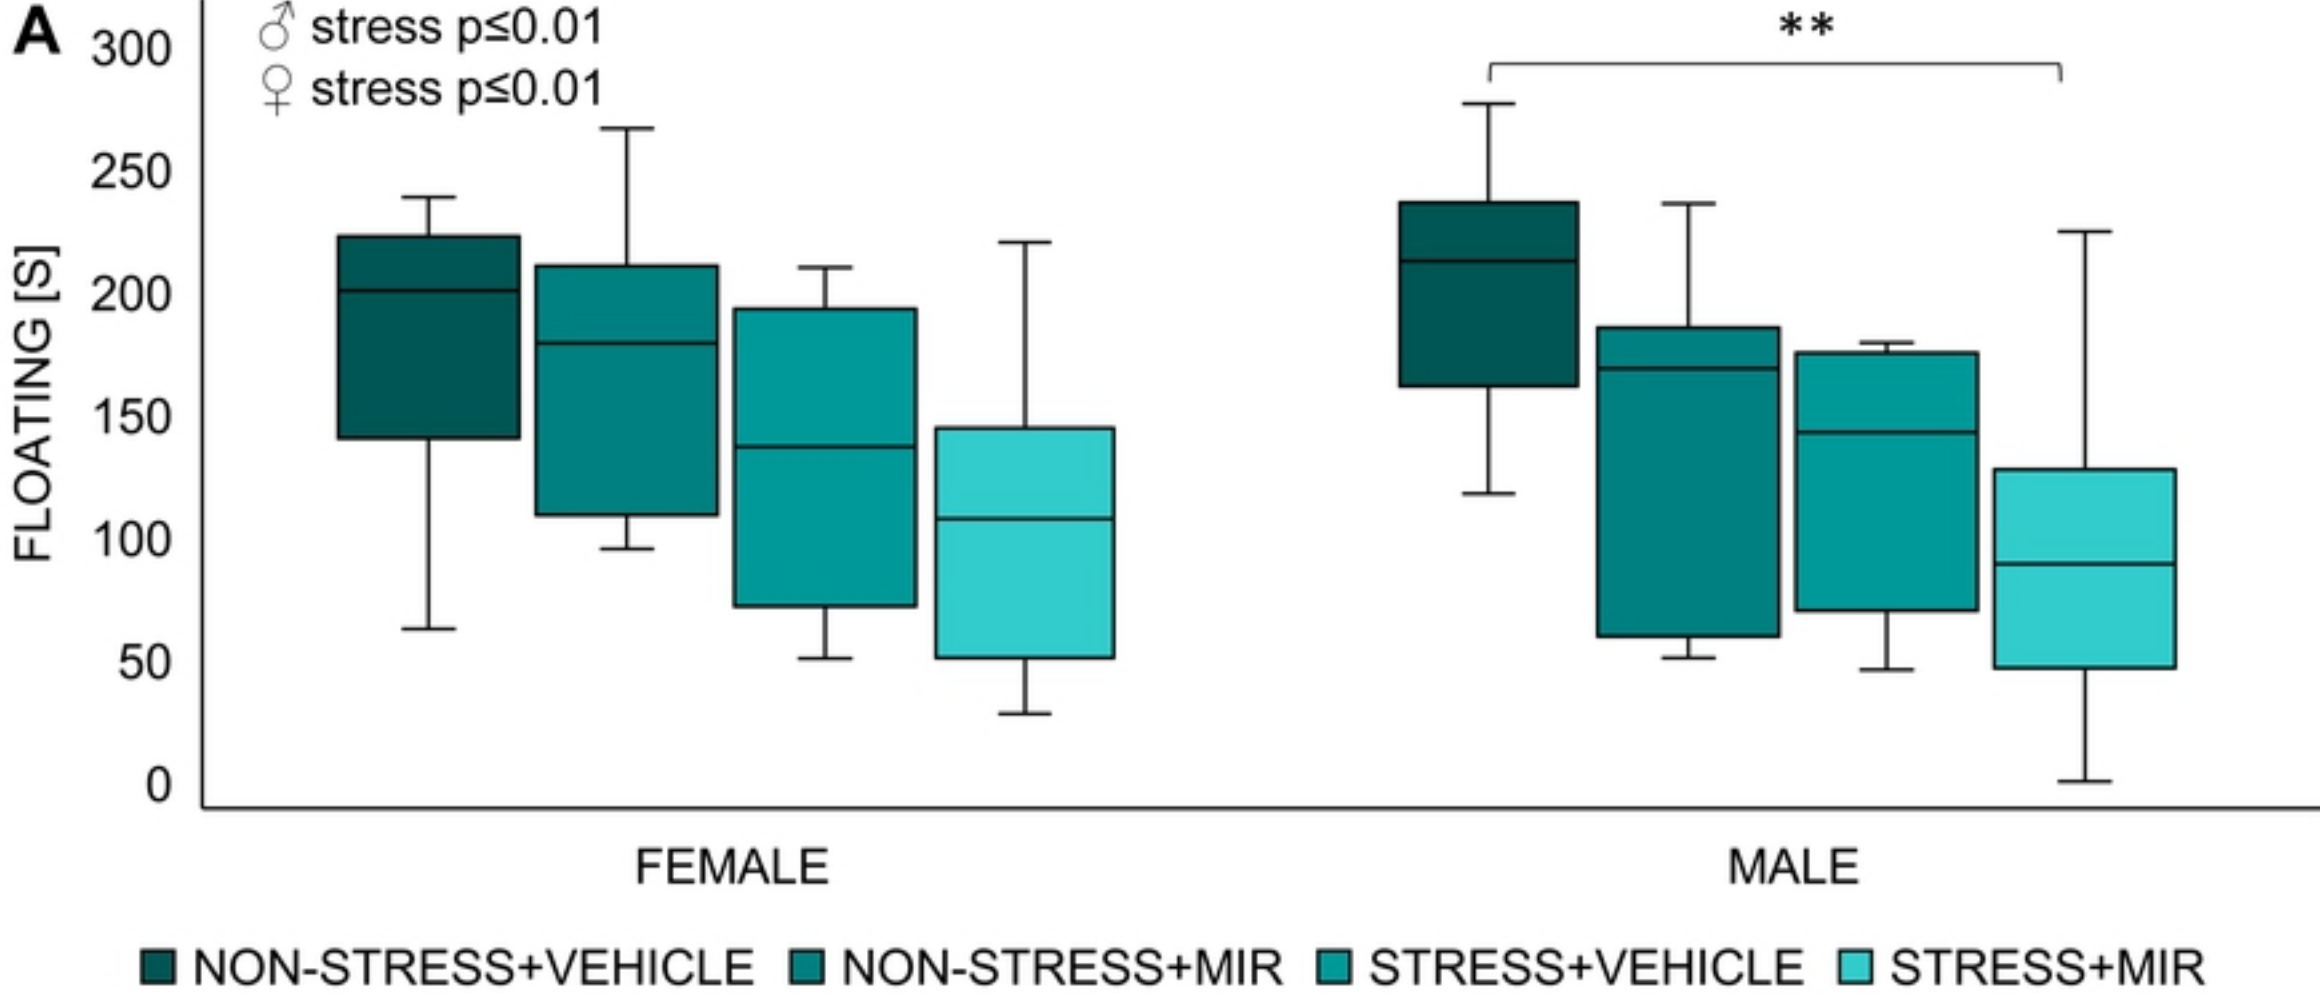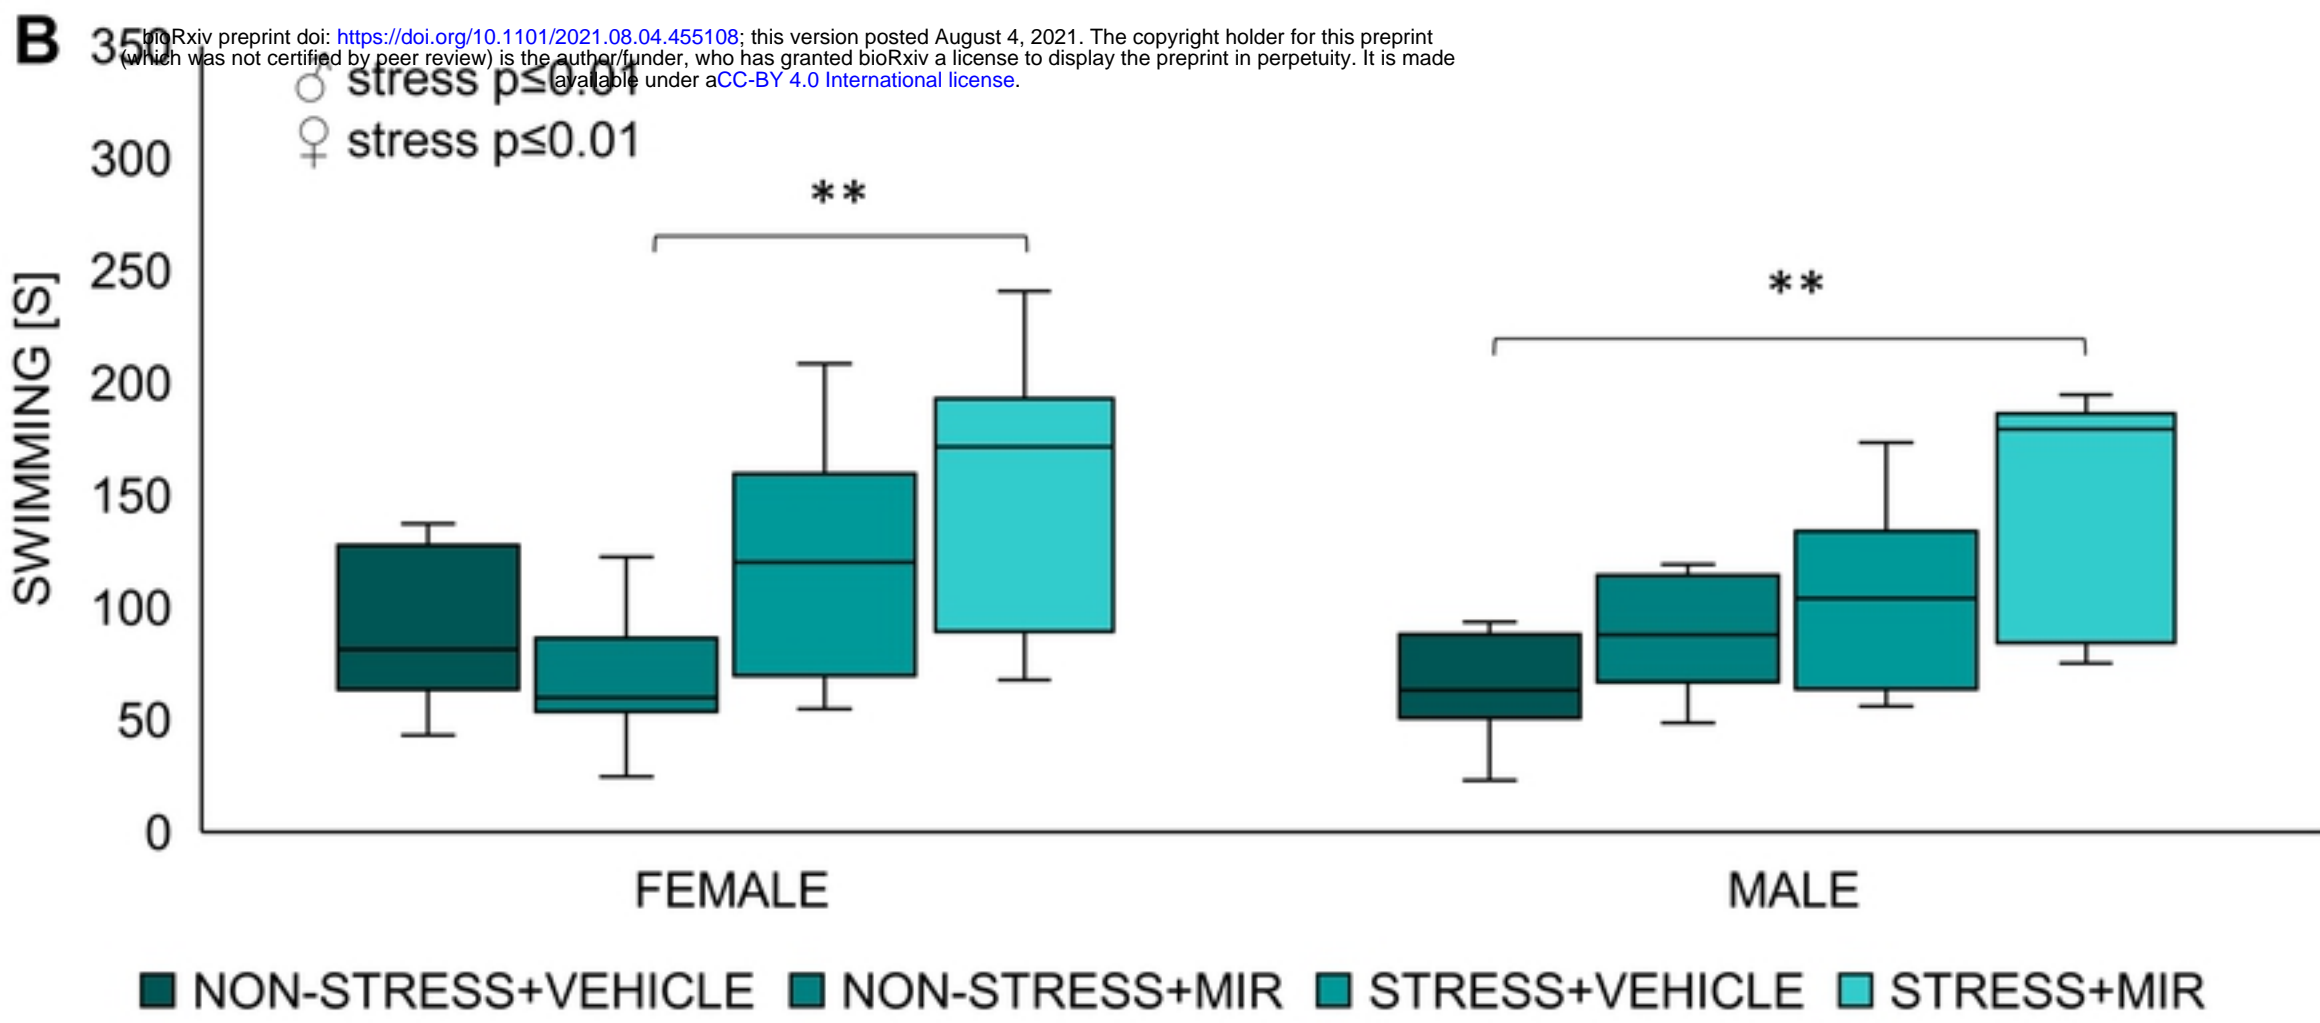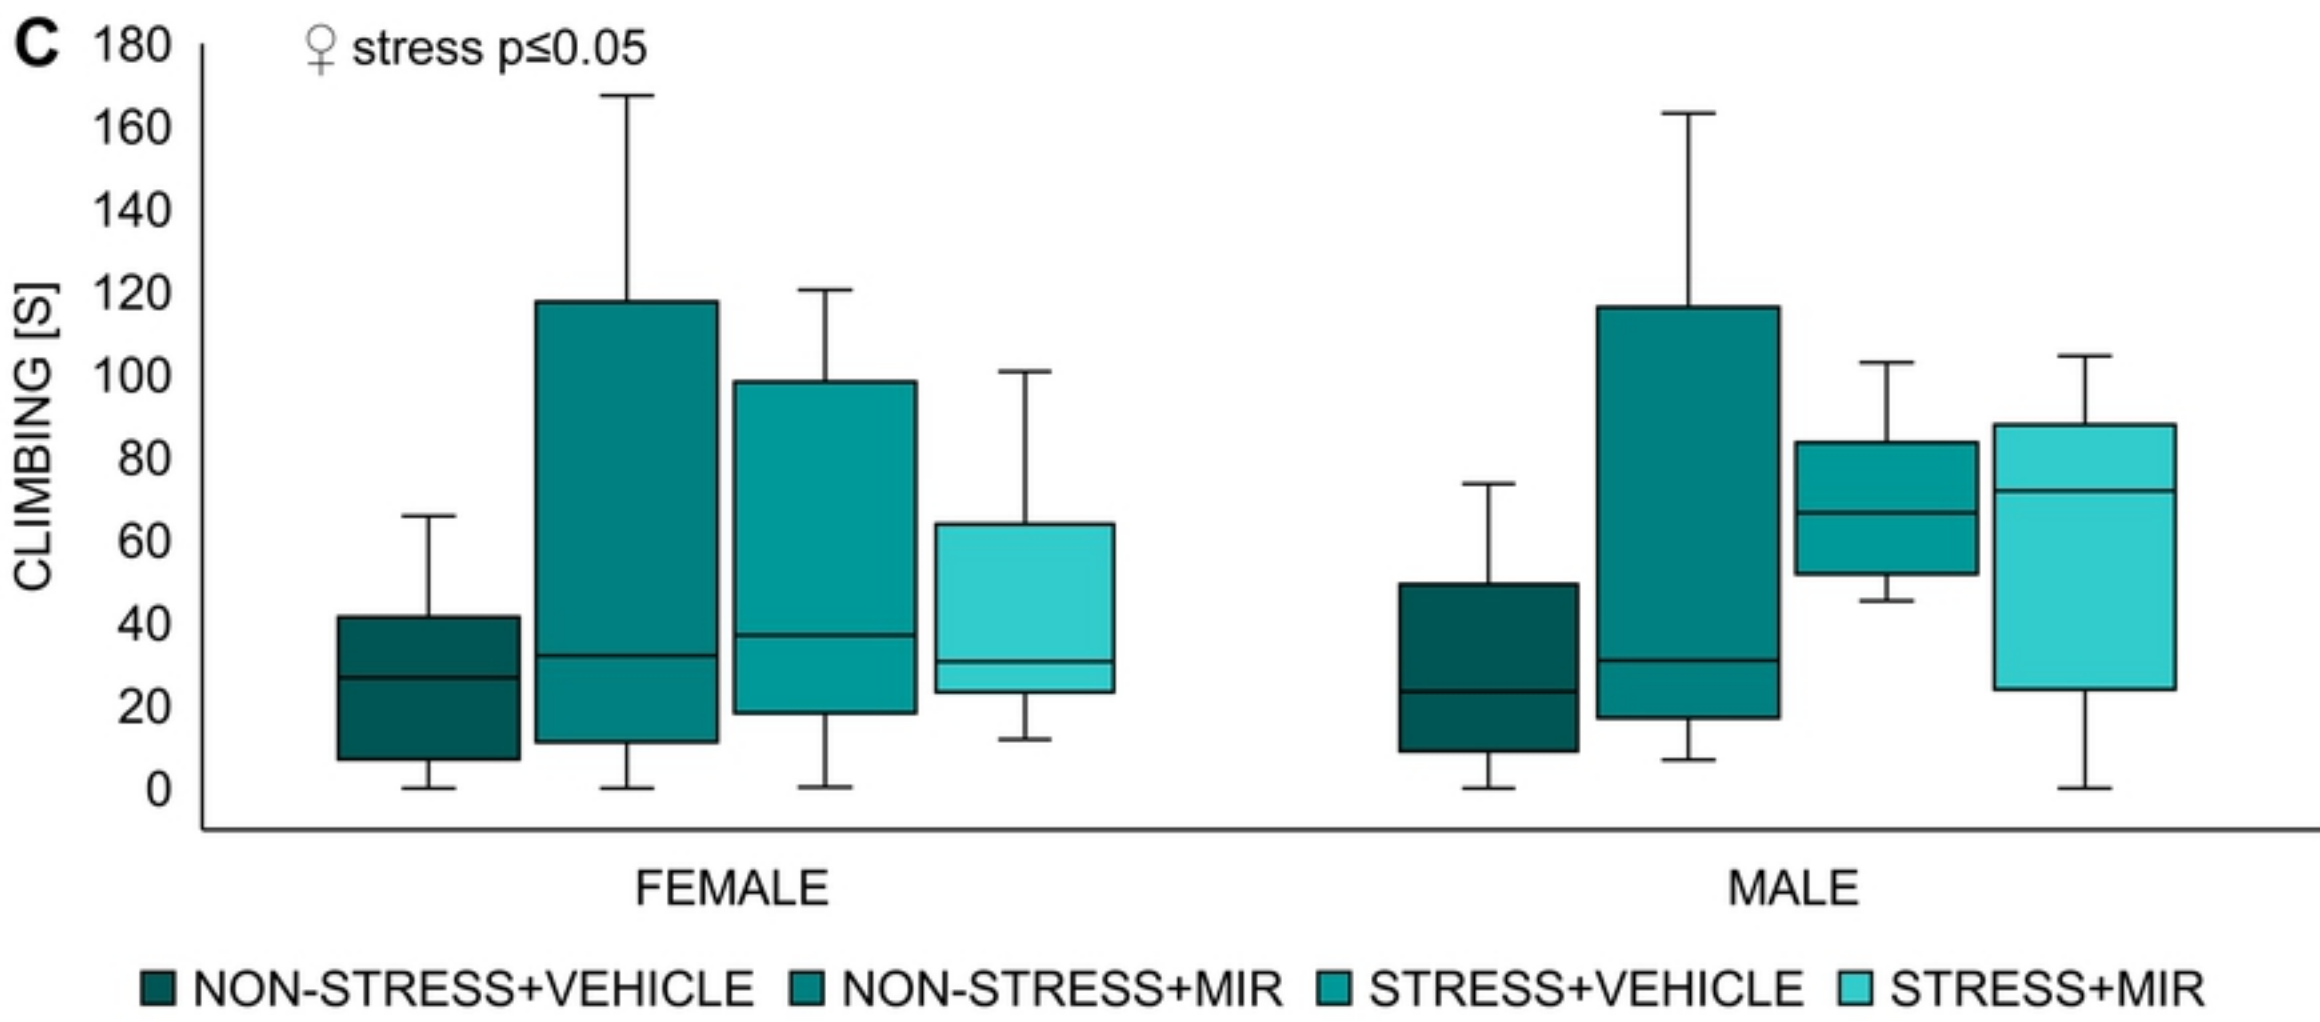

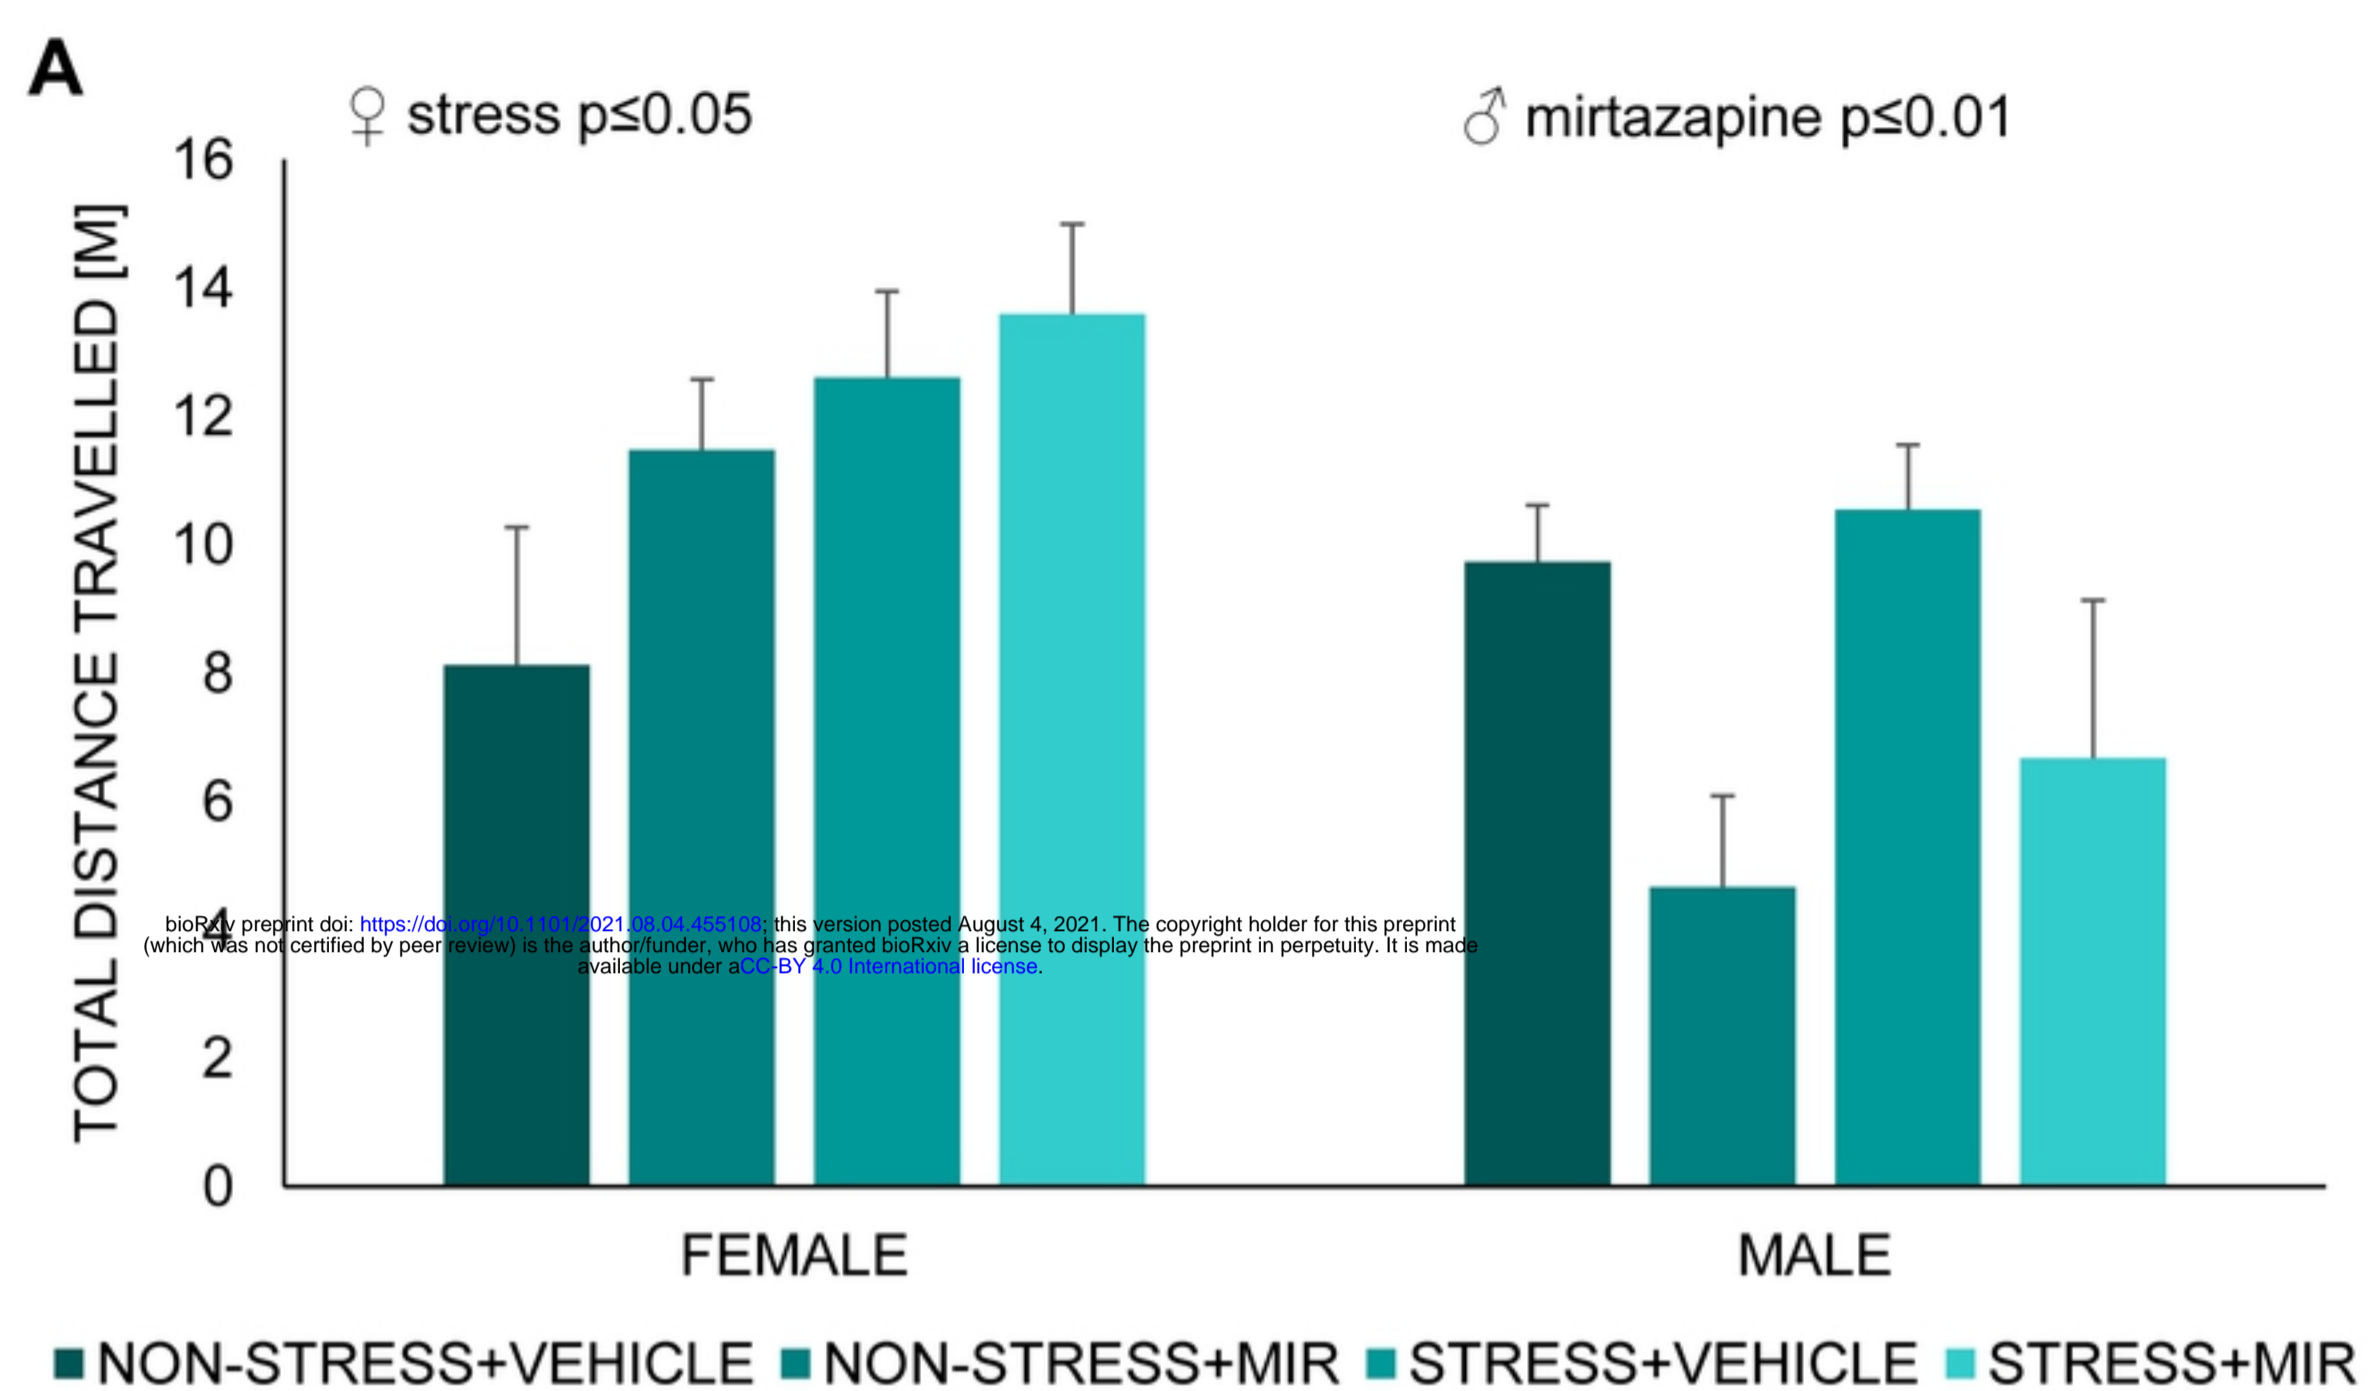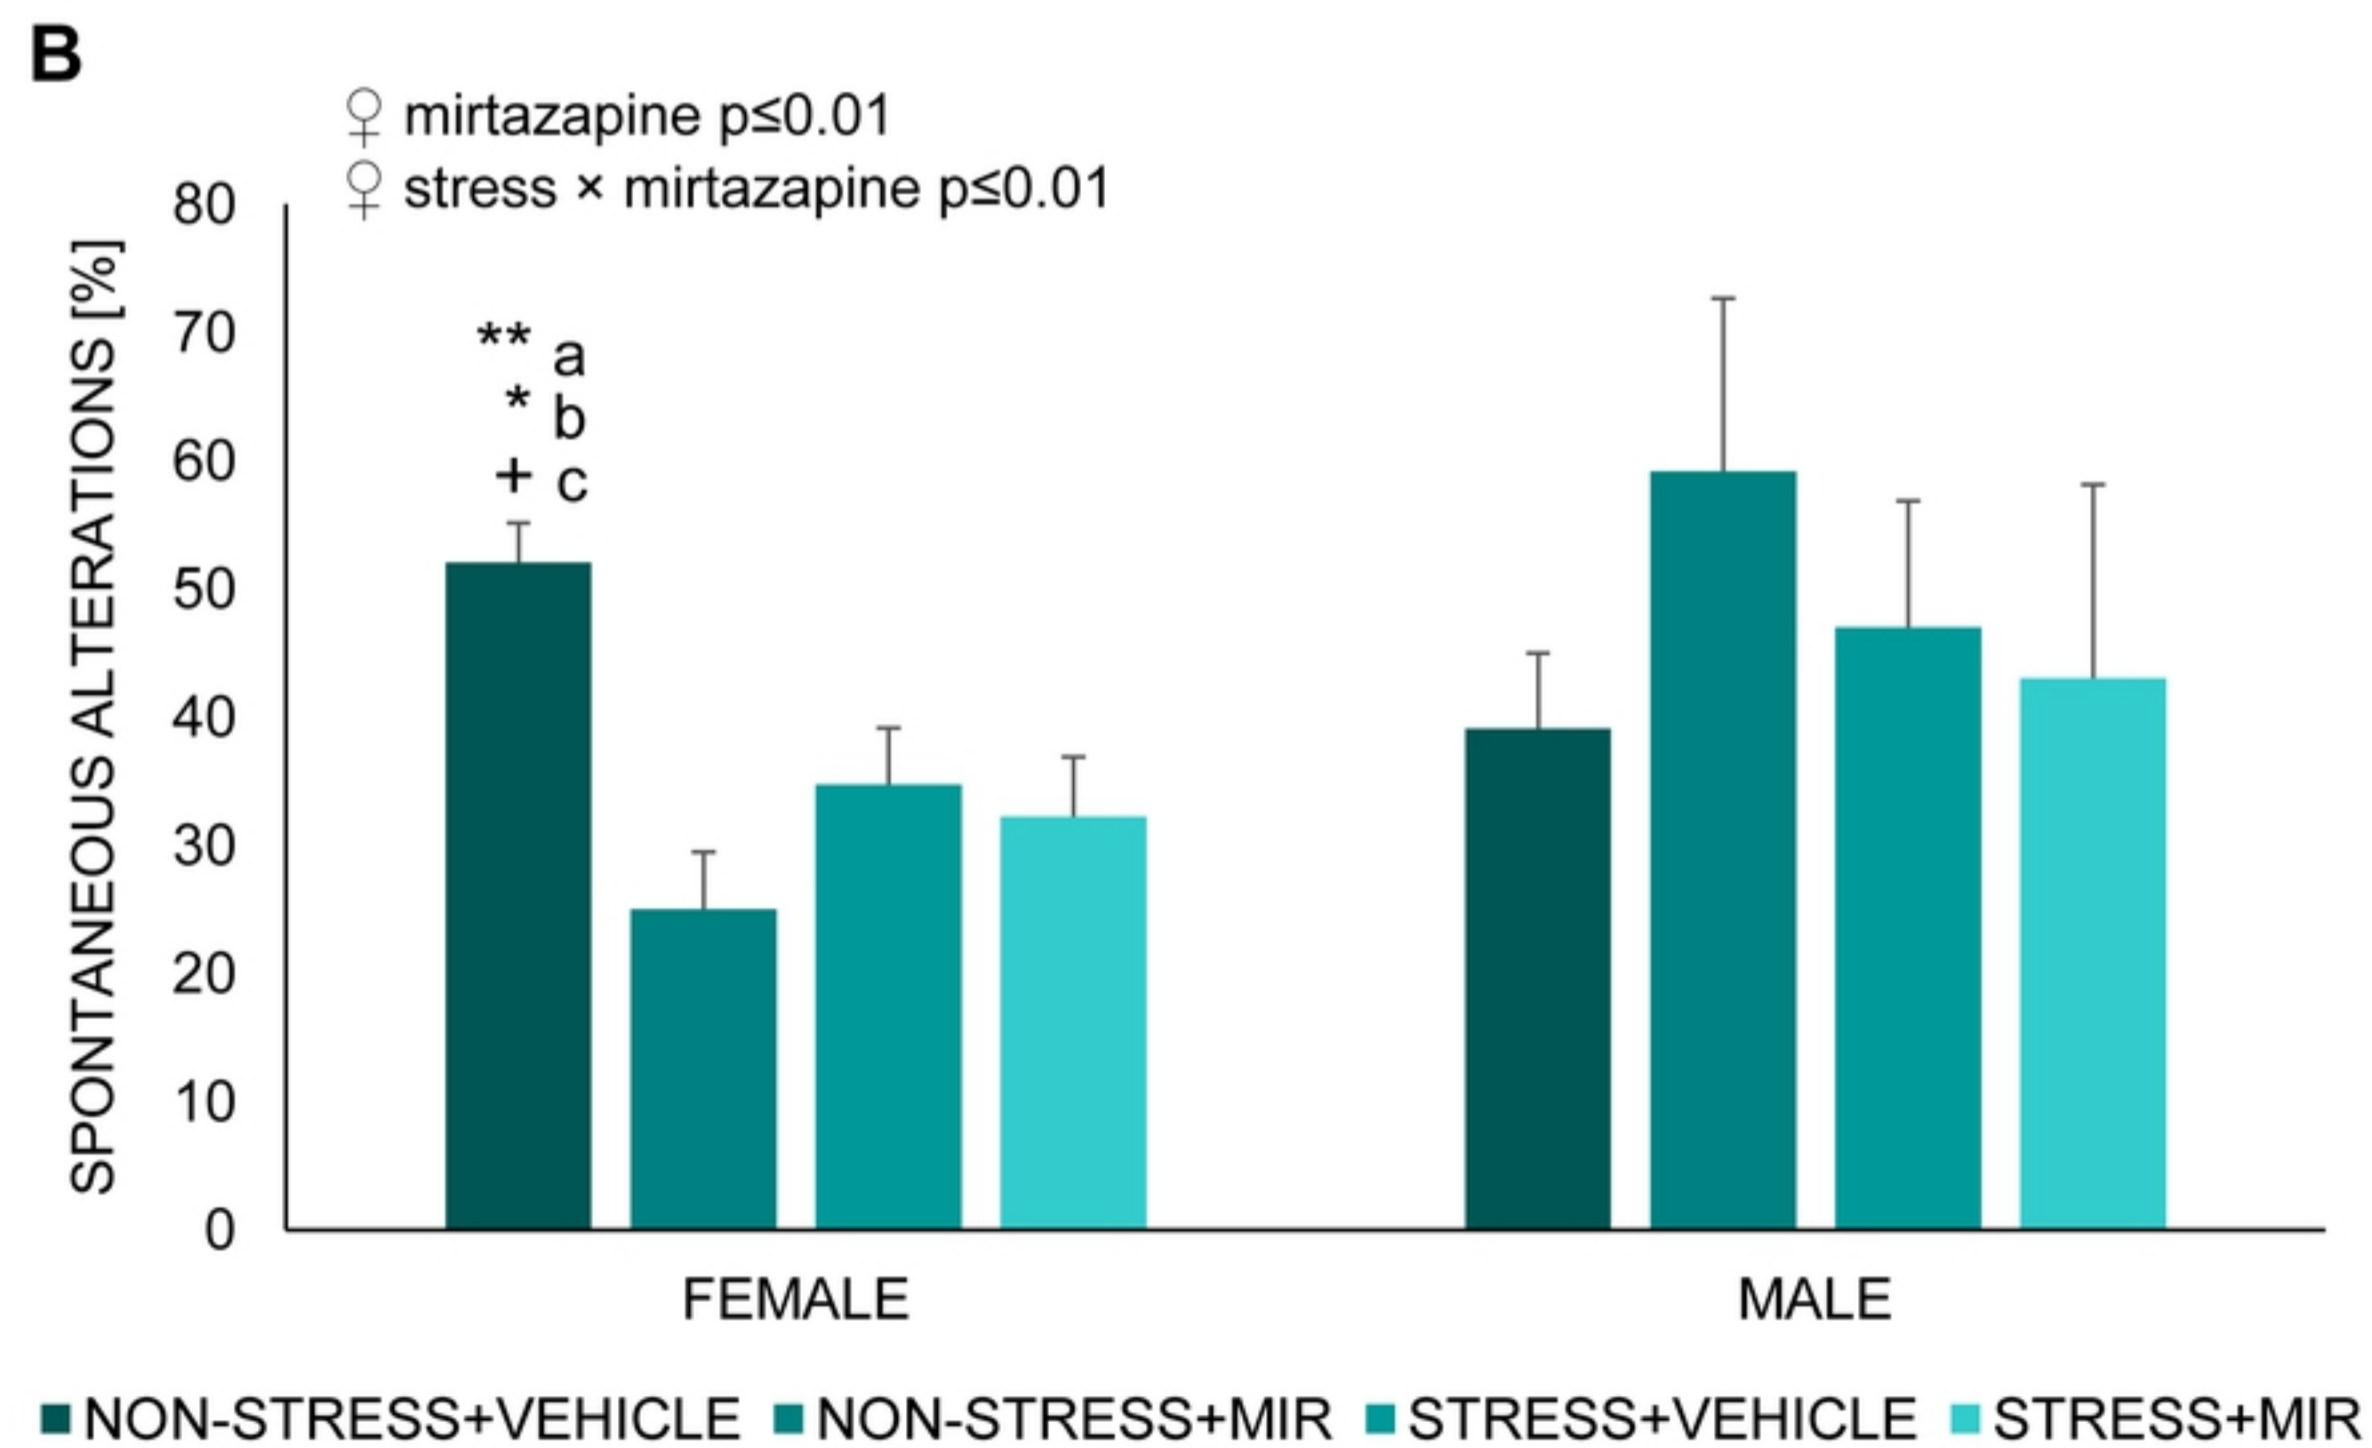

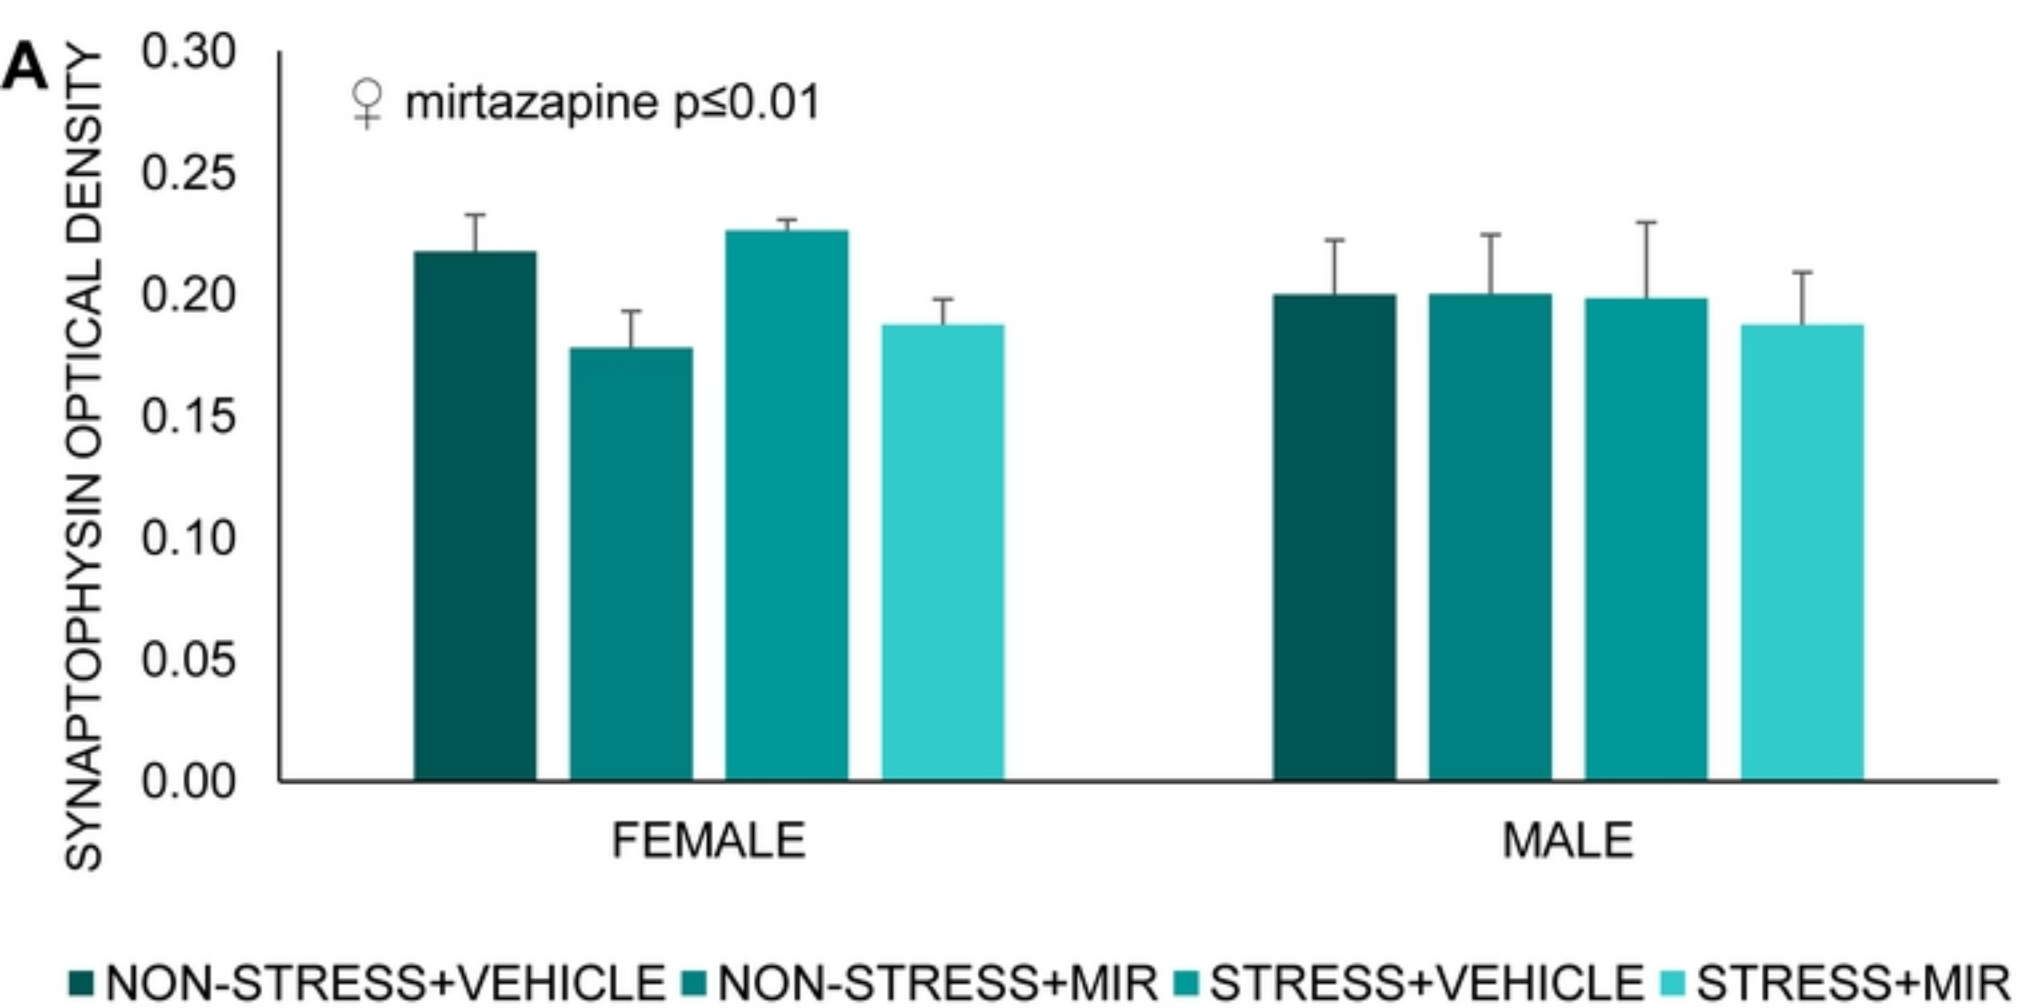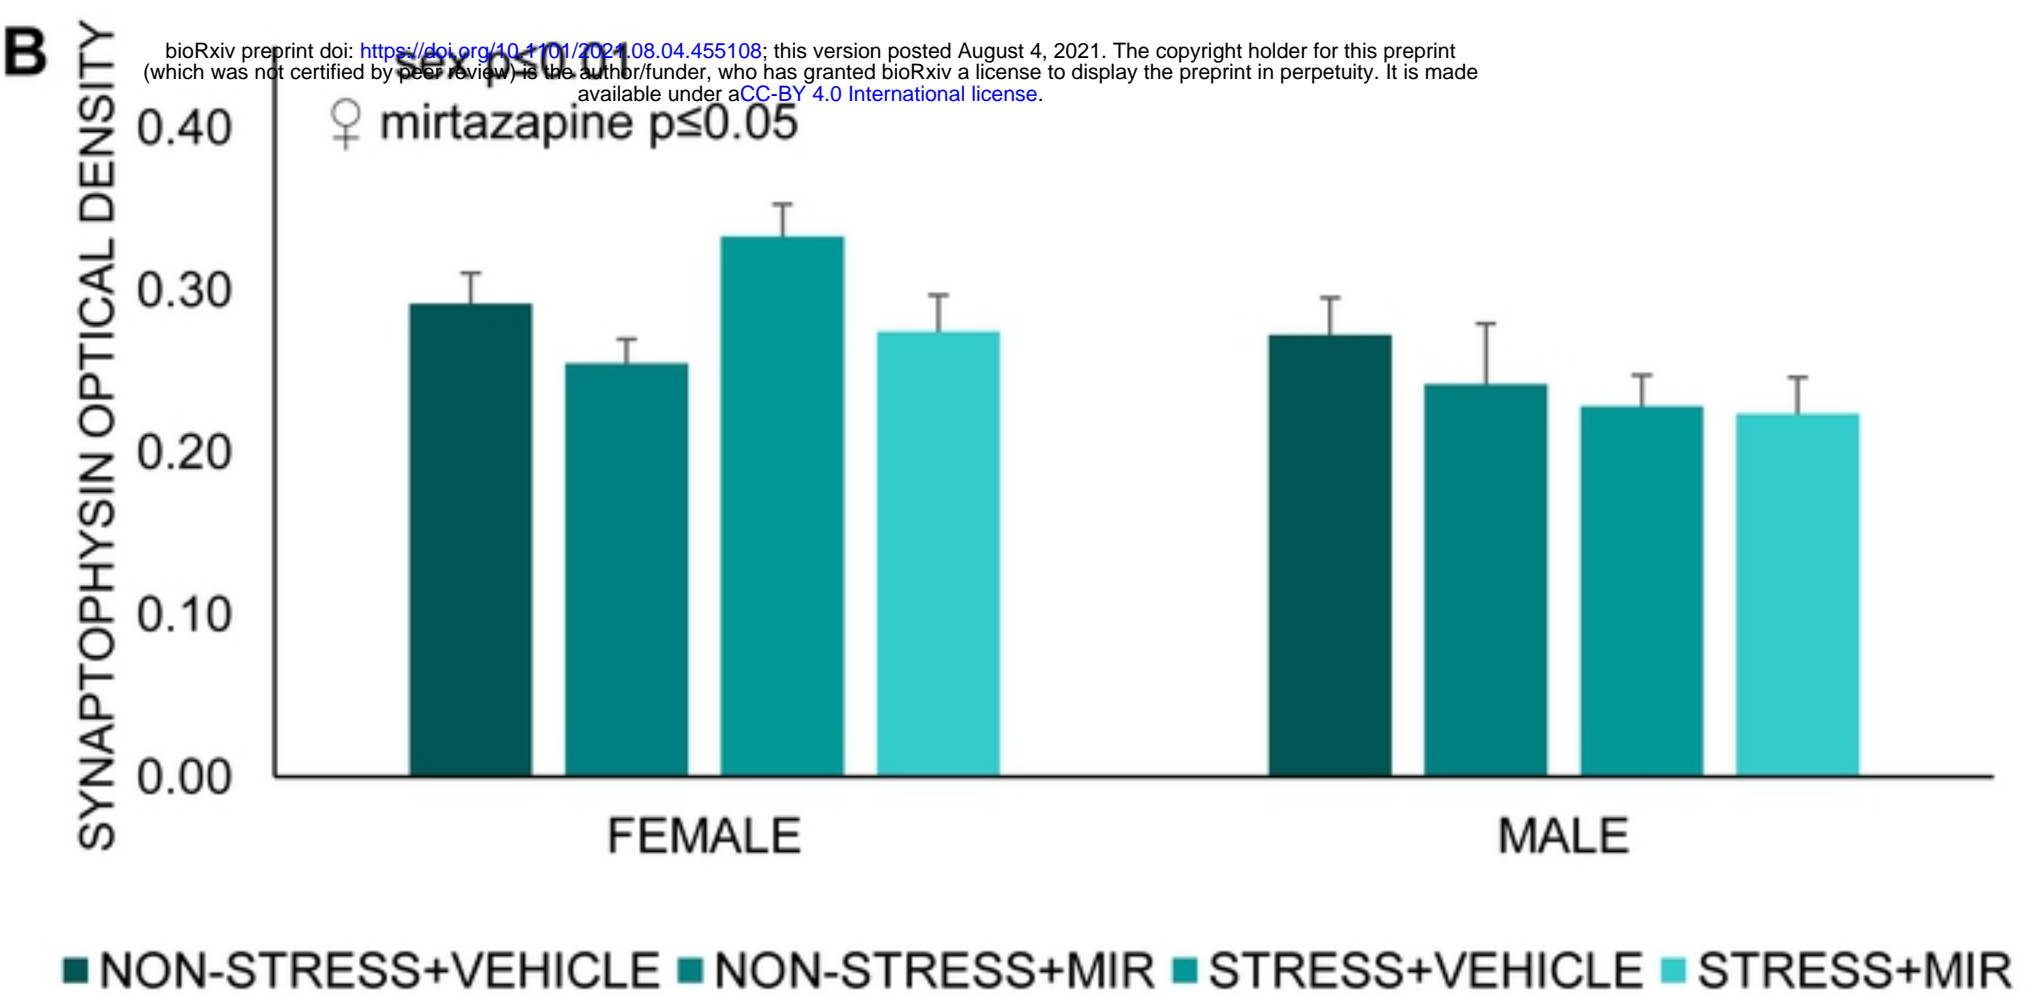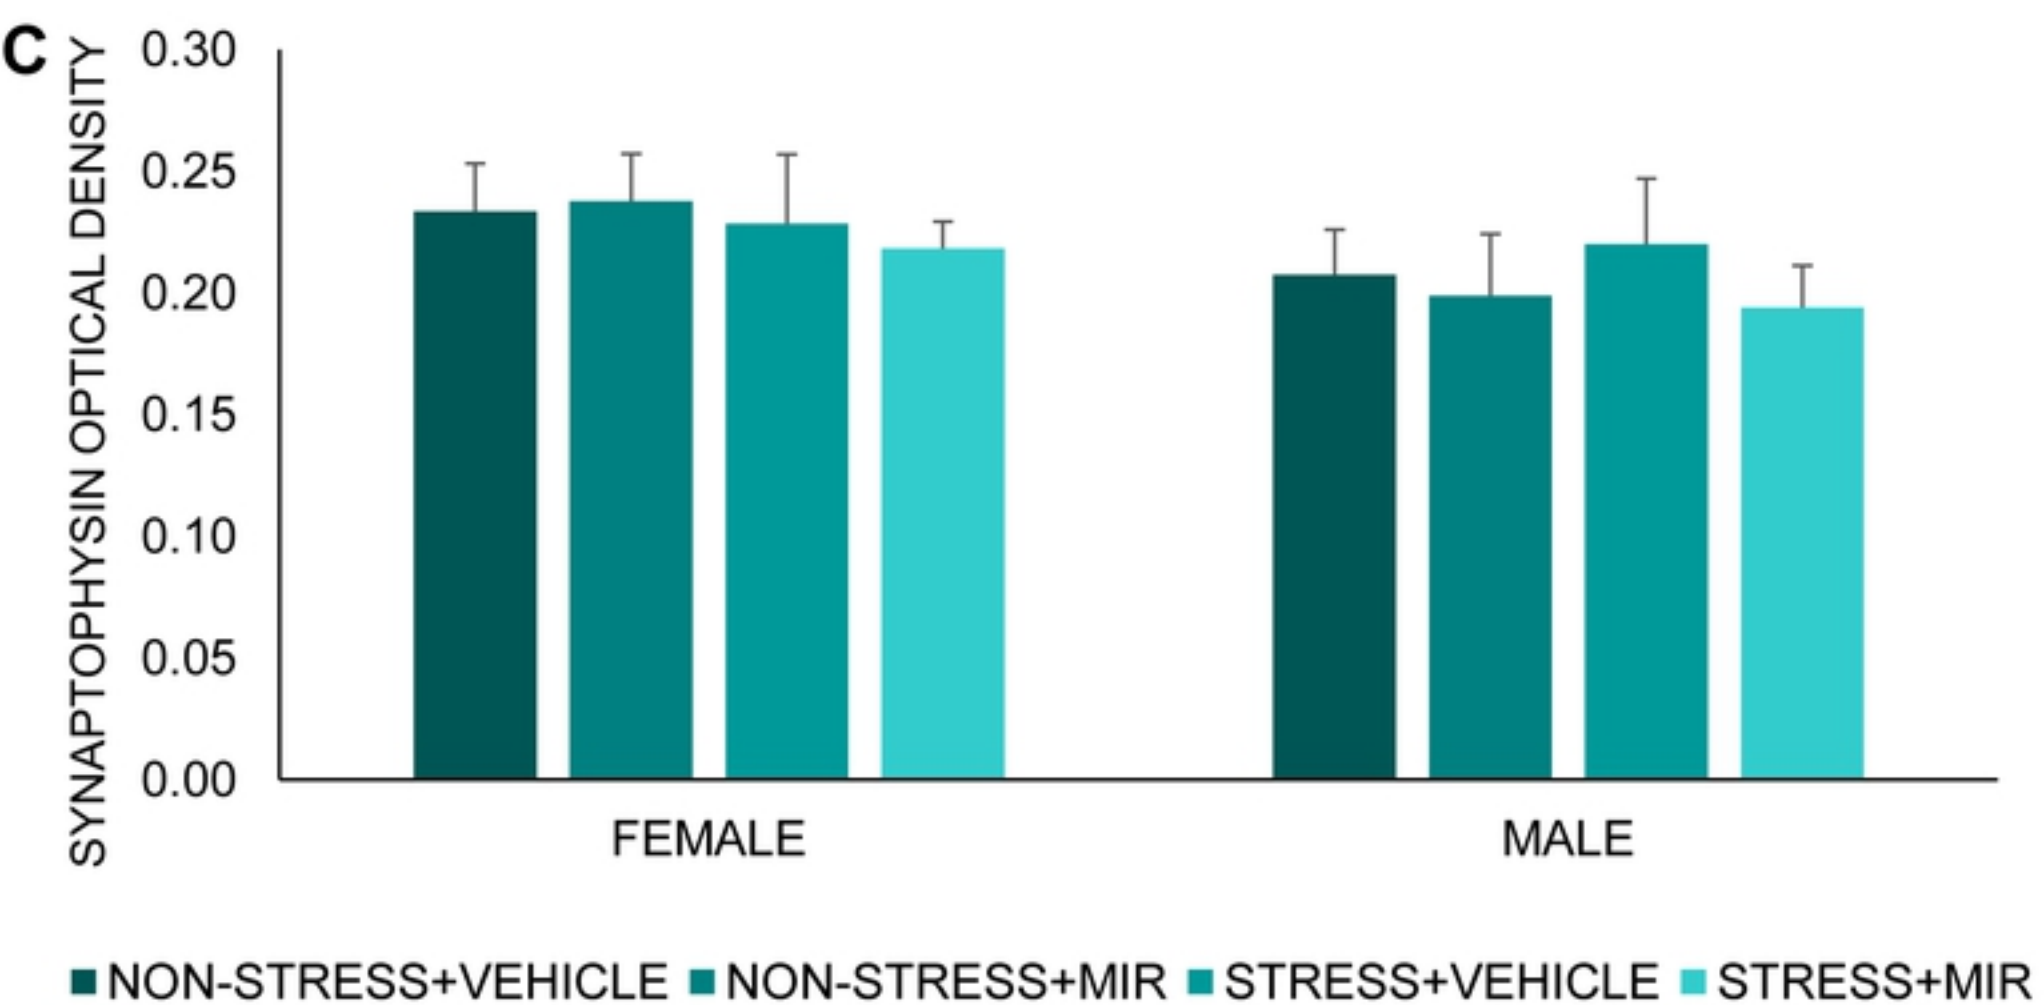

Source: http://biorxiv.org/content/10.1101/2021.08.04.455108v1.full.pdf
